# Supplementary material for: Hypersegmented airway neutrophils and its association with reduced lung function in adults with obstructive airway disease: an exploratory study
Source: PubMed Central journal article supplement — BMJ Open. 2019 Jan 28;9(1):e024330. doi: 10.1136/bmjopen-2018-024330 (PMC6352776; doi:10.1136/bmjopen-2018-024330), 2019-01-28
Supplement: bmjopen-2018-024330.draft_revisions.pdf [file bmjopen-2018-024330.draft_revisions.pdf]

# BMJ Open

BMJ Open is committed to open peer review. As part of this commitment we make the peer review history of every article we publish publicly available.

When an article is published we post the peer reviewers' comments and the authors' responses online. We also post the versions of the paper that were used during peer review. These are the versions that the peer review comments apply to.

The versions of the paper that follow are the versions that were submitted during the peer review process. They are not the versions of record or the final published versions. They should not be cited or distributed as the published version of this manuscript.

BMJ Open is an open access journal and the full, final, typeset and author-corrected version of record of the manuscript is available on our site with no access controls, subscription charges or pay-per-view fees (<http://bmjopen.bmj.com>).

If you have any questions on BMJ Open's open peer review process please email [editorial.bmjopen@bmj.com](mailto:editorial.bmjopen@bmj.com)

# BMJ Open

## Hypersegmented airway neutrophils and its association with reduced lung function in adults with obstructive airway disease.

|                               |                                                                                                                                                                                                                                                                                                                                                                                                                                                                                                                                                         |
|-------------------------------|---------------------------------------------------------------------------------------------------------------------------------------------------------------------------------------------------------------------------------------------------------------------------------------------------------------------------------------------------------------------------------------------------------------------------------------------------------------------------------------------------------------------------------------------------------|
| Journal:                      | <i>BMJ Open</i>                                                                                                                                                                                                                                                                                                                                                                                                                                                                                                                                         |
| Manuscript ID                 | bmjopen-2018-024330                                                                                                                                                                                                                                                                                                                                                                                                                                                                                                                                     |
| Article Type:                 | Research                                                                                                                                                                                                                                                                                                                                                                                                                                                                                                                                                |
| Date Submitted by the Author: | 23-May-2018                                                                                                                                                                                                                                                                                                                                                                                                                                                                                                                                             |
| Complete List of Authors:     | Lokwani, Ravi; University of Newcastle School of Medicine and Public Health, Priority Research Centre for Healthy Lungs, Faculty of Health and Medicine,<br>Wark, Peter; Centre for Asthma and Respiratory Disease University of Newcastle, Respiratory and Sleep Medicine<br>Baines, Katherine; University of Newcastle, Respiratory and Sleep Medicine<br>Barker, Daniel; University of Newcastle School of Medicine and Public Health, Faculty of Health and Medicine<br>Simpson, Jodie; The University of Newcastle, Respiratory and Sleep Medicine |
| Keywords:                     | Immunology < THORACIC MEDICINE, Bronchoscopy < THORACIC MEDICINE, Chronic airways disease < THORACIC MEDICINE                                                                                                                                                                                                                                                                                                                                                                                                                                           |
|                               |                                                                                                                                                                                                                                                                                                                                                                                                                                                                                                                                                         |

SCHOLARONE™  
Manuscripts

1  
2  
3 **Hypersegmented airway neutrophils and its association with reduced lung function in**  
4 **adults with obstructive airway disease.**  
5

6  
7 **Authors:** Ravi Lokwani <sup>1, 3</sup>, Peter AB Wark <sup>1-3</sup>, Katherine J Baines <sup>1, 3</sup>, Daniel Barker <sup>3</sup>, Jodie  
8  
9 L Simpson <sup>1-3</sup>  
10

11  
12 **Affiliations:**  
13

14  
15 **1:** Priority Research Centre for Healthy Lungs, Faculty of Health and Medicine, Hunter  
16  
17 Medical Research Institute, University of Newcastle, Callaghan NSW 2308, Australia.  
18

19  
20 **2:** Department of Respiratory and Sleep Medicine, John Hunter Hospital, New Lambton  
21  
22 Heights, NSW, 2305, Australia.  
23

24  
25 **3:** School of Medicine and Public Health, Faculty of Health and Medicine, University of  
26  
27 Newcastle, Callaghan NSW 2308, Australia.  
28

29  
30 **Corresponding Author:**  
31

32  
33 Professor Jodie L Simpson  
34

35  
36 Level 2, East Wing, Hunter Medical Research Institute,  
37

38  
39 Locked Bag 1000, New Lambton, NSW 2305, Australia.  
40

41  
42 Email: jodie.simpson@newcastle.edu.au  
43

44  
45 Phone: 61 2 40420148 Fax: 61 2 49855850  
46

47 **Key words:** Immunology, Chronic airways disease, Bronchoscopy.  
48  
49

50  
51  
52 **Word**

**count:**

3021

53  
54  
55  
56  
57  
58 1  
59

**ABSTRACT:**

**Objectives:** The significance of neutrophilic inflammation in obstructive airway disease remains controversial. Recent studies have demonstrated presence of an active neutrophil population in systemic circulation, featuring hypersegmented morphology, with high oxidative burst and functional plasticity in inflammatory conditions. The aim of this study was to characterize neutrophil subsets in obstructive airway disease participants (asthma, COPD and bronchiectasis) and healthy controls on the basis of nuclear morphology and to assess association between neutrophil subsets and clinical parameters of obstructive airway disease participants.

**Design:** A cross-sectional study.

**Setting:** John Hunter Hospital and Hunter Medical Research Institute, Australia.

**Participants:** 80 adults with obstructive airway disease, stable asthma (n=40) COPD (n=20), and bronchiectasis (n=20) and 20 healthy controls.

**Material and Methods:** Cytospins were prepared and neutrophil subtypes were classified based on the cells nuclear morphology into hypersegmented (>4 lobes), normal (2-4 lobes) and banded (1 lobe) neutrophils and enumerated.

**Results:** Neutrophils from each subset were identified in all participants. Numbers of hypersegmented neutrophils were elevated in participants with airway disease compared with healthy controls ( $p < 0.001$ ). Both the number and proportion of hypersegmented neutrophils were highest in COPD participants (median (q1-q3) of 939.8 (201.1-2136)  $\times 10^2/\text{mL}$  and 23.5 (11.0-46.5) %), respectively. An increased proportion of hypersegmented neutrophils in airway disease participants was significantly associated with lower FEV<sub>1</sub>/FVC % ( $\rho = -0.313$ ,  $p = 0.005$ ).

**Conclusion:** Neutrophil heterogeneity is common in BL and is associated with more severe airflow obstruction in adults with airways disease. Further work is required to elucidate the functional consequences of hypersegmented neutrophils in the pathogenesis of disease.

**Word count:** 254

### STRENGTHS AND LIMITATION OF STUDY

- This study characterizes three neutrophil subsets in bronchial lavage from adults with obstructive airway disease and healthy controls on the basis of nuclear morphology.
- There was an increase presence of hypersegmented neutrophils in obstructive airway disease in comparison with healthy controls.
- We show a clinical association of hypersegmented neutrophils with airway obstruction.
- The cross-sectional nature of study is a limitation in properly understanding the reason behind neutrophil heterogeneity in airways.

## INTRODUCTION:

Neutrophils are phagocytic innate immune cells which patrol blood vessels and become activated in response to inflammatory triggers<sup>1</sup>. Activation results in neutrophil migration to the site of infection, where pathogens can be eliminated by phagocytosis or NETosis<sup>2</sup>. Similarly, infection or injury can result in the initiation of an innate immune response following the engagement of PAMPs (pathogen associated molecular patterns) and DAMPs (damage associated molecular patterns) with pattern recognition receptors of airways. This facilitates the release of chemotactic stimuli such as CXCL8, IL-1 $\beta$ , and TNF- $\alpha$ , resulting in neutrophil recruitment to the airways<sup>3</sup>, which is important for the resolution of infection and inflammation<sup>4</sup>. In contrast, a disproportionate or dysregulated influx or efflux of neutrophils can result in persistent neutrophilic airway inflammation and tissue damage<sup>5</sup>.

Inflammation characterised by airway neutrophilia is reported in many cases of chronic obstructive airway disease<sup>6</sup>. This includes 20-30% cases of asthma<sup>7</sup>, more than 40% of cases of chronic obstructive pulmonary disease (COPD)<sup>8,9</sup>, and 70% of cases of non-cystic fibrosis (CF) bronchiectasis<sup>10</sup>. Current therapeutic and management strategies for asthma and COPD focus on bronchodilation to overcome airflow limitation, or inhaled corticosteroids based therapies along with modification of eosinophilic airway inflammation using corticosteroids<sup>11</sup><sup>12</sup>. In non-CF bronchiectasis treatment relies on antibiotics to control the infective nature of the disease<sup>13</sup>. While inhaled corticosteroids are highly effective in modifying eosinophilic inflammation in the airways<sup>14</sup>, there are no treatments that have been shown to influence neutrophil mediated inflammation. One of the primary reasons behind this is our lack of understanding about neutrophils<sup>15,16</sup>.

Despite the fact that previous studies have shown an association between elevated neutrophils in airways with lower FEV<sub>1</sub> in obstructive airway disease<sup>17</sup>, little is known about variations

1  
2  
3 within the population of neutrophils in the airways. Recent studies have identified  
4 heterogeneity within circulating neutrophils. Pillay, *et al*<sup>18</sup> identified three subsets of  
5 neutrophils (normal, banded and hypersegmented) in the circulation following an inflammatory  
6 challenge. Each subtype had a distinct nuclear morphology and pattern of surface adhesion  
7 molecule expression, with hypersegmented neutrophils showing increased capacity for  
8 oxidative burst along with a unique ability to suppress T lymphocytes. The same  
9 morphologically distinct subsets have been identified in both bronchial lavage (BL) and blood  
10 from patients with acute respiratory distress syndrome<sup>19</sup> and in infants with severe viral  
11 respiratory infection<sup>20</sup>.

12  
13  
14  
15  
16  
17  
18  
19  
20  
21  
22  
23 The presence and characteristics of neutrophil subsets in obstructive airways disease is  
24 unknown. In this study, we have characterised neutrophil subsets in BL fluid from adults with  
25 asthma, COPD, non-CF bronchiectasis and healthy controls. We hypothesised that participants  
26 with obstructive airway disease would have increased numbers of hypersegmented neutrophils  
27 and that the presence of hypersegmented neutrophils would be associated with clinical disease  
28 severity.

## 29 30 31 32 33 34 35 36 37 38 39 **MATERIAL AND METHODS:**

40  
41  
42 **Patient and Public Involvement (PPI):** Patients and or the public were not involved in the  
43 development of the research question and outcome measures of this study. The research  
44 question was developed by authors (JLS and PABW). Patients were recruited if they were  
45 undergoing a bronchoscopy as explained in "participants" section. The results will be  
46 disseminated through publication and presentation at local, national and international research  
47 meetings.

1  
2  
3 **Participants:** Adults who were undergoing bronchoscopy for airways assessment were  
4 recruited from the John Hunter Hospital. The study was approved by Hunter New England  
5 Human Research Ethics Committee (Reference No 05/08/10/3.09) and all participants provided  
6 written informed consent.  
7  
8  
9

10  
11  
12 **Study design:** A cross sectional study was conducted in which BL samples were obtained after  
13 the assessment of clinical history including respiratory symptoms, smoking status and  
14 medication. Spirometry and bronchoscopy were performed as outlined below.  
15  
16  
17

18  
19 **Study group:** Adults (>18 years) with no history of a clinical chest or upper respiratory tract  
20 infection in the previous 6 weeks were studied. Healthy non-smokers (n=20) had normal lung  
21 function assessed by spirometry, and had no previous history of respiratory disease. Adults  
22 with asthma (n=40) had a physician's diagnosis of asthma with objective evidence of airflow  
23 variability or bronchial hyperactivity on provocation challenge. Bronchiectasis (n=20) was  
24 defined as evidence of a permanent dilation of airway segment on high resolution computed  
25 tomography scan while those with COPD (n=20) had evidence of respiratory symptoms in  
26 combination with a post bronchodilator FEV<sub>1</sub> of less than 80% of predicted value and/or a post  
27 bronchodilator FEV<sub>1</sub>/FVC less than 70%. Current smokers were excluded.  
28  
29  
30  
31  
32  
33  
34  
35  
36  
37  
38

39 **Spirometry:** Spirometry was performed (Easy One Spirometer, ndd Medical Technologies,  
40 Massachusetts, USA) at John Hunter Hospital. Variable obstruction defined as a post  
41 bronchodilator change in FEV<sub>1</sub> of 12% or 200mL after 400 mcg of salbutamol and the  
42 bronchial hyper-responsiveness defined as at least 15% decline in FEV<sub>1</sub> after inducing  
43 bronchial provocation with 4.5% saline solution.  
44  
45  
46  
47  
48  
49

50 **Bronchoscopy:** Flexible bronchoscopy was performed at John Hunter Hospital and bronchial  
51 wash was taken by wedging the bronchoscope into the right middle lobe and washing with 40  
52  
53  
54  
55  
56  
57



1  
2  
3 mL of sterile saline solution. A fraction of BL was sent for microbial detection while the rest  
4  
5 was processed as described below.  
6

7  
8 **BL processing:** BL was filtered and total cell count (TCC) and viability assessed within one  
9  
10 hour of collection at Hunter Medical Research Institute. The BL was centrifuged and the cell  
11  
12 pellet was resuspended in PBS to the concentration of  $1 \times 10^6$ /mL and cellular cytopspins were  
13  
14 prepared. The cytopspins were stained with May-Grünwald Giemsa (Beckman Coulter, Brea,  
15  
16 CA, USA) and a differential cell count of 400 non squamous cells was performed.  
17

18  
19 **Neutrophil subtype assessment:** Stained cytopspins were examined under oil immersion and  
20  
21 100 neutrophils were enumerated into banded, normal and hypersegmented neutrophils.  
22  
23 Banded neutrophils had a single banded lobe without any visible division; normal neutrophils  
24  
25 had two to four lobes with every lobe having a properly visible outer boundary; and  
26  
27 hypersegmented neutrophils had more than four lobes with every lobe having a properly visible  
28  
29 outer boundary as shown in Figure 1.  
30  
31

32  
33 **Statistical Analysis:** Data were analysed using Stata software version 11 (StataCorp, College  
34  
35 Station, TX, USA). Results are reported as mean (SD) or median (interquartile range), unless  
36  
37 otherwise stated. Continuous measures were analysed using the two-sample Wilcoxon's rank  
38  
39 sum test or t-test and Kruskal-Wallis test or one way analysis of variance (ANOVA) as  
40  
41 appropriate. Categorical data were analysed using Fisher's exact test. Spearman correlation  
42  
43 coefficients were calculated for the association between neutrophil subsets and clinical  
44  
45 characteristics.  
46  
47  
48  
49  
50

## 51 **RESULTS**

### 52 **Clinical characteristics**

1  
2  
3 Participants with COPD were older, more likely to be ex-smoking males with more severe  
4 airflow obstruction (Table 1). Fewer participants with COPD were prescribed ICS compared  
5 with the asthma group, however, the mean daily dose of ICS was significantly higher in COPD  
6 participants.  
7  
8  
9  
10

### 11 **Inflammatory cell counts**

12  
13  
14  
15 BL inflammatory cell counts for the participants are detailed in Table 2. Participants with  
16 bronchiectasis and COPD had an increased total cell count (TCC) (Table 2). The proportion and  
17 number of neutrophils was significantly higher in the bronchiectasis and COPD group  
18 compared with healthy controls, while the proportion of neutrophils in asthma were  
19 significantly lower in comparison with COPD. The asthma group also had significantly lower  
20 number of neutrophils in comparison with bronchiectasis and COPD. The proportion of  
21 eosinophils was significantly higher in COPD and asthma compared with healthy controls,  
22 while the number of eosinophils was significantly higher in all three obstructive airways  
23 diseases compared with healthy controls.  
24  
25  
26  
27  
28  
29  
30  
31  
32  
33  
34  
35  
36

### 37 **Neutrophil subsets**

38  
39  
40 All three neutrophil subsets were identified in the BL of all participants. The numbers of  
41 normal neutrophils were significantly higher in bronchiectasis and COPD group in comparison  
42 to healthy and asthma (Figure 2A). Numbers of banded neutrophils were highest in those  
43 participants with bronchiectasis compared with both healthy and asthma groups (Figure 2B).  
44 Hypersegmented neutrophil numbers were significantly increased in all the obstructive airway  
45 disease groups compared with healthy controls and increased in participants with COPD  
46 compared with asthma and bronchiectasis (Figure 2C).  
47  
48  
49  
50  
51  
52  
53  
54  
55  
56  
57  
58  
59  
60

1  
2  
3 When considering the relative distribution of neutrophil subtypes by proportion (shown in  
4 Figure 2 D-F), participants with COPD had a significantly reduced proportion of normal and  
5 banded neutrophils and subsequently a significantly increased proportion of hypersegmented  
6 neutrophils.  
7  
8  
9  
10  
11  
12  
13  
14  
15  
16  
17  
18  
19  
20  
21  
22  
23  
24  
25  
26  
27  
28  
29  
30  
31  
32  
33  
34  
35  
36  
37  
38  
39  
40  
41  
42  
43  
44  
45  
46  
47  
48  
49  
50  
51  
52  
53  
54  
55  
56  
57  
58  
59  
60

For peer review only

Table 1: Clinical characteristics of participants with bronchiectasis, asthma, COPD, and healthy controls.

|                                              | Bronchiectasis                | COPD                         | Asthma                          | Healthy                                 | p value |
|----------------------------------------------|-------------------------------|------------------------------|---------------------------------|-----------------------------------------|---------|
| n                                            | 20                            | 20                           | 40                              | 20                                      |         |
| Age                                          | 68.3 (7.3)                    | 69.7 ( 9.8)                  | 65.0 (7.4)                      | 61.3 (9.7)                              | 0.289   |
| Males, n (%)                                 | 7 (35)                        | 15 (75)                      | 18 (45)                         | 9 (45)                                  | 0.062   |
| Ex-smoker, n (%)                             | 0 (0)                         | 20.00 (100.00) <sup>^φ</sup> | 15.00 (37.50) <sup>φ#</sup>     | 2.00 (10.00)                            | <0.001  |
| Smoking (pack years)                         | --                            | 37.5 (20.5-60.0)             | 10 (4-30) <sup>#</sup>          | (5,5)                                   | 0.005   |
| FEV <sub>1</sub> % predicted                 | 92.0 (17.8) <sup>#</sup>      | 57.5 (17.0) <sup>^</sup>     | 72.9 (20.1) <sup>^φ#</sup>      | 98.6 (12.1)<br>(n=19)                   | <0.001  |
| FEV <sub>1</sub> /FVC (%)                    | 73.0 (67.5-78.5) <sup>#</sup> | 56.5 (39.0- 65.5)            | 67.0 (59.8-74.0) <sup>^ #</sup> | 75.0 (69.0-80.0) <sup>#</sup><br>(n=19) | <0.001  |
| Taking ICS n (%)                             | --                            | 9 (45)                       | 38 (95) <sup>#</sup>            | --                                      | <0.001  |
| BDP equivalent ICS dose μg day <sup>-1</sup> | --                            | 1733.33 (529.15)             | 965.79 (400.86) <sup>#</sup>    | --                                      | <0.001  |
| Bacterial pathogen, n (%)                    | 8 (40) <sup>^</sup>           | 7 (37) <sup>^</sup>          | 12 (30) <sup>^</sup>            | 0 (0)                                   | 0.006   |

Data are presented as mean ± SD or median (interquartile range; q1- q3) unless otherwise stated. FEV<sub>1</sub>: force expiratory volume in 1s; FVC: Forced vital capacity; ICS: Inhaled corticosteroids; BDP equivalent: ICS dose is calculated as beclomethasone dipropionate equivalent, where 1μg of beclomethasone =

1  
2  
3  
4  
5  
6  
7  
8  
9  
10  
11  
12  
13  
14  
15  
16  
17  
18  
19  
20  
21  
22  
23  
24  
25  
26  
27  
28  
29  
30  
31  
32  
33  
34  
35  
36  
37  
38  
39  
40  
41  
42  
43  
44  
45  
46  
47

1µg budesonide = 0.5µg fluticasone. ^p<0.0125 compared with healthy controls, φ p<0.0125 compared with bronchiectasis and # p<0.0125 compared with COPD.

For peer review only

Table 2: Inflammatory cell count of participants with bronchiectasis, asthma, COPD, and healthy controls.

|                                                | Bronchiectasis                   | COPD                              | Asthma                           | Healthy             | p value* |
|------------------------------------------------|----------------------------------|-----------------------------------|----------------------------------|---------------------|----------|
| Total cells x 10 <sup>6</sup> /mL              | 0.61 (0.17-1.67) <sup>^</sup>    | 0.51 (0.15-1.92) <sup>^</sup>     | 0.16 (0.10-0.34) <sup>φ</sup>    | 0.08 (0.05- 0.21)   | <0.001   |
| Viability, %                                   | 82.1 (75.0-90.7) <sup>^</sup>    | 87.75 (73.60-93.50) <sup>^</sup>  | 78.2 (62.4-87.2)                 | 75.0 (72.2-85.9)    | 0.008    |
| Neutrophil, %                                  | 65.00 (37.88-83.50) <sup>^</sup> | 76.88 (69.88-85.13) <sup>^</sup>  | 56.63 (23.37-71.62) <sup>#</sup> | 28.25 (14.75-63.50) | <0.001   |
| Neutrophils x 10 <sup>4</sup> cells/mL         | 36.60 (5.11-139.46) <sup>^</sup> | 35.17 (11.34-149.70) <sup>^</sup> | 3.03 (7.89-23.98) <sup>φ#</sup>  | 3.18 (1.51-5.03)    | <0.001   |
| Eosinophils, %                                 | 1.13 (0.50-6.13)                 | 3.75 (1.13-8.88) <sup>^</sup>     | 2.25 (1.00-11.75) <sup>^</sup>   | 1.00 (0.75-1.25)    | 0.039    |
| Eosinophils x 10 <sup>4</sup> cells/mL         | 0.72 (0.43-2.49) <sup>^</sup>    | 1.79 (0.43-3.87) <sup>^</sup>     | 0.59 (0.11-3.07) <sup>^</sup>    | 0.09 (0.05-0.23)    | <0.001   |
| Macrophages,%                                  | 18.38 (11.00-33.25)              | 15.75 (9.25-21.65) <sup>^</sup>   | 25.25 (9.25-40.50)               | 29.25 (17.00-63.12) | 0.033    |
| Macrophages x 10 <sup>4</sup> cells/mL         | 11.96 (6.67-22.24) <sup>^</sup>  | 6.63 (2.62-18.90)                 | 4.43 (2.01-7.80) <sup>φ</sup>    | 2.10 (1.42-6.43)    | 0.008    |
| Lymphocytes, %                                 | 0.75 (0.13-1.62)                 | 0.25 (0.00-1.25) <sup>^</sup>     | 0.50 (0.00-1.50)                 | 1.5 (0.25-5.13)     | 0.038    |
| Lymphocyte x 10 <sup>4</sup> cells/mL          | 0.30 (0.01-0.91)                 | 0.11 (0.00-0.89)                  | 0.08 (0.00-0.36)                 | 0.18 (0.05-0.42)    | 0.383    |
| Columnar epithelial cells, %                   | 2.75 (0.88-10.75)                | 0.50 (0.00-3.38) <sup>^</sup>     | 4.75 (2.00-10.75) <sup>#</sup>   | 9.50 (4.88-23.63)   | <0.001   |
| Columnar epithelial x 10 <sup>4</sup> cells/mL | 2.16 (0.54-2.80) <sup>#</sup>    | 0.28 (0.00-0.56) <sup>^</sup>     | 1.02 (0.44-2.10) <sup>#</sup>    | 0.88 (0.38-2.38)    | <0.001   |

Data are presented as median (interquartile range; q1- q3) unless otherwise stated.

\* Kruskal-Wallis test, ^ p<0.0125 compared with healthy, φ p<0.0125 compared with bronchiectasis, and # p<0.0125 compared with COPD.

## Association of neutrophil subsets with clinical characteristics in obstructive airway disease

There was a significant negative correlation between the proportion of hypersegmented neutrophils with both FEV<sub>1</sub>% predicted ( $\rho = -0.278$ ,  $p=0.012$ ) and FEV<sub>1</sub>/FVC% ( $\rho = -0.313$ ,  $p=0.005$ ) (Figure 3) in participants with obstructive airway disease. While the same was not observed for banded neutrophils [FEV<sub>1</sub>% predicted ( $\rho = 0.151$ ,  $p=0.183$ ), FEV<sub>1</sub>/FVC% ( $\rho = 0.191$ ,  $p=0.090$ )] and normal neutrophils [FEV<sub>1</sub>% predicted ( $\rho = 0.163$ ,  $p=0.149$ ), FEV<sub>1</sub>/FVC% ( $\rho = 0.204$ ,  $p=0.069$ )]. There was no association between the total neutrophil proportion with either FEV<sub>1</sub>% predicted ( $\rho = -0.170$ ,  $p=0.132$ ) or FEV<sub>1</sub>/FVC% ( $\rho = -0.151$ ,  $p=0.181$ ).

In participants with COPD, the proportion of hypersegmented neutrophils was positively associated with proportion of eosinophils ( $\rho = 0.597$ ,  $p=0.006$ ) (Figure 4A) and negatively associated with cell viability ( $\rho = -0.738$ ,  $p<0.001$ ) (Figure 4B). This association was not observed in any other group or in the overall population (data not shown).

To explore the correlation between proportion of eosinophils and hypersegmented neutrophils further we decided to examine the COPD participants according to their inflammatory subtype categorised as eosinophilic COPD (E-COPD) ( $\geq 3\%$  eosinophils) and non-eosinophilic COPD (NE-COPD) ( $< 3\%$  eosinophils).

### Eosinophilic and non-eosinophilic COPD

Twelve participants were characterized as eosinophilic COPD (E-COPD) and eight participants were characterized as non-eosinophilic COPD (NE-COPD). The smoking pack-years were significantly higher in the NE-COPD group compared with E-COPD group (Table 3). The NE-

COPD group also had a significantly elevated total cell count and cell viability along with significantly elevated proportion and number of neutrophils in comparison with E-COPD. The number and proportion of eosinophils were significantly higher in ECOPD.

*Table 3: Clinical characteristics and cell counts of participants with E-COPD and NE-COPD.*

|                                                | E-COPD (n = 12)     | NE-COPD (n = 8)     | P value |
|------------------------------------------------|---------------------|---------------------|---------|
| Age                                            | 70.92 (9.87)        | 67.75 (10.02)       | 0.494   |
| Males, n (%)                                   | 8 (66.67)           | 7 (87.50)           | 0.603   |
| Ex-smoker, n (%)                               | 12 (100.00)         | 8 (100.00)          | 1.000   |
| Smoking pack years                             | 33.17 (16.74)       | 56.38 (31.55)       | 0.045   |
| FEV <sub>1</sub> % Predicted                   | 59.17 (16.45)       | 55.00 (18.53)       | 0.604   |
| FEV <sub>1</sub> /FVC (%)                      | 51.25(14.68)        | 53.38 (18.65)       | 0.779   |
| Taking ICS n (%)                               | 6 (50.00)           | 3 (37.50)           | 0.465   |
| BDP equivalent ICS dose $\mu\text{g day}^{-1}$ | 2000 (800-2000)     | 2000 (2000-2000)    | 0.285   |
| Bacterial pathogen, n (%)                      | 5 (41.67)           | 2 (25.00)           | 0.392   |
| Total cells x 10 <sup>6</sup> / mL             | 0.57 (0.53)         | 1.94 (1.68)         | 0.016   |
| Viability, %                                   | 76.66 (14.63)       | 91.52 (6.39)        | 0.015   |
| Neutrophil, %                                  | 74.13 (65.63-77.75) | 85.50 (77.00-91.75) | 0.025   |
| Neutrophils x 10 <sup>4</sup> cells/mL         | 43.12 (41.86)       | 169.43(152.59)      | 0.013   |
| Eosinophils, %                                 | 8.92 (5.66)         | 0.97 (0.69)         | 0.001   |
| Eosinophils x 10 <sup>4</sup> cells/mL         | 4.34 (4.10)         | 1.00 (1.05)         | 0.038   |
| Macrophages, %                                 | 17.38 (12.00-23.15) | 11.25 (7.75-16.88)  | 0.177   |
| Lymphocytes, %                                 | 0.46 (0.51)         | 0.72 (0.65)         | 0.328   |
| Columnar epithelial cells, %                   | 1.00 (0.13-3.38)    | 0.13 (0.00-2.88)    | 0.453   |

Data are presented as mean  $\pm$  SD or median (interquartile range; q1- q3) unless otherwise stated. FEV<sub>1</sub>: forced expiratory volume in 1s; FVC: Forced vital capacity; ICS: Inhaled corticosteroids; BDP equivalent:



ICS dose is calculated as beclomethasone dipropionate equivalent, where 1µg of beclomethasone = 1µg budesonide = 0.5µg fluticasone.

### Neutrophil subsets in eosinophilic and non-eosinophilic COPD

While not statistically different, participants with E-COPD had half the number of banded neutrophils and ten times fewer normal neutrophils in comparison to those with NE-COPD (Table 4). The proportion of normal neutrophils were significantly reduced in E-COPD while proportion of hypersegmented neutrophils were significantly elevated.

Table 4: Numbers and proportion of neutrophil subsets in eosinophilic (E-COPD) and non-eosinophilic COPD participants.

| Neutrophil type                       | E-COPD (n = 12)          | NE-COPD (n = 8)            | P value * |
|---------------------------------------|--------------------------|----------------------------|-----------|
| Normal, x 10 <sup>2</sup> /mL         | 1306.24 (876.66-3484.33) | 14893.66 (880.95-25103.90) | 0.165     |
| Banded, x 10 <sup>2</sup> /mL         | 63.41 (27.09-241.98)     | 128.20 (25.50-1982.52)     | 0.537     |
| Hypersegmented, x 10 <sup>2</sup> /mL | 811.59 (183.14-2136.15)  | 1193.40 (258.75-2282.96)   | 0.817     |
|                                       |                          |                            |           |
| Normal, %                             | 65.50 (46.50-74.00)      | 80.00 (75.00-86.00)        | 0.031     |
| Banded, %                             | 4.00 (2.00-4.50)         | 4.00 (2.00-6.50)           | 0.906     |
| Hypersegmented, %                     | 33.00 (22.00-50.50)      | 14.00 (4.50-21.50)         | 0.037     |

Data are presented as median (interquartile range; q1- q3) unless otherwise stated. \* Two-sample Wilcoxon's rank sum test.

## DISCUSSION

The study identified three morphologically distinct subsets of neutrophils i.e. banded, normal, and hypersegmented in the BL of participants with chronic obstructive airways disease patients and healthy controls. There were a significantly higher number of hypersegmented neutrophils in those with obstructive airway disease compared with healthy controls. The proportion of hypersegmented neutrophils was associated with lower FEV<sub>1</sub> and more severe airflow obstruction (FEV<sub>1</sub>/FVC %) in obstructive airway disease participants and with the presence of eosinophilic airway inflammation in COPD.

The concept of morphological heterogeneity in neutrophil population has recently emerged<sup>21</sup>. We have examined neutrophil heterogeneity in the bronchial lavage of obstructive airway disease participants and healthy controls. The reason for neutrophil heterogeneity is unclear but may be attributable to the different stages of cell maturation in the bone marrow before transition to the tissue, or alternatively, neutrophils might change their morphology during the course of inflammation to adjust with the stressors in inflamed airways<sup>5 22</sup>.

Banded neutrophils are also known as immature neutrophils and are deemed incompetent in anti-microbial immune functions as reported in the systemic circulation of sepsis patients<sup>23</sup>. The emergence of banded neutrophils in the airway can occur after depletion of mature neutrophils in bone marrow following excessive demand during acute inflammation<sup>20</sup>.

The hypersegmented morphology of the neutrophil implies increased maturation compared with banded and normal neutrophils<sup>18</sup>. Maturation is thought to occur in inflamed airways due to the presence of a cytokine rich environment consisting of pro-survival mediators<sup>24</sup>. The mechanism behind formation of hypersegmented neutrophils are known to be linked with the life cycle of the neutrophils. The increase in survival cause the nucleus of neutrophil to develop more indentation and segmentation, and hence the hypersegmented neutrophils are also called as “old neutrophils”<sup>25</sup>.

1  
2  
3 The ability of a chemoattractant rich milieu to change the phenotype of neutrophils was recently  
4 shown when neutrophils from the blood of healthy volunteers were incubated with the  
5 broncoalveolar lavage from a patient with ARDS. These neutrophils altered their phenotype, with  
6 an increase in those with a hypersegmented morphology<sup>19</sup>. It may be possible that a similar  
7 process is occurring chronically in the airways of obstructive airway disease participants, who  
8 generally have higher levels of pro-inflammatory cytokines and inflammatory mediators. Previous  
9 studies have demonstrated that hypersegmented neutrophils in the circulation demonstrate low  
10 expression of L-selectins, which may reduce their anchoring ability on endothelial cells and hence  
11 reduce their chances to egress into inflamed airways<sup>26</sup>. Thus, it is possible that the hypersegmented  
12 neutrophils we observed in our study have not directly come from circulation and instead may  
13 have become hypersegmented in the airways under the influence of pro-survival mediators.

14  
15 Mediators that promote neutrophil survival and can be present in the airways include; GM-CSF,  
16 chemokines like CXCL-8 and lipid mediators such as serum amyloid A<sup>22</sup>. GM-CSF and CXCL-8  
17 are known to enhance neutrophil survival by promoting the expression of anti-apoptotic proteins  
18 like survivins and by preventing TNF- $\alpha$  mediated apoptosis<sup>27 28</sup>. While serum amyloid A is known  
19 to prolong neutrophil longevity by preventing mitochondrial damage and decreasing caspase-3  
20 (apoptotic protein) activity<sup>29</sup>. Our past studies have reported elevated levels of CXCL-8 in sputum  
21 samples of neutrophilic asthma, bronchiectasis<sup>30</sup>, and COPD patients<sup>31</sup>. Beside this, we have also  
22 reported that elevated levels of serum amyloid A in COPD was associated with neutrophilic  
23 inflammation in airways and this was refractory to corticosteroids<sup>32</sup>. This suggests that the elevated  
24 presence of these markers might have played some role in enhancing the survival of neutrophils in  
25 airways and promoting the presence of hypersegmented neutrophils.

26  
27 In this study, we also reported a positive correlation between eosinophils and hypersegmented  
28 neutrophils proportion in COPD participants along with significantly elevated proportion of  
29 hypersegmented neutrophils in E-COPD participants. The presence of eosinophils in airways can

1  
2  
3 further elevate the level of GM-CSF due to their own production of this cytokine<sup>33</sup>, which can  
4  
5 further promote maturation of neutrophils. Beside this, the use of ICS to control eosinophilic  
6  
7 inflammation may enhance neutrophil survival in the inflamed airways by increasing the activity of  
8  
9 anti-apoptotic proteins such as Mcl-1 (induced myeloid leukaemia cell differentiation protein) and  
10  
11 IAPs (inhibitor of apoptosis proteins) in neutrophils<sup>34</sup>. This increased maturity and prevention of  
12  
13 death may result in an increased proportion of hypersegmented neutrophils.  
14  
15

16  
17 The significant association between the proportion of hypersegmented neutrophils with FEV<sub>1</sub> and  
18  
19 severe airflow obstruction suggests that where hypersegmented neutrophils are common, airway  
20  
21 obstruction is poor. This could be a result of high oxidative burst produced by hypersegmented  
22  
23 neutrophils as observed in previous studies, in which hypersegmented neutrophil exhibited high  
24  
25 oxidative burst after ex-vivo stimulation<sup>18 19</sup>. The generation of high oxidative burst by  
26  
27 neutrophils may also impair their timely clearance from the airway<sup>35</sup> and can trigger a vicious  
28  
29 cycle of neutrophils influx into the airways<sup>6</sup>. The impairment of neutrophil clearance in airway  
30  
31 may cause necrosis of neutrophils which can spill its cytotoxic content such as reactive oxygen  
32  
33 species and proteolytic enzymes like neutrophil elastase in the lumen of airways<sup>36</sup>. This can  
34  
35 further damage airway wall and promote mucus hypersecretion which may result in significant  
36  
37 decline in FEV<sub>1</sub> as earlier reported in a study on COPD patients<sup>37</sup>. Further research is needed to  
38  
39 understand if hypersegmented neutrophils are common as a result of more severe disease or  
40  
41 conversely if they influence disease severity.  
42  
43  
44

45  
46 The cross-sectional nature of study is a limitation in properly establishing the cause and effect of  
47  
48 relationship of neutrophil heterogeneity in airways. A further detailed ex-vivo study of influence  
49  
50 of pathogen, pro-survival mediators, and current medications like ICS on neutrophil subsets  
51  
52 morphology, surface expressions, and functional behaviour is needed to provide a better  
53  
54 understanding of the formation of hypersegmented neutrophils in the airways and subsequently in  
55  
56  
57  
58  
59

1  
2  
3 developing a more comprehensive strategy for assessment and management of airway  
4  
5 neutrophilia.  
6

## 7 8 **CONCLUSION**

9  
10 We have shown the presence of three morphologically different subsets of neutrophils in the  
11  
12 airways of healthy and obstructive airway disease participants i.e. asthma, COPD, and  
13  
14 bronchiectasis. The increased proportion of hypersegmented neutrophils in the airways of  
15  
16 obstructive airway disease participants was associated with reduced lung function of these  
17  
18 participants. The proportion of hypersegmented neutrophils was highest in COPD participants in  
19  
20 comparison with all other groups.  
21  
22  
23  
24  
25  
26

## 27 **ACKNOWLEDGEMENTS**

28  
29 We acknowledge technical support from Andrew Reid, Michelle Gleeson, Kellie Fakes and  
30  
31 Bridgette Donati and clinical support from Lorissa Hopkins and Douglas Dorahy of The Priority  
32  
33 Research Centre for Healthy Lungs.  
34  
35  
36  
37  
38  
39

40 **CONTRIBUTORS:** JLS developed the idea and designed the study. JLS also supervised and  
41  
42 coordinated the study throughout. RL performed the subtype counting and wrote the  
43  
44 manuscript which was further refined and edited by JLS, PABW, KB and DB. PABW  
45  
46 performed the bronchoscopy, KB supervised the bronchial lavage processing and cytospin  
47  
48 preparation and DB supervised the statistical analysis.  
49  
50  
51  
52  
53

54 **COMPETING INTERESTS:** None.  
55  
56  
57  
58  
59

**FUNDING:** This research received no specific grant from any funding agency in the public, commercial or not for profit sector.

**DATA SHARING STATEMENT:** Raw data can be obtained by contacting the corresponding author.

## REFERENCES

1. Wright HL, Moots RJ, Bucknall RC, et al. Neutrophil function in inflammation and inflammatory diseases. *Rheumatology (Oxford)* 2010;49(9):1618-31.
2. Amulic B, Cazalet C, Hayes GL, et al. Neutrophil function: from mechanisms to disease. *Annu Rev Immunol* 2012;30:459-89.
3. Zuo L, Lucas K, Fortuna CA, et al. Molecular Regulation of Toll-like Receptors in Asthma and COPD. *Front Physiol* 2015;6:312.
4. Konrad FM, Reutershan J. CXCR2 in acute lung injury. *Mediators Inflamm* 2012;2012:740987.
5. Bruijnzeel PL, Uddin M, Koenderman L. Targeting neutrophilic inflammation in severe neutrophilic asthma: can we target the disease-relevant neutrophil phenotype? *J Leukoc Biol* 2015;98(4):549-56.
6. Simpson JL, Phipps S, Gibson PG. Inflammatory mechanisms and treatment of obstructive airway diseases with neutrophilic bronchitis. *Pharmacol Ther* 2009;124(1):86-95.
7. Essilfie AT, Simpson JL, Dunkley ML, et al. Combined Haemophilus influenzae respiratory infection and allergic airways disease drives chronic infection and features of neutrophilic asthma. *Thorax* 2012;67(7):588-99.
8. Kirsty H, Rahul S, Richard R, et al. Defining Inflammatory Groups Within a COPD Cohort. B43 COPD: PHENOTYPES AND CLINICAL OUTCOMES: American Thoracic Society 2016:A3514-A14.
9. McDonald VM, Higgins I, Wood LG, et al. Multidimensional assessment and tailored interventions for COPD: respiratory utopia or common sense? *Thorax* 2013;68(7):691-4.
10. Dente FL, Bilotta M, Bartoli ML, et al. Neutrophilic Bronchial Inflammation Correlates with Clinical and Functional Findings in Patients with Noncystic Fibrosis Bronchiectasis. *Mediat Inflamm* 2015;2015:642503.
11. Reddel HK, Bateman ED, Becker A, et al. A summary of the new GINA strategy: a roadmap to asthma control. *Eur Respir J* 2015;46(3):622-39.
12. Bathoorn E, Kerstjens H, Postma D, et al. Airways inflammation and treatment during acute exacerbations of COPD. *International Journal of Chronic Obstructive Pulmonary Disease* 2008;3(2):217-29.
13. Chang AB, Bell SC, Byrnes CA, et al. Chronic suppurative lung disease and bronchiectasis in children and adults in Australia and New Zealand. *Med J Aust* 2010;193(6):356-65.
14. Simpson JL, Scott R, Boyle MJ, et al. Inflammatory subtypes in asthma: assessment and identification using induced sputum. *Respirology* 2006;11(1):54-61.

15. Beeh KM, Beier J. Handle with care: targeting neutrophils in chronic obstructive pulmonary disease and severe asthma? *Clin Exp Allergy* 2006;36(2):142-57.
16. Mardh CK, Root J, Uddin M, et al. Targets of Neutrophil Influx and Weaponry: Therapeutic Opportunities for Chronic Obstructive Airway Disease. *J Immunol Res* 2017;2017:5273201.
17. Shaw DE, Berry MA, Hargadon B, et al. Association between neutrophilic airway inflammation and airflow limitation in adults with asthma. *Chest* 2007;132(6):1871-5.
18. Pillay J, Kamp VM, van Hoffen E, et al. A subset of neutrophils in human systemic inflammation inhibits T cell responses through Mac-1. *J Clin Invest* 2012;122(1):327-36.
19. Juss JK, House D, Amour A, et al. Acute Respiratory Distress Syndrome Neutrophils Have a Distinct Phenotype and Are Resistant to Phosphoinositide 3-Kinase Inhibition. *Am J Respir Crit Care Med* 2016;194(8):961-73.
20. Cortjens B, Ingelse SA, Calis JC, et al. Neutrophil subset responses in infants with severe viral respiratory infection. *Clin Immunol* 2017;176:100-06.
21. Silvestre-Roig C, Hidalgo A, Soehnlein O. Neutrophil heterogeneity: implications for homeostasis and pathogenesis. *Blood* 2016;127(18):2173-81.
22. Kolaczowska E, Kubes P. Neutrophil recruitment and function in health and inflammation. *Nat Rev Immunol* 2013;13(3):159-75.
23. Taneja R, Sharma AP, Hallett MB, et al. Immature circulating neutrophils in sepsis have impaired phagocytosis and calcium signaling. *Shock* 2008;30(6):618-22.
24. Uddin M, Nong G, Ward J, et al. Prosurvival activity for airway neutrophils in severe asthma. *Thorax* 2010;65(8):684-9.
25. Pillay J, Tak T, Kamp VM, et al. Immune suppression by neutrophils and granulocytic myeloid-derived suppressor cells: similarities and differences. *Cell Mol Life Sci* 2013;70(20):3813-27.
26. Kamp VM, Pillay J, Lammers JW, et al. Human suppressive neutrophils CD16bright/CD62Ldim exhibit decreased adhesion. *Journal of leukocyte biology* 2012;92(5):1011-20.
27. Gabelloni ML, Trevani AS, Sabatté J, et al. Mechanisms regulating neutrophil survival and cell death. *Seminars in Immunopathology* 2013;35(4):423-37.
28. Kettritz R, Gaido ML, Haller H, et al. Interleukin-8 delays spontaneous and tumor necrosis factor-alpha-mediated apoptosis of human neutrophils. *Kidney Int* 1998;53(1):84-91.
29. Kebir DE, Jozsef L, Khreiss T, et al. Serum amyloid A (SAA) prevents mitochondrial dysfunction and delays constitutive neutrophil apoptosis. *The FASEB Journal* 2007;21(5):A13.
30. Simpson JL, Grissell TV, Douwes J, et al. Innate immune activation in neutrophilic asthma and bronchiectasis. *Thorax* 2007;62(3):211-8.
31. Baines KJ, Simpson JL, Gibson PG. Innate Immune Responses Are Increased in Chronic Obstructive Pulmonary Disease. *PLoS ONE* 2011;6(3):e18426.
32. Bozinovski S, Uddin M, Vlahos R, et al. Serum amyloid A opposes lipoxin A(4) to mediate glucocorticoid refractory lung inflammation in chronic obstructive pulmonary disease. *Proc Natl Acad Sci U S A* 2012;109(3):935-40.
33. Esnault S, Malter JS. GM-CSF regulation in eosinophils. *Arch Immunol Ther Exp (Warsz)* 2002;50(2):121-30.
34. Saffar AS, Ashdown H, Gounni AS. The Molecular Mechanisms of Glucocorticoids-Mediated Neutrophil Survival. *Current Drug Targets* 2011;12(4):556-62.
35. Simpson JL, Gibson PG, Yang IA, et al. Impaired macrophage phagocytosis in non-eosinophilic asthma. *Clin Exp Allergy* 2013;43(1):29-35.
36. Kim S, Nadel JA. Role of neutrophils in mucus hypersecretion in COPD and implications for therapy. *Treat Respir Med* 2004;3(3):147-59.
37. Vestbo J, Prescott E, Lange P. Association of chronic mucus hypersecretion with FEV1 decline and chronic obstructive pulmonary disease morbidity. Copenhagen City Heart Study Group. *Am J Respir Crit Care Med* 1996;153(5):1530-5.



**FIGURES LEGENDS:**

**Figure 1:** Subtypes of neutrophils characterized as per number of lobes in their nucleus. (A) A representative pictomicrograph of BL cytospin of obstructive airway disease participants (X 100 original magnification, MGG stain) consist of (B) Banded neutrophil, (c) Normal neutrophil, and (D) Hypersegmented neutrophil.

**Figure 2:** Neutrophil subtype number (A-C) and neutrophil subtype proportion (D-F) in BL of participants with bronchiectasis, COPD, asthma, and healthy controls.  $\wedge p < 0.0125$  compared with healthy controls, \*  $p < 0.0125$  compared with asthma and #  $p < 0.0125$  compared with COPD.

**Figure 3:** Scatterplot of hypersegmented neutrophil proportion vs FEV<sub>1</sub>% predicted (A) and FEV<sub>1</sub>/FVC (B) in BL of obstructive airway disease participant's.

**Figure 4:** (A) Scatterplot of hypersegmented neutrophils proportion vs eosinophils proportion, (B) viability of total cells in BL of COPD participants.



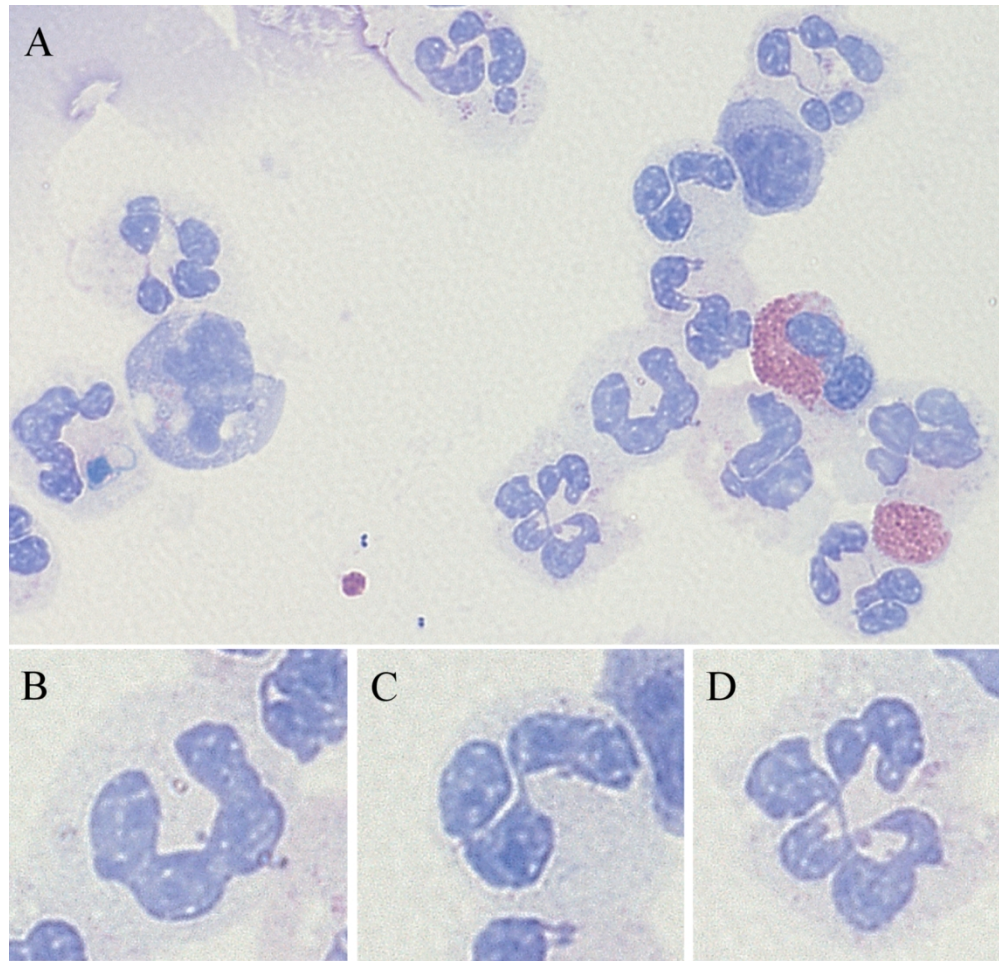

Figure 1: Subtypes of neutrophils characterized as per number of lobes in their nucleus. (A) A representative pictomicrograph of BL cytospin of obstructive airway disease participants( X 100 original magnification, MGG stain) consist of (B) Banded neutrophil, (c) Normal neutrophil, and (D) Hypersegmented neutrophil.

153x146mm (300 x 300 DPI)

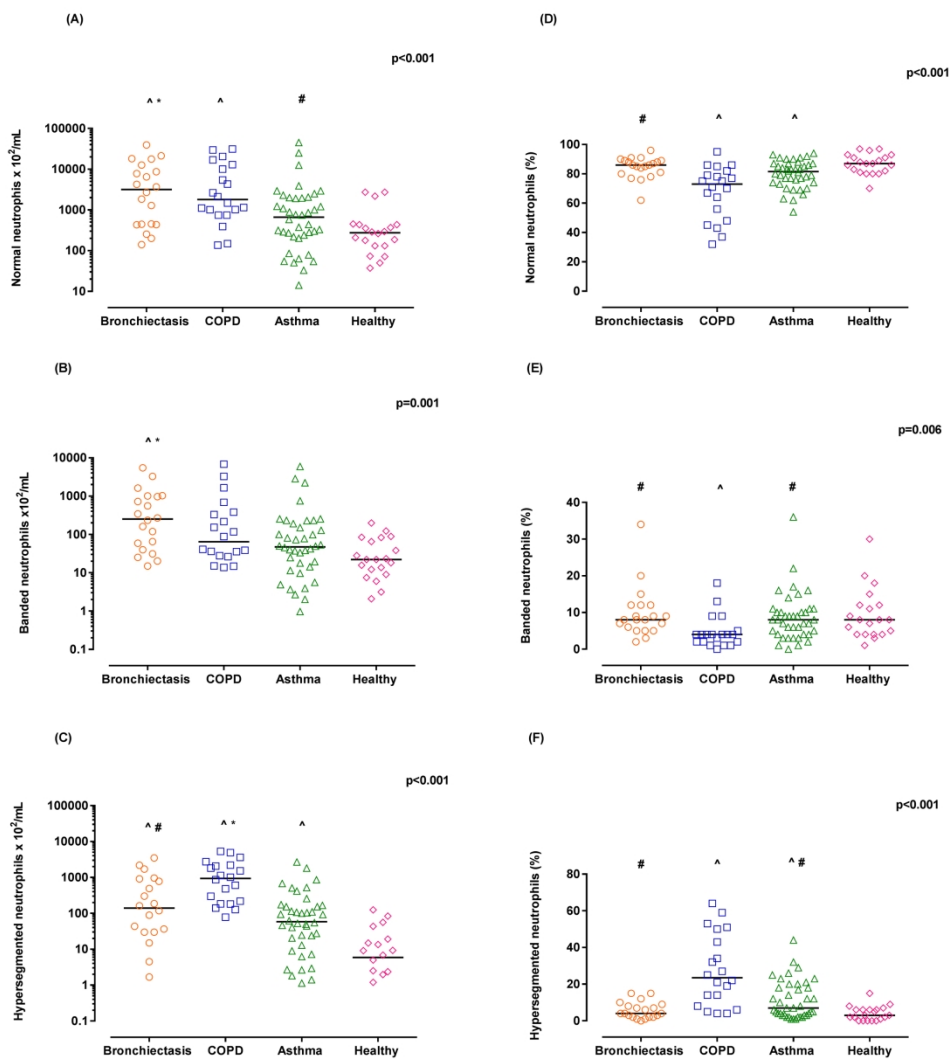

Figure 2: Neutrophil subtype number (A-C) and neutrophil subtype proportion (D-F) in BL of participants with bronchiectasis, COPD, asthma, and healthy controls. ^p<0.0125 compared with healthy controls, \* p<0.0125 compared with asthma and # p<0.0125 compared with COPD.

237x260mm (300 x 300 DPI)

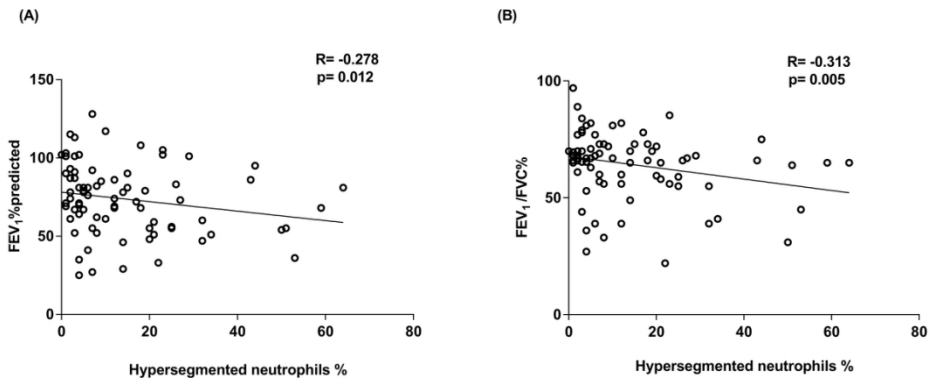

Figure 3: Scatterplot of hypersegmented neutrophil proportion vs FEV<sub>1</sub>% predicted (A) and FEV<sub>1</sub>/FVC (B) in BL of obstructive airway disease participant's.

111x48mm (300 x 300 DPI)

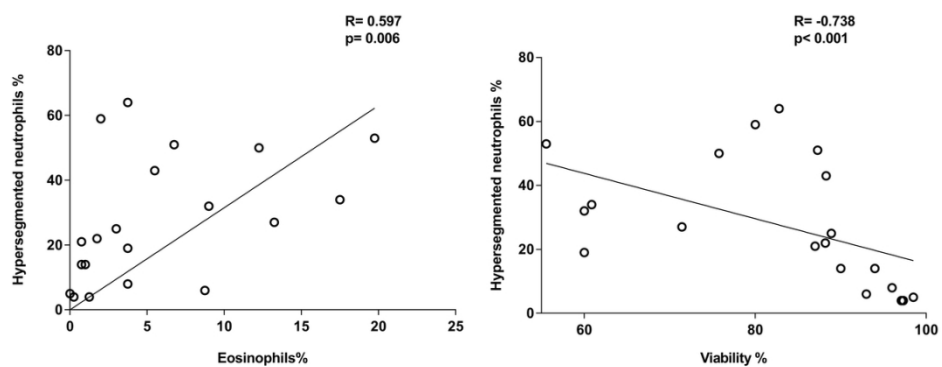

Figure 4: (A) Scatterplot of hypersegmented neutrophils proportion vs eosinophils proportion, (B) viability of total cells in BL of COPD participants.

108x44mm (300 x 300 DPI)

# Reporting checklist for cross sectional study.

Based on the STROBE cross sectional guidelines.

## Instructions to authors

Complete this checklist by entering the page numbers from your manuscript where readers will find each of the items listed below.

Your article may not currently address all the items on the checklist. Please modify your text to include the missing information. If you are certain that an item does not apply, please write "n/a" and provide a short explanation.

Upload your completed checklist as an extra file when you submit to a journal.

In your methods section, say that you used the STROBE cross sectional reporting guidelines, and cite them as:

von Elm E, Altman DG, Egger M, Pocock SJ, Gotsche PC, Vandembroucke JP. The Strengthening the Reporting of Observational Studies in Epidemiology (STROBE) Statement: guidelines for reporting observational studies.

|                        |                     | Reporting Item                                                                                  | Page Number |
|------------------------|---------------------|-------------------------------------------------------------------------------------------------|-------------|
| Title                  | <a href="#">#1a</a> | Indicate the study's design with a commonly used term in the title or the abstract              | 3           |
| Abstract               | <a href="#">#1b</a> | Provide in the abstract an informative and balanced summary of what was done and what was found | 3           |
| Background / rationale | <a href="#">#2</a>  | Explain the scientific background and rationale for the investigation being reported            | 5           |
| Objectives             | <a href="#">#3</a>  | State specific objectives, including any prespecified hypotheses                                | 6           |
| Study design           | <a href="#">#4</a>  | Present key elements of study design early in the paper                                         | 6           |
| Setting                | <a href="#">#5</a>  | Describe the setting, locations, and relevant dates, including periods of                       | 6-7         |

|    |                            |                                                                                                                                                                                                                                                                                         |                                                                                                                                                                           |
|----|----------------------------|-----------------------------------------------------------------------------------------------------------------------------------------------------------------------------------------------------------------------------------------------------------------------------------------|---------------------------------------------------------------------------------------------------------------------------------------------------------------------------|
|    |                            | recruitment, exposure, follow-up, and data collection                                                                                                                                                                                                                                   |                                                                                                                                                                           |
| 1  |                            |                                                                                                                                                                                                                                                                                         |                                                                                                                                                                           |
| 2  |                            |                                                                                                                                                                                                                                                                                         |                                                                                                                                                                           |
| 3  |                            |                                                                                                                                                                                                                                                                                         |                                                                                                                                                                           |
| 4  | Eligibility criteria       | <a href="#">#6a</a> Give the eligibility criteria, and the sources and methods of selection of participants.                                                                                                                                                                            | 6-7                                                                                                                                                                       |
| 5  |                            |                                                                                                                                                                                                                                                                                         |                                                                                                                                                                           |
| 6  |                            |                                                                                                                                                                                                                                                                                         |                                                                                                                                                                           |
| 7  |                            |                                                                                                                                                                                                                                                                                         |                                                                                                                                                                           |
| 8  |                            | <a href="#">#7</a> Clearly define all outcomes, exposures, predictors, potential confounders, and effect modifiers. Give diagnostic criteria, if applicable                                                                                                                             | 6-7                                                                                                                                                                       |
| 9  |                            |                                                                                                                                                                                                                                                                                         |                                                                                                                                                                           |
| 10 |                            |                                                                                                                                                                                                                                                                                         |                                                                                                                                                                           |
| 11 |                            |                                                                                                                                                                                                                                                                                         |                                                                                                                                                                           |
| 12 |                            |                                                                                                                                                                                                                                                                                         |                                                                                                                                                                           |
| 13 |                            |                                                                                                                                                                                                                                                                                         |                                                                                                                                                                           |
| 14 | Data sources / measurement | <a href="#">#8</a> For each variable of interest give sources of data and details of methods of assessment (measurement). Describe comparability of assessment methods if there is more than one group. Give information separately for for exposed and unexposed groups if applicable. | 6-7                                                                                                                                                                       |
| 15 |                            |                                                                                                                                                                                                                                                                                         |                                                                                                                                                                           |
| 16 |                            |                                                                                                                                                                                                                                                                                         |                                                                                                                                                                           |
| 17 |                            |                                                                                                                                                                                                                                                                                         |                                                                                                                                                                           |
| 18 |                            |                                                                                                                                                                                                                                                                                         |                                                                                                                                                                           |
| 19 |                            |                                                                                                                                                                                                                                                                                         |                                                                                                                                                                           |
| 20 |                            |                                                                                                                                                                                                                                                                                         |                                                                                                                                                                           |
| 21 |                            |                                                                                                                                                                                                                                                                                         |                                                                                                                                                                           |
| 22 |                            |                                                                                                                                                                                                                                                                                         |                                                                                                                                                                           |
| 23 |                            |                                                                                                                                                                                                                                                                                         |                                                                                                                                                                           |
| 24 |                            |                                                                                                                                                                                                                                                                                         |                                                                                                                                                                           |
| 25 |                            |                                                                                                                                                                                                                                                                                         |                                                                                                                                                                           |
| 26 | Bias                       | <a href="#">#9</a> Describe any efforts to address potential sources of bias                                                                                                                                                                                                            | 6-7, study utilized standard guidelines to formulate exclusion and inclusion criteria for every group to limit the selection bias.                                        |
| 27 |                            |                                                                                                                                                                                                                                                                                         |                                                                                                                                                                           |
| 28 |                            |                                                                                                                                                                                                                                                                                         |                                                                                                                                                                           |
| 29 |                            |                                                                                                                                                                                                                                                                                         |                                                                                                                                                                           |
| 30 |                            |                                                                                                                                                                                                                                                                                         |                                                                                                                                                                           |
| 31 |                            |                                                                                                                                                                                                                                                                                         |                                                                                                                                                                           |
| 32 |                            |                                                                                                                                                                                                                                                                                         |                                                                                                                                                                           |
| 33 |                            |                                                                                                                                                                                                                                                                                         |                                                                                                                                                                           |
| 34 | Study size                 | <a href="#">#10</a> Explain how the study size was arrived at                                                                                                                                                                                                                           | n/a... The size of study was decided after considering previous studies on neutrophil subsets eg Juss et al, on neutrophil subset in acute respiratory distress syndrome. |
| 35 |                            |                                                                                                                                                                                                                                                                                         |                                                                                                                                                                           |
| 36 |                            |                                                                                                                                                                                                                                                                                         |                                                                                                                                                                           |
| 37 |                            |                                                                                                                                                                                                                                                                                         |                                                                                                                                                                           |
| 38 |                            |                                                                                                                                                                                                                                                                                         |                                                                                                                                                                           |
| 39 |                            |                                                                                                                                                                                                                                                                                         |                                                                                                                                                                           |
| 40 |                            |                                                                                                                                                                                                                                                                                         |                                                                                                                                                                           |
| 41 |                            |                                                                                                                                                                                                                                                                                         |                                                                                                                                                                           |
| 42 |                            |                                                                                                                                                                                                                                                                                         |                                                                                                                                                                           |
| 43 |                            |                                                                                                                                                                                                                                                                                         |                                                                                                                                                                           |
| 44 | Quantitative variables     | <a href="#">#11</a> Explain how quantitative variables were handled in the analyses. If applicable, describe which groupings were chosen, and why                                                                                                                                       | 8                                                                                                                                                                         |
| 45 |                            |                                                                                                                                                                                                                                                                                         |                                                                                                                                                                           |
| 46 |                            |                                                                                                                                                                                                                                                                                         |                                                                                                                                                                           |
| 47 |                            |                                                                                                                                                                                                                                                                                         |                                                                                                                                                                           |
| 48 |                            |                                                                                                                                                                                                                                                                                         |                                                                                                                                                                           |
| 49 |                            |                                                                                                                                                                                                                                                                                         |                                                                                                                                                                           |
| 50 |                            |                                                                                                                                                                                                                                                                                         |                                                                                                                                                                           |
| 51 | Statistical methods        | <a href="#">#12a</a> Describe all statistical methods, including those used to control for confounding                                                                                                                                                                                  | 8                                                                                                                                                                         |
| 52 |                            |                                                                                                                                                                                                                                                                                         |                                                                                                                                                                           |
| 53 |                            |                                                                                                                                                                                                                                                                                         |                                                                                                                                                                           |
| 54 |                            |                                                                                                                                                                                                                                                                                         |                                                                                                                                                                           |
| 55 |                            | <a href="#">#12b</a> Describe any methods used to examine subgroups and interactions                                                                                                                                                                                                    | n/a...we examined COPD subgroups (Eosinophilic and Non-Eosinophilic) based on                                                                                             |
| 56 |                            |                                                                                                                                                                                                                                                                                         |                                                                                                                                                                           |
| 57 |                            |                                                                                                                                                                                                                                                                                         |                                                                                                                                                                           |
| 58 |                            |                                                                                                                                                                                                                                                                                         |                                                                                                                                                                           |
| 59 |                            |                                                                                                                                                                                                                                                                                         |                                                                                                                                                                           |
| 60 |                            |                                                                                                                                                                                                                                                                                         |                                                                                                                                                                           |

|    |                  |                      |                                               |
|----|------------------|----------------------|-----------------------------------------------|
| 1  |                  |                      | pre-defined cut off values on                 |
| 2  |                  |                      | page 12-14.                                   |
| 3  |                  |                      |                                               |
| 4  |                  | <a href="#">#12c</a> | Explain how missing data were addressed       |
| 5  |                  |                      | Missing data were excluded                    |
| 6  |                  |                      | from analysis.                                |
| 7  |                  |                      |                                               |
| 8  |                  | <a href="#">#12d</a> | If applicable, describe analytical methods    |
| 9  |                  |                      | n/a. The study did not use any                |
| 10 |                  |                      | analytical method.                            |
| 11 |                  |                      |                                               |
| 12 |                  | <a href="#">#12e</a> | Describe any sensitivity analyses             |
| 13 |                  |                      | n/a. No sensitive analysis                    |
| 14 |                  |                      | were performed in this study.                 |
| 15 | Participants     | <a href="#">#13a</a> | Report numbers of individuals at each         |
| 16 |                  |                      | stage of study—eg numbers potentially         |
| 17 |                  |                      | eligible, examined for eligibility, confirmed |
| 18 |                  |                      | eligible, included in the study, completing   |
| 19 |                  |                      | follow-up, and analysed. Give information     |
| 20 |                  |                      | separately for for exposed and unexposed      |
| 21 |                  |                      | groups if applicable.                         |
| 22 |                  |                      |                                               |
| 23 |                  |                      |                                               |
| 24 |                  |                      |                                               |
| 25 |                  |                      |                                               |
| 26 |                  |                      |                                               |
| 27 |                  | <a href="#">#13b</a> | Give reasons for non-participation at each    |
| 28 |                  |                      | stage                                         |
| 29 |                  |                      | n/a.... No non-participation to               |
| 30 |                  |                      | report for this study.                        |
| 31 |                  | <a href="#">#13c</a> | Consider use of a flow diagram                |
| 32 |                  |                      | n/a                                           |
| 33 | Descriptive data | <a href="#">#14a</a> | Give characteristics of study participants    |
| 34 |                  |                      | (eg demographic, clinical, social) and        |
| 35 |                  |                      | information on exposures and potential        |
| 36 |                  |                      | confounders. Give information separately      |
| 37 |                  |                      | for exposed and unexposed groups if           |
| 38 |                  |                      | applicable.                                   |
| 39 |                  |                      |                                               |
| 40 |                  |                      |                                               |
| 41 |                  |                      |                                               |
| 42 |                  |                      |                                               |
| 43 |                  | <a href="#">#14b</a> | Indicate number of participants with          |
| 44 |                  |                      | missing data for each variable of interest    |
| 45 |                  |                      | 10 (Table 1...spirometry data                 |
| 46 |                  |                      | for only 19 healthy                           |
| 47 |                  |                      | participants out of 20).                      |
| 48 | Outcome data     | <a href="#">#15</a>  | Report numbers of outcome events or           |
| 49 |                  |                      | summary measures. Give information            |
| 50 |                  |                      | separately for exposed and unexposed          |
| 51 |                  |                      | groups if applicable.                         |
| 52 |                  |                      |                                               |
| 53 |                  |                      |                                               |
| 54 |                  |                      |                                               |
| 55 | Main results     | <a href="#">#16a</a> | Give unadjusted estimates and, if             |
| 56 |                  |                      | applicable, confounder-adjusted estimates     |
| 57 |                  |                      | and their precision (eg, 95% confidence       |
| 58 |                  |                      |                                               |
| 59 |                  |                      | 7-14                                          |
| 60 |                  |                      |                                               |



interval). Make clear which confounders were adjusted for and why they were included

|    |                  |                      |                                                                             |
|----|------------------|----------------------|-----------------------------------------------------------------------------|
| 1  |                  |                      |                                                                             |
| 2  |                  |                      |                                                                             |
| 3  |                  |                      |                                                                             |
| 4  |                  |                      |                                                                             |
| 5  |                  |                      |                                                                             |
| 6  |                  | <a href="#">#16b</a> | Report category boundaries when 14                                          |
| 7  |                  |                      | continuous variables were categorized                                       |
| 8  |                  |                      |                                                                             |
| 9  |                  | <a href="#">#16c</a> | If relevant, consider translating estimates n/a....was not relevant in this |
| 10 |                  |                      | of relative risk into absolute risk for a study.                            |
| 11 |                  |                      | meaningful time period                                                      |
| 12 |                  |                      |                                                                             |
| 13 |                  |                      |                                                                             |
| 14 | Other analyses   | <a href="#">#17</a>  | Report other analyses done—e.g., 12-14                                      |
| 15 |                  |                      | analyses of subgroups and interactions,                                     |
| 16 |                  |                      | and sensitivity analyses                                                    |
| 17 |                  |                      |                                                                             |
| 18 |                  |                      |                                                                             |
| 19 |                  |                      |                                                                             |
| 20 | Key results      | <a href="#">#18</a>  | Summarise key results with reference to 15                                  |
| 21 |                  |                      | study objectives                                                            |
| 22 |                  |                      |                                                                             |
| 23 |                  |                      |                                                                             |
| 24 | Limitations      | <a href="#">#19</a>  | Discuss limitations of the study, taking into 17                            |
| 25 |                  |                      | account sources of potential bias or                                        |
| 26 |                  |                      | imprecision. Discuss both direction and                                     |
| 27 |                  |                      | magnitude of any potential bias.                                            |
| 28 |                  |                      |                                                                             |
| 29 |                  |                      |                                                                             |
| 30 | Interpretation   | <a href="#">#20</a>  | Give a cautious overall interpretation 15-17                                |
| 31 |                  |                      | considering objectives, limitations,                                        |
| 32 |                  |                      | multiplicity of analyses, results from similar                              |
| 33 |                  |                      | studies, and other relevant evidence.                                       |
| 34 |                  |                      |                                                                             |
| 35 |                  |                      |                                                                             |
| 36 |                  |                      |                                                                             |
| 37 | Generalisability | <a href="#">#21</a>  | Discuss the generalisability (external n/a                                  |
| 38 |                  |                      | validity) of the study results                                              |
| 39 |                  |                      |                                                                             |
| 40 |                  |                      |                                                                             |
| 41 | Funding          | <a href="#">#22</a>  | Give the source of funding and the role of 2                                |
| 42 |                  |                      | the funders for the present study and, if                                   |
| 43 |                  |                      | applicable, for the original study on which                                 |
| 44 |                  |                      | the present article is based                                                |
| 45 |                  |                      |                                                                             |
| 46 |                  |                      |                                                                             |
| 47 |                  |                      |                                                                             |

The STROBE checklist is distributed under the terms of the Creative Commons Attribution License CC-BY. This checklist can be completed online using <https://www.goodreports.org/>, a tool made by the [EQUATOR Network](#) in collaboration with [Penelope.ai](#)



# BMJ Open

## Hypersegmented airway neutrophils and its association with reduced lung function in adults with obstructive airway disease: An observational study.

|                                 |                                                                                                                                                                                                                                                                                                                                                                                                                                                                                                                                                         |
|---------------------------------|---------------------------------------------------------------------------------------------------------------------------------------------------------------------------------------------------------------------------------------------------------------------------------------------------------------------------------------------------------------------------------------------------------------------------------------------------------------------------------------------------------------------------------------------------------|
| Journal:                        | <i>BMJ Open</i>                                                                                                                                                                                                                                                                                                                                                                                                                                                                                                                                         |
| Manuscript ID                   | bmjopen-2018-024330.R1                                                                                                                                                                                                                                                                                                                                                                                                                                                                                                                                  |
| Article Type:                   | Research                                                                                                                                                                                                                                                                                                                                                                                                                                                                                                                                                |
| Date Submitted by the Author:   | 19-Oct-2018                                                                                                                                                                                                                                                                                                                                                                                                                                                                                                                                             |
| Complete List of Authors:       | Lokwani, Ravi; University of Newcastle School of Medicine and Public Health, Priority Research Centre for Healthy Lungs, Faculty of Health and Medicine,<br>Wark, Peter; Centre for Asthma and Respiratory Disease University of Newcastle, Respiratory and Sleep Medicine<br>Baines, Katherine; University of Newcastle, Respiratory and Sleep Medicine<br>Barker, Daniel; University of Newcastle School of Medicine and Public Health, Faculty of Health and Medicine<br>Simpson, Jodie; The University of Newcastle, Respiratory and Sleep Medicine |
| <b>Primary Subject Heading</b>: | Respiratory medicine                                                                                                                                                                                                                                                                                                                                                                                                                                                                                                                                    |
| Secondary Subject Heading:      | Immunology (including allergy)                                                                                                                                                                                                                                                                                                                                                                                                                                                                                                                          |
| Keywords:                       | Immunology < THORACIC MEDICINE, Bronchoscopy < THORACIC MEDICINE, Chronic airways disease < THORACIC MEDICINE                                                                                                                                                                                                                                                                                                                                                                                                                                           |
|                                 |                                                                                                                                                                                                                                                                                                                                                                                                                                                                                                                                                         |

SCHOLARONE™  
Manuscripts

1  
2  
3 **Hypersegmented airway neutrophils and its association with reduced lung function in adults**  
4  
5 **with obstructive airway disease: An observational study.**  
6  
7

8 **Authors:** Ravi Lokwani <sup>1, 3</sup>, Peter AB Wark <sup>1-3</sup>, Katherine J Baines <sup>1, 3</sup>, Daniel Barker <sup>3</sup>, Jodie L  
9  
10 Simpson <sup>1-3</sup>  
11  
12

13 **Affiliations:**  
14  
15

16  
17 **1:** Priority Research Centre for Healthy Lungs, Faculty of Health and Medicine, Hunter Medical  
18  
19 Research Institute, University of Newcastle, Callaghan NSW 2308, Australia.  
20  
21

22 **2:** Department of Respiratory and Sleep Medicine, John Hunter Hospital, New Lambton Heights,  
23  
24 NSW, 2305, Australia.  
25  
26

27 **3:** School of Medicine and Public Health, Faculty of Health and Medicine, University of Newcastle,  
28  
29 Callaghan NSW 2308, Australia.  
30  
31

32 **Corresponding Author:**  
33  
34

35 Professor Jodie L Simpson  
36  
37

38 Level 2, East Wing, Hunter Medical Research Institute,  
39  
40

41 Locked Bag 1000, New Lambton, NSW 2305, Australia.  
42  
43

44 Email: jodie.simpson@newcastle.edu.au  
45  
46

47 Phone: 61 2 40420148 Fax: 61 2 49855850  
48  
49

50 **Key words:** Immunology, Chronic airways disease, Bronchoscopy.  
51  
52  
53  
54

55 **Word**

**count:**

3211

56  
57  
58 1  
59  
60

1  
2  
3 **1 ABSTRACT:**  
4  
5

6 **2 Objectives:** The significance of neutrophilic inflammation in obstructive airway disease remains  
7  
8 **3** controversial. Recent studies have demonstrated presence of an active neutrophil population in systemic  
9  
10 **4** circulation, featuring hypersegmented morphology, with high oxidative burst and functional plasticity in  
11  
12 **5** inflammatory conditions. The aim of this study was to characterize neutrophil subsets in bronchial lavage  
13  
14 **6** (BL) of obstructive airway disease participants (asthma, COPD and bronchiectasis) and healthy controls on  
15  
16 **7** the basis of nuclear morphology and to assess association between neutrophil subsets and clinical parameters  
17  
18 **8** of obstructive airway disease participants.  
19

20  
21 **9 Design:** An observational study.  
22  
23

24 **10 Setting:** John Hunter Hospital and Hunter Medical Research Institute, Australia.  
25  
26

27 **11 Participants:** Seventy-eight adults with obstructive airway disease, stable asthma (n=39) COPD (n=20), and  
28  
29 **12** bronchiectasis (n=19) and 20 healthy controls.  
30  
31

32 **13 Material and Methods:** Cytospins were prepared and neutrophil subtypes were classified based on the cells  
33  
34 **14** nuclear morphology into hypersegmented (>4 lobes), normal (2-4 lobes) and banded (1 lobe) neutrophils and  
35  
36 **15** enumerated.  
37  
38

39 **16 Results:** Neutrophils from each subset were identified in all participants. Numbers of hypersegmented  
40  
41 **17** neutrophils were elevated in participants with airway disease compared with healthy controls ( $p < 0.001$ ). Both  
42  
43 **18** the number and proportion of hypersegmented neutrophils were highest in COPD participants (median (q1-  
44  
45 **19** q3) of 1073.6 (258.8-2742)  $\times 10^2/\text{mL}$  and 24.5 (14.0-46.5) %, respectively). An increased proportion of  
46  
47 **20** hypersegmented neutrophils in airway disease participants was significantly associated with lower  
48  
49 **21** FEV<sub>1</sub>/FVC % (spearman's Rho= -0.322,  $p = 0.004$ ).  
50  
51

1  
2  
3 22 **Conclusion:** Neutrophil heterogeneity is common in bronchial lavage and is associated with more severe  
4  
5 23 airflow obstruction in adults with airways disease. Further work is required to elucidate the functional  
6  
7 24 consequences of hypersegmented neutrophils in the pathogenesis of disease.  
8  
9

10 25 **Word count:** 260  
11  
12

## 13 26 **STRENGTHS AND LIMITATION OF STUDY**

14  
15

- 16 27 ➤ This is the first observational study to characterize three morphologically different subset of  
17  
18 28 neutrophils in the bronchial lavage of adults with obstructive airway disease and healthy  
19  
20 29 controls.  
21  
22 30 ➤ The study investigated clinical association of neutrophils subset with airway obstruction.  
23  
24 31 ➤ The cross-sectional nature of study is a limitation in properly understanding the reason  
25  
26 32 behind neutrophil heterogeneity in airways.  
27  
28  
29  
30  
31  
32  
33  
34  
35  
36  
37  
38  
39  
40  
41  
42  
43  
44  
45  
46  
47  
48  
49  
50  
51  
52  
53  
54  
55  
56  
57  
58  
59  
60

1  
2  
3 42  
4  
5  
6 43  
7  
8  
9 44  
10  
11  
12 45  
13  
14  
15 46  
16  
1718 47 **INTRODUCTION:**  
19  
20

21 48 Neutrophils are phagocytic innate immune cells which patrol blood vessels and become activated in  
22  
23 49 response to inflammatory triggers<sup>1</sup>. Activation results in neutrophil migration to the site of infection,  
24  
25 50 where pathogens can be eliminated by phagocytosis or NETosis<sup>2</sup>. Similarly, infection or injury can  
26  
27 51 result in the initiation of an innate immune response following the engagement of PAMPs (pathogen  
28  
29 52 associated molecular patterns) and DAMPs (damage associated molecular patterns) with pattern  
30  
31 53 recognition receptors of airways. This facilitates the release of chemotactic stimuli such as CXCL8,  
32  
33 54 IL-1 $\beta$ , and TNF- $\alpha$ , resulting in neutrophil recruitment to the airways<sup>3</sup>, which is important for the  
34  
35 55 resolution of infection and inflammation<sup>4</sup>. In contrast, a disproportionate or dysregulated influx or  
36  
37 56 efflux of neutrophils can result in persistent neutrophilic airway inflammation and tissue damage<sup>5</sup>.  
38  
39  
40  
41  
42 57 Inflammation characterised by airway neutrophilia is reported in many cases of chronic obstructive  
43  
44 58 airway disease<sup>6</sup>. This includes 20-30% cases of asthma<sup>7</sup>, more than 40% of cases of chronic  
45  
46 59 obstructive pulmonary disease (COPD)<sup>8 9</sup>, and 70% of cases of non-cystic fibrosis (CF)  
47  
48 60 bronchiectasis<sup>10</sup>. Current therapeutic and management strategies for asthma and COPD focus on  
49  
50 61 bronchodilation to overcome airflow limitation, or inhaled corticosteroids based therapies along  
51  
52 62 with modification of eosinophilic airway inflammation using corticosteroids<sup>11 12</sup>. In non-CF  
53  
54  
55  
56  
57

1  
2  
3 63 bronchiectasis treatment relies on antibiotics to control the infective nature of the disease<sup>13</sup>. While  
4  
5 64 inhaled corticosteroids are highly effective in modifying eosinophilic inflammation in the airways<sup>14</sup>,  
6  
7  
8 65 there are no treatments that have been shown to influence neutrophil mediated inflammation. One  
9  
10 66 of the primary reasons behind this is our lack of understanding about neutrophils <sup>15 16</sup>.

11  
12  
13 67 Despite the fact that previous studies have shown an association between elevated neutrophils in  
14  
15 68 airways with lower FEV<sub>1</sub> in obstructive airway disease <sup>17</sup>, little is known about variations within the  
16  
17  
18 69 population of neutrophils in the airways. Recent studies have identified heterogeneity within  
19  
20 70 circulating neutrophils. Pillay, *et al* <sup>18</sup> identified three subsets of neutrophils (normal, banded and  
21  
22 71 hypersegmented) in the circulation following an inflammatory challenge. Each subtype had a  
23  
24  
25 72 distinct nuclear morphology and pattern of surface adhesion molecule expression, with  
26  
27 73 hypersegmented neutrophils showing increased capacity for oxidative burst along with a unique  
28  
29 74 ability to suppress T lymphocytes. The same morphologically distinct subsets have been identified  
30  
31 75 in both bronchial lavage (BL) and blood from patients with acute respiratory distress syndrome <sup>19</sup>  
32  
33  
34 76 and in infants with severe viral respiratory infection <sup>20</sup>.

35  
36  
37 77 The presence and characteristics of neutrophil subsets in obstructive airways disease is unknown. In  
38  
39 78 this study, we have characterised neutrophil subsets in BL fluid from adults with asthma, COPD,  
40  
41 79 non-CF bronchiectasis and healthy controls. We hypothesised that participants with obstructive  
42  
43  
44 80 airway disease would have increased numbers of hypersegmented neutrophils and that the presence  
45  
46 81 of hypersegmented neutrophils would be associated with clinical disease severity.

47  
48  
49 82

50  
51  
52 83 **MATERIAL AND METHODS:**

1  
2  
3 84 **Patient and Public Involvement (PPI):** Patients and or the public were not involved in the  
4  
5 85 development of the research question and outcome measures of this study. The research  
6  
7 86 question was developed by authors (JLS and PABW). Patients were recruited if they were  
8  
9 87 undergoing a bronchoscopy as explained in "participants" section. The results will be disseminated  
10  
11 88 through publication and presentation at local, national and international research meetings.  
12  
13  
14

15 89 **Participants:** Adults who were undergoing bronchoscopy either for medical purposes or were  
16  
17 90 undergoing a surgical procedure that involved endotracheal intubation and had spirometry results,  
18  
19 91 were recruited for this study from the outpatient clinic of John Hunter Hospital. The study was  
20  
21 92 approved by Hunter New England Human Research Ethics Committee (Reference No  
22  
23 93 05/08/10/3.09) and all participants provided written informed consent.  
24  
25  
26

27 94 **Study design:** A cross sectional study was conducted in which BL samples were obtained after the  
28  
29 95 assessment of clinical history including respiratory symptoms, smoking status and medication.  
30  
31 96 Spirometry and bronchoscopy were performed as outlined below.  
32  
33  
34

35 97 **Study group:** Adults (>18 years) with no history of a clinical chest or upper respiratory tract  
36  
37 98 infection in the previous 6 weeks were studied. Healthy non-smokers (n=20) had normal lung  
38  
39 99 function assessed by spirometry, and had no previous history of respiratory disease. Adults with  
40  
41 100 asthma (n=40) had a physician's diagnosis of asthma with objective evidence of airflow variability  
42  
43 101 or bronchial hyperactivity on provocation challenge. Bronchiectasis (n=20) was defined as evidence  
44  
45 102 of a permanent dilation of airway segment on high resolution computed tomography scan while  
46  
47 103 those with COPD (n=20) had evidence of respiratory symptoms in combination with a post  
48  
49 104 bronchodilator FEV<sub>1</sub> of less than 80% of predicted value and/or a post bronchodilator FEV<sub>1</sub>/FVC  
50  
51 105 less than 70%. Current smokers were excluded. Since this was an exploratory study in a completely  
52  
53  
54  
55  
56  
57

1  
2  
3 106 new setting, the number of participants in each group were decided on the basis of previous  
4  
5 107 exploratory studies in this area<sup>18 19 21</sup>.

7  
8 108 **Spirometry:** Spirometry was performed (Easy One Spirometer, ndd Medical Technologies,  
9  
10 109 Massachusetts, USA) at John Hunter Hospital. Variable obstruction defined as a post bronchodilator  
11  
12 110 change in FEV<sub>1</sub> of 12% or 200mL after 400 mcg of salbutamol and the bronchial hyper-  
13  
14 111 responsiveness defined as at least 15% decline in FEV<sub>1</sub> after inducing bronchial provocation with  
15  
16 112 4.5% saline solution.

17  
18  
19  
20 113 **Bronchoscopy:** Flexible bronchoscopy was performed at John Hunter Hospital bronchial wash was  
21  
22 114 taken by wedging the bronchoscope into the right middle lobe and washing with 40 mL of sterile  
23  
24 115 saline solution. A fraction of BL was sent for microbial detection while the rest was processed as  
25  
26 116 described below.

27  
28  
29  
30 117 **BL processing:** BL was filtered and total cell count (TCC) and viability was assessed by using  
31  
32 118 trypan blue exclusion method, within one hour of collection at Hunter Medical Research Institute.  
33  
34 119 The BL was centrifuged and the cell pellet was resuspended in PBS to the concentration of  $1 \times 10^6$ /mL  
35  
36 120 and cellular cytopins were prepared. The cytopins were stained with May-Grünwald Giemsa  
37  
38 121 (Beckman Coulter, Brea, CA, USA) and a differential cell count of 400 non squamous cells was  
39  
40 122 performed.

41  
42  
43  
44 123 **Neutrophil subtype assessment:** Stained cytopins were examined under oil immersion and 100  
45  
46 124 neutrophils were enumerated into banded, normal and hypersegmented neutrophils. Banded  
47  
48 125 neutrophils had a single banded lobe without any visible division; normal neutrophils had two to  
49  
50 126 four lobes with every lobe having a properly visible outer boundary; and hypersegmented  
51  
52  
53  
54  
55  
56  
57



1  
2  
3 127 neutrophils had more than four lobes with every lobe having a properly visible outer boundary as  
4  
5 128 shown in Figure 1.  
6  
7

8 129 **Statistical Analysis:** Data were analysed using Stata software version 11 (StataCorp, College  
9  
10 130 Station, TX, USA). Results are reported as mean (SD) or median (interquartile range), unless  
11  
12  
13 131 otherwise stated. Continuous measures were analysed using the two-sample Wilcoxon's rank sum  
14  
15 132 test or t-test and Kruskal-Wallis test or one way analysis of variance (ANOVA) as appropriate.  
16  
17  
18 133 Categorical data were analysed using Fisher's exact test. Spearman correlation coefficients were  
19  
20 134 calculated for the association between neutrophil subsets and clinical characteristics.  
21  
22  
23 135  
24  
25  
26 136  
27  
28  
29 137  
30  
31

## 32 138 **RESULTS**

### 33 34 35 139 **Clinical characteristics**

36  
37  
38 140 Participants with COPD were more likely to be ex-smoking males with more severe airflow  
39  
40 141 obstruction (Table 1). Fewer participants with COPD were prescribed ICS compared with the asthma  
41  
42 142 group, however, the mean daily dose of ICS was significantly higher in COPD participants. The  
43  
44  
45 143 number of participants with severe asthma were higher than the number with severe COPD (Table  
46  
47 144 1) according to GINA<sup>22</sup> and GOLD<sup>23</sup> severity classification, respectively. Bronchiectasis  
48  
49 145 participants were generally of mild severity according to their bronchiectasis severity index<sup>24</sup> (Table  
50  
51 146 1). The causes of bronchiectasis is mainly idiopathic and post-infection (Table S1, supplementary  
52  
53  
54 147 data).  
55  
56  
57

### 148 **Inflammatory cell counts**

149 BL inflammatory cell counts for the participants are detailed in Table 2. Participants with  
150 bronchiectasis and COPD had an increased total cell count (TCC) (Table 2). The proportion and  
151 number of neutrophils was significantly higher in the bronchiectasis and COPD group compared  
152 with healthy controls, while the proportion of neutrophils in asthma were significantly lower in  
153 comparison with COPD. The asthma group also had significantly lower number of neutrophils in  
154 comparison with bronchiectasis and COPD. The proportion of eosinophils was significantly higher  
155 in COPD and asthma compared with healthy controls, while the number of eosinophils was  
156 significantly higher in all three obstructive airways diseases compared with healthy controls.

### 158 **Neutrophil subsets**

159 All three neutrophil subsets were identified in the BL of all participants. The numbers of normal  
160 neutrophils were significantly higher in bronchiectasis and COPD group in comparison to healthy  
161 and asthma (Figure 2A). Numbers of banded neutrophils were highest in those participants with  
162 bronchiectasis compared with both healthy and asthma groups, while in COPD banded neutrophils  
163 numbers were higher in comparison with healthy participants only (Figure 2B). Hypersegmented  
164 neutrophil numbers were significantly increased in all the obstructive airway disease groups  
165 compared with healthy controls and increased in participants with COPD compared with asthma and  
166 bronchiectasis (Figure 2C).

167 When considering the relative distribution of neutrophil subtypes by proportion (shown in Figure 2  
168 D-F), participants with COPD had a significantly reduced proportion of normal and banded  
169 neutrophils and subsequently a significantly increased proportion of hypersegmented neutrophils.

Table 1: Clinical characteristics of participants with bronchiectasis, asthma, COPD, and healthy controls.

|                                              | Bronchiectasis                | COPD                      | Asthma                          | Healthy                              | p value |
|----------------------------------------------|-------------------------------|---------------------------|---------------------------------|--------------------------------------|---------|
| n                                            | 19                            | 20                        | 39                              | 20                                   |         |
| Age                                          | 67.8 (7.1)                    | 68.8 (10.2)               | 64.8 (7.3)                      | 61.3 (9.7)                           | 0.024   |
| Males, n (%)                                 | 7 (36.8)                      | 14 (70.0)                 | 18 (46.2)                       | 9 (45.0)                             | 0.184   |
| Ex-smoker, n (%)                             | 0 (0.0)                       | 20 (100.0) <sup>^ φ</sup> | 15 (38.5) <sup>φ #</sup>        | 2 (10.0)                             | <0.001  |
| Smoking (pack years)                         | --                            | 35.0 (20.0-55.0)          | 10.0 (4.0-30.0) <sup>#</sup>    | (5.0,5.0)                            | 0.007   |
| FEV <sub>1</sub> % predicted                 | 91.9 (18.3) <sup>#</sup>      | 57.4 (16.9) <sup>^</sup>  | 72.3 (20.1) <sup>^ φ</sup>      | 98.6 (12.1), n=19                    | <0.001  |
| FEV <sub>1</sub> /FVC (%)                    | 73.0 (67.0-78.0) <sup>#</sup> | 59.5 (39.0- 65.0)         | 66.0 (59.0-72.0) <sup>^ #</sup> | 75.0 (72.0-80.0) <sup>#</sup> , n=19 | <0.001  |
| Taking ICS n (%)                             | 0 (0.0)                       | 8 (40.0)                  | 37 (94.9) <sup>#</sup>          | 0 (0.0)                              | <0.001  |
| BDP equivalent ICS dose μg day <sup>-1</sup> | --                            | 1700.00 (555.49)          | 978.37 (398.70) <sup>#</sup>    | --                                   | <0.001  |
| Bacterial pathogen, n (%)                    | 8 (42.1) <sup>^</sup>         | 8 (40.0) <sup>^</sup>     | 12 (30.8) <sup>^</sup>          | 0 (0)                                | 0.003   |
| Bronchiectasis severity index                | 4 (2.0-7.0), n=18             | --                        | --                              | --                                   | --      |
| GINA stages of asthma severity, n (%)        |                               |                           |                                 |                                      |         |
| Intermittent                                 |                               |                           | 1 (2.6)                         |                                      |         |
| Mild persistent                              |                               |                           | 6 (15.8)                        |                                      |         |
| Moderate persistent                          |                               |                           | 9 (23.7)                        |                                      |         |
| Severe persistent                            |                               |                           | 22 (56.4)                       |                                      |         |

1  
2  
3  
4  
5  
6  
7  
8  
9  
10  
11  
12  
13  
14  
15  
16  
17  
18  
19  
20  
21  
22  
23  
24  
25  
26  
27  
28  
29  
30  
31  
32  
33  
34  
35  
36  
37  
38  
39  
40  
41  
42  
43  
44  
45  
46  
47

|                                     |  |           |  |  |
|-------------------------------------|--|-----------|--|--|
| GOLD stages of COPD severity, n (%) |  |           |  |  |
| GOLD stage 1 (mild)                 |  | 2 (10.0)  |  |  |
| GOLD stage 2 (moderate)             |  | 11 (55.0) |  |  |
| GOLD stage 3 (severe)               |  | 6 (30.0)  |  |  |
| GOLD stage 4 (very severe)          |  | 1 (5.0)   |  |  |

Data are presented as mean ± SD or median (interquartile range; q1- q3) unless otherwise stated. FEV<sub>1</sub>: force expiratory volume in 1s; FVC: Forced vital capacity; ICS: Inhaled corticosteroids; BDP equivalent: ICS dose is calculated as beclomethasone dipropionate equivalent, where 1µg of beclomethasone = 1µg budesonide = 0.5µg fluticasone. ^p<0.0125 compared with healthy controls, φ p<0.0125 compared with bronchiectasis and # p<0.0125 compared with COPD.

Table 2: Inflammatory cell count of participants with bronchiectasis, asthma, COPD, and healthy controls.

|                                                | Bronchiectasis                   | COPD                              | Asthma                           | Healthy             | p value* |
|------------------------------------------------|----------------------------------|-----------------------------------|----------------------------------|---------------------|----------|
| Total cells x 10 <sup>6</sup> / mL             | 0.62 (0.19-1.74) <sup>^</sup>    | 0.83 (0.16-1.88) <sup>^</sup>     | 0.16 (0.09-0.34) <sup>#φ</sup>   | 0.08 (0.05- 0.21)   | <0.001   |
| Viability, %                                   | 82.26 (75.00-91.67) <sup>^</sup> | 87.75 (73.60-92.95) <sup>^</sup>  | 77.78 (62.30-88.00)              | 72.22 (50.00-75.00) | 0.005    |
| Neutrophil, %                                  | 67.50 (41.00-84.25) <sup>^</sup> | 77.25 (73.00-85.13) <sup>^</sup>  | 58.00 (24.50-72.50) <sup>#</sup> | 28.25 (14.75-63.50) | <0.001   |
| Neutrophils x 10 <sup>4</sup> cells/mL         | 43.20 (5.21-164.43) <sup>^</sup> | 60.35 (13.31-149.70) <sup>^</sup> | 8.24 (3.12-25.01) <sup>φ#</sup>  | 3.18 (1.51-5.03)    | <0.001   |
| Eosinophils, %                                 | 1.00 (0.50-6.50)                 | 3.75 (1.13-8.88) <sup>^</sup>     | 2.25 (1.00-11.75) <sup>^</sup>   | 1.00 (0.75-1.25)    | 0.016    |
| Eosinophils x 10 <sup>4</sup> cells/mL         | 0.75 (0.40-2.76) <sup>^</sup>    | 1.89 (1.03-4.03) <sup>^</sup>     | 0.63 (0.14-3.07) <sup>^</sup>    | 0.09 (0.05-0.23)    | <0.001   |
| Macrophages,%                                  | 18.75 (11.00-34.75)              | 15.50 (8.50-20.03) <sup>^</sup>   | 25.00 (9.25-39.25)               | 29.25 (17.00-63.12) | 0.025    |
| Macrophages x 10 <sup>4</sup> cells/mL         | 12.40 (5.94-24.42) <sup>^</sup>  | 9.66 (2.91-18.24)                 | 4.24 (2.00-7.77) <sup>φ</sup>    | 2.10 (1.42-6.43)    | 0.002    |
| Lymphocytes, %                                 | 0.75 (0.00-1.50)                 | 0.38 (0.00-1.25)                  | 0.50 (0.00-1.50)                 | 1.5 (0.25-5.13)     | 0.058    |
| Lymphocyte x 10 <sup>4</sup> cells/mL          | 0.30 (0.00-1.02)                 | 0.18 (0.00-0.89)                  | 0.09 (0.00-0.37)                 | 0.18 (0.05-0.42)    | 0.459    |
| Columnar epithelial cells, %                   | 1.75 (0.75-10.50)                | 0.25 (0.00-2.50) <sup>^</sup>     | 4.50 (1.50-10.75) <sup>#</sup>   | 9.50 (4.88-23.63)   | <0.001   |
| Columnar epithelial x 10 <sup>4</sup> cells/mL | 1.99 (0.48-2.67) <sup>#</sup>    | 0.28 (0.00-0.59) <sup>^</sup>     | 1.00 (0.35-1.98) <sup>#</sup>    | 0.88 (0.38-2.38)    | <0.001   |

1  
2  
3  
4  
5  
6  
7  
8  
9  
10  
11  
12  
13  
14  
15  
16  
17  
18  
19  
20  
21  
22  
23  
24  
25  
26  
27  
28  
29  
30  
31  
32  
33  
34  
35  
36  
37  
38  
39  
40  
41  
42  
43  
44  
45  
46  
47

For peer review only

Data are presented as median (interquartile range; q1- q3) unless otherwise stated.

\* Kruskal-Wallis test, ^ p<0.0125 compared with healthy, φ p<0.0125 compared with bronchiectasis, and # p<0.0125 compared with COPD.

## 170 Association of neutrophil subsets with clinical characteristics in obstructive airway disease

171 There was a significant negative correlation between the proportion of hypersegmented neutrophils  
172 with both FEV<sub>1</sub>% predicted (spearman's Rho -0.301, p=0.007) and FEV<sub>1</sub>/FVC% (Rho= -0.322, p=0.004,  
173 Figure 3) in participants with obstructive airway disease (n=78). While the same was not observed  
174 for banded neutrophils [FEV<sub>1</sub>% predicted (Rho= 0.181, p=0.114), FEV<sub>1</sub>/FVC% (Rho= 0.213,  
175 p=0.061)] and normal neutrophils [FEV<sub>1</sub>% predicted (Rho= 0.189, p=0.097), FEV<sub>1</sub>/FVC% (Rho=  
176 0.213, p=0.062)]. There was no association between total hypersegmented neutrophils (x 10<sup>2</sup> cells/mL)  
177 with both FEV<sub>1</sub>% predicted (Rho= -0.152, p=0.185) and FEV<sub>1</sub>/FVC% (Rho= -0.173, p=0.131).  
178 Similarly, no association was observed between total neutrophil proportion and number with either  
179 FEV<sub>1</sub>% predicted [Rho= -0.143, p=0.212 and Rho=-0.036, p=0.758, respectively] or FEV<sub>1</sub>/FVC%  
180 [Rho= -0.142, p=0.214 and Rho=-0.043, p=0.707, respectively).

181 In participants with COPD, the proportion of hypersegmented neutrophils was positively  
182 associated with proportion of eosinophils (Rho=0.535, p=0.015) (Figure 4A) and negatively  
183 associated with cell viability (Rho= -0.697, p<0.001) (Figure 4B). This association was not  
184 observed in any other group or in the overall population (data not shown).

185  
186 To explore the correlation between proportion of eosinophils and hypersegmented neutrophils  
187 further we decided to examine the COPD participants according to their inflammatory subtype  
188 categorised as eosinophilic COPD (E-COPD) ( $\geq 3\%$  eosinophils) and non-eosinophilic COPD (NE-  
189 COPD) ( $< 3\%$  eosinophils).

## 191 Eosinophilic and non-eosinophilic COPD

1  
2  
3 192 Twelve participants were characterized as eosinophilic COPD (E-COPD) and eight participants  
4  
5 193 were characterized as non-eosinophilic COPD (NE-COPD). The NE-COPD group had a  
6  
7 194 significantly elevated total cell count [NE COPD, 1.71 (1.47); E COPD, 0.67 (0.55), p=0.037] and  
8  
9 195 cell viability [NE COPD, 90.82 (5.80); E COPD, 76.67 (14.64), p=0.019] along with significantly  
10  
11 196 elevated neutrophil proportion [NE COPD, 85.50 (77.00-92.38); E COPD, 75.75 (69.88-77.75),  
12  
13 197 p=0.037] and number [NE COPD, 148.37 (132.16); E COPD, 50.93 (42.95), p=0.028] in  
14  
15 198 comparison with E-COPD. The number and proportion of eosinophils were significantly higher in  
16  
17 199 ECOPD i.e. [NE COPD, 1.14 (1.05); E COPD, 4.71 (4.09), p=0.040] and [NE COPD, 1.09 (0.57);  
18  
19 200 E COPD, 9.08 (5.50), p<0.001], respectively. Besides this, no significant difference were observed  
20  
21 201 between these groups for other clinical parameters such as age, sex, lung function, ICS dose etc.  
22  
23  
24  
25  
26  
27 202  
28  
29

### 30 203 **Neutrophil subsets in eosinophilic and non-eosinophilic COPD**

31  
32 204 The proportion of normal neutrophils were significantly reduced while the proportion of  
33  
34 205 hypersegmented neutrophils were elevated (Figure 5 A & C, respectively) in E-COPD compared  
35  
36 206 with NE-COPD. While no significant differences were observed for the number of any individual  
37  
38 207 subset (Figure 5 D-F) between E and NE-COPD. There was also no significant difference for any  
39  
40 208 individual subset proportion or number in total eosinophilic (n=33) vs non eosinophils (n=45)  
41  
42 209 obstructive airway disease participants (data not shown).  
43  
44  
45  
46  
47 210  
48  
49 211  
50  
51  
52 212  
53  
54

## 55 213 **DISCUSSION**



1  
2  
3 214 The study identified three morphologically distinct subsets of neutrophils i.e. banded, normal, and  
4  
5 215 hypersegmented in the BL of participants with chronic obstructive airways disease patients and healthy  
6  
7  
8 216 controls. There were a significantly higher number of hypersegmented neutrophils in those with  
9  
10 217 obstructive airway disease compared with healthy controls. The proportion of hypersegmented  
11  
12 218 neutrophils was associated with lower FEV<sub>1</sub> and more severe airflow obstruction (FEV<sub>1</sub>/FVC %) in  
13  
14 219 obstructive airway disease participants and with the presence of eosinophilic airway inflammation in  
15  
16  
17 220 COPD.  
18  
19

20 221 The concept of morphological heterogeneity in neutrophil population has recently emerged<sup>25</sup>. We have  
21  
22 222 examined neutrophil heterogeneity in the bronchial lavage of obstructive airway disease participants  
23  
24 223 and healthy controls. The reason for neutrophil heterogeneity is unclear but may be attributable to the  
25  
26 224 different stages of cell maturation in the bone marrow before transition to the tissue, or alternatively,  
27  
28 225 neutrophils might change their morphology during the course of inflammation to adjust with the  
29  
30  
31 226 stressors in inflamed airways<sup>5 26</sup>.  
32  
33

34 227 Banded neutrophils are also known as immature neutrophils and are deemed incompetent in anti-  
35  
36 228 microbial immune functions as reported in the systemic circulation of sepsis patients<sup>27</sup>. The emergence  
37  
38 229 of banded neutrophils in the airway can occur after depletion of mature neutrophils in bone marrow  
39  
40  
41 230 following excessive demand during acute inflammation<sup>20</sup>.  
42  
43

44 231 The presence of hypersegmented neutrophils in airways could be an attribute of inflammation as the  
45  
46 232 hypersegmented neutrophils have also been reported in other inflammatory conditions such as trauma<sup>18</sup>  
47  
48 233 and in chronic inflammatory lung diseases such as ARDS<sup>19</sup>.  
49  
50

51  
52 234 The hypersegmented morphology of the neutrophil implies increased maturation compared with banded  
53  
54 235 and normal neutrophils<sup>18</sup>. Maturation is thought to occur in inflamed airways due to the presence of a  
55  
56  
57  
58  
59  
60

1  
2  
3 236 cytokine rich environment consisting of pro-survival mediators<sup>28</sup>. The mechanism behind formation of  
4  
5 237 hypersegmented neutrophils are known to be linked with the life cycle of the neutrophils. The increase  
6  
7  
8 238 in survival cause the nucleus of neutrophil to develop more indentation and segmentation, and hence the  
9  
10 239 hypersegmented neutrophils are also called as “old neutrophils”<sup>29</sup>.

11  
12  
13 240 The ability of a chemoattractant rich milieu to change the phenotype of neutrophils was recently shown  
14  
15 241 when neutrophils from the blood of healthy volunteers were incubated with the broncoalveolar lavage  
16  
17 242 from a patient with ARDS. These neutrophils altered their phenotype, with an increase in those with a  
18  
19 243 hypersegmented morphology<sup>19</sup>. It may be possible that a similar process is occurring chronically in the  
20  
21 244 airways of obstructive airway disease participants, who generally have higher levels of pro-  
22  
23 245 inflammatory cytokines and inflammatory mediators. Previous studies have demonstrated that  
24  
25 246 hypersegmented neutrophils in the circulation demonstrate low expression of L-selectins, which may  
26  
27 247 reduce their anchoring ability on endothelial cells and hence reduce their chances to egress into inflamed  
28  
29 248 airways<sup>30</sup>. Thus, it is possible that the hypersegmented neutrophils we observed in our study have not  
30  
31 249 directly come from circulation and instead may have become hypersegmented in the airways under the  
32  
33 250 influence of pro-survival mediators.

34  
35  
36 251 Mediators that promote neutrophil survival and can be present in the airways include; GM-CSF,  
37  
38 252 chemokines like CXCL-8 and lipid mediators such as serum amyloid A<sup>2,26</sup>. GM-CSF and CXCL-8 are  
39  
40 253 known to enhance neutrophil survival by promoting the expression of anti-apoptotic proteins like  
41  
42 254 survivins and by preventing TNF- $\alpha$  mediated apoptosis<sup>31,32</sup>. While serum amyloid A is known to prolong  
43  
44 255 neutrophil longevity by preventing mitochondrial damage and decreasing caspase-3 (apoptotic protein)  
45  
46 256 activity<sup>33</sup>. Our past studies have reported elevated levels of CXCL-8 in sputum samples of neutrophilic  
47  
48 257 asthma, bronchiectasis<sup>34</sup>, and COPD patients<sup>35</sup>. Beside this, we have also reported that elevated levels of  
49  
50 258 serum amyloid A in COPD was associated with neutrophilic inflammation in airways and this was  
51  
52  
53  
54  
55  
56  
57  
58  
59  
60

1  
2  
3 259 refractory to corticosteroids<sup>36</sup>. This suggests that the elevated presence of these markers might have  
4  
5 260 played some role in enhancing the survival of neutrophils in airways and promoting the presence of  
6  
7  
8 261 hypersegmented neutrophils.  
9

10  
11 262 In this study, we also reported a positive correlation between eosinophils and hypersegmented  
12  
13 263 neutrophils proportion in COPD participants along with elevated proportion of hypersegmented  
14  
15 264 neutrophils in E-COPD participants. The presence of eosinophils in airways can further elevate the level  
16  
17  
18 265 of GM-CSF due to their own production of this cytokine<sup>37</sup>, which can further promote maturation of  
19  
20 266 neutrophils. Beside this, the use of ICS to control eosinophilic inflammation may enhance neutrophil  
21  
22 267 survival in the inflamed airways by increasing the activity of anti-apoptotic proteins such as Mcl-1  
23  
24 268 (induced myeloid leukaemia cell differentiation protein) and IAPs (inhibitor of apoptosis proteins) in  
25  
26  
27 269 neutrophils<sup>38</sup>. This increased maturity and prevention of death may result in an increased proportion of  
28  
29 270 hypersegmented neutrophils.  
30

31  
32 271 There is also a debate about whether all hypersegmented neutrophils have same functional  
33  
34 272 characteristics. Pillay *et al*<sup>18</sup> observed that hypersegmented neutrophils obtained after inducing acute  
35  
36  
37 273 systemic inflammation were exhibiting immunosuppressive effect on T lymphocyte in an *in vitro* co-  
38  
39 274 culture. While in another study by Whitmore *et al*<sup>39</sup>, observed that neutrophils changed into a  
40  
41 275 hypersegmented phenotype following incubation with *H. Pylori*, which could then exhibit cytotoxic  
42  
43  
44 276 activity on stomach epithelial cells. But interestingly in both these study, hypersegmented neutrophils  
45  
46 277 exhibited their respective response by same mechanism i.e. by administering high amount of ROS  
47  
48 278 (reactive oxygen species) in respective cells, and also had similar pattern of adhesion molecules  
49  
50  
51 279 expression on their surface.  
52

53  
54 280 The significant association between the proportion of hypersegmented neutrophils with FEV<sub>1</sub> and  
55  
56 281 severe airflow obstruction in our study suggests that where hypersegmented neutrophils are common,  
57  
58

1  
2  
3 282 airway obstruction is poor. This could be a result of high oxidative burst produced by hypersegmented  
4  
5 283 neutrophils as observed in previous studies, in which hypersegmented neutrophil exhibited high  
6  
7  
8 284 oxidative burst after ex-vivo stimulation<sup>18 19</sup>. The generation of high oxidative burst by neutrophils  
9  
10 285 may also impair their timely clearance from the airway<sup>40</sup> and can trigger a vicious cycle of neutrophils  
11  
12 286 influx into the airways<sup>6</sup>. The impairment of neutrophil clearance in airway may cause necrosis of  
13  
14 287 neutrophils which can spill its cytotoxic content such as reactive oxygen species and proteolytic  
15  
16 288 enzymes like neutrophil elastase in the lumen of airways<sup>41</sup>. This can further damage airway wall and  
17  
18  
19 289 promote mucus hypersecretion which may result in significant decline in FEV<sub>1</sub> as earlier reported in a  
20  
21 290 study on COPD patients<sup>42</sup>. Interestingly, we did not observe this correlation with other neutrophil  
22  
23 291 subsets or with total neutrophil proportion or number. Further research is needed to understand if  
24  
25 292 hypersegmented neutrophils are common as a result of more severe disease or conversely if they  
26  
27  
28 293 influence disease severity.

30  
31 294 The cross-sectional nature of study is a limitation in properly establishing the cause and effect of  
32  
33 295 relationship of neutrophil heterogeneity in airways. A further detailed ex-vivo study of influence of  
34  
35 296 pathogen, pro-survival mediators, and current medications like ICS on neutrophil subsets morphology,  
36  
37 297 surface expressions, and functional behaviour is needed to provide a better understanding of the  
38  
39 298 formation of hypersegmented neutrophils in the airways and subsequently in developing a more  
40  
41 299 comprehensive strategy for assessment and management of airway neutrophilia.

## 42 43 44 45 300 **CONCLUSION**

46  
47  
48  
49 301 We have shown the presence of three morphologically different subsets of neutrophils in the airways  
50  
51 302 of healthy and obstructive airway disease participants i.e. asthma, COPD, and bronchiectasis. The  
52  
53 303 increased proportion of hypersegmented neutrophils in the airways of obstructive airway disease

1  
2  
3 304 participants was associated with reduced lung function of these participants. The proportion of  
4  
5 305 hypersegmented neutrophils was highest in COPD participants in comparison with all other groups.  
6  
7

8  
9 306

10  
11 307 **ACKNOWLEDGEMENTS**  
12  
13

14 308 We acknowledge technical support from Andrew Reid, Michelle Gleeson, Kellie Fakes and Bridgette  
15  
16 309 Donati and clinical support from Lorissa Hopkins and Douglas Dorahy of The Priority Research Centre  
17  
18 310 for Healthy Lungs.  
19  
20  
21

22 311

23  
24 312 **CONTRIBUTORS:** JLS developed the idea and designed the study. JLS also supervised and  
25  
26 313 coordinated the study throughout. RL performed the subtype counting and wrote the manuscript  
27  
28 314 which was further refined and edited by JLS, PABW, KB and DB. PABW performed the  
29  
30 315 bronchoscopy, KB supervised the bronchial lavage processing and cytospin preparation and DB  
31  
32 316 supervised the statistical analysis.  
33  
34  
35  
36  
37  
38  
39  
40  
41  
42  
43  
44  
45  
46  
47  
48  
49  
50  
51  
52  
53  
54  
55  
56  
57  
58  
59  
60

1  
2  
3  
4  
5  
6 **COMPETING INTERESTS:** None.  
7  
8  
9

10  
11  
12 **FUNDING:** This research received no specific grant from any funding agency in the public,  
13 commercial or not for profit sector.  
14  
15

16  
17  
18  
19  
20 **DATA SHARING STATEMENT:** Raw data can be obtained by contacting the corresponding  
21 author.  
22  
23  
24

## 25 26 27 28 **REFERENCES**

- 29 1. Wright HL, Moots RJ, Bucknall RC, et al. Neutrophil function in inflammation and inflammatory diseases. *Rheumatology (Oxford)* 2010;49(9):1618-31.
- 30 2. Amulic B, Cazalet C, Hayes GL, et al. Neutrophil function: from mechanisms to disease. *Annu Rev Immunol* 2012;30:459-89.
- 31 3. Zuo L, Lucas K, Fortuna CA, et al. Molecular Regulation of Toll-like Receptors in Asthma and COPD. *Front Physiol* 2015;6:312.
- 32 4. Konrad FM, Reutershan J. CXCR2 in acute lung injury. *Mediators Inflamm* 2012;2012:740987.
- 33 5. Bruijnzeel PL, Uddin M, Koenderman L. Targeting neutrophilic inflammation in severe neutrophilic asthma: can we target the disease-relevant neutrophil phenotype? *J Leukoc Biol* 2015;98(4):549-56.
- 34 6. Simpson JL, Phipps S, Gibson PG. Inflammatory mechanisms and treatment of obstructive airway diseases with neutrophilic bronchitis. *Pharmacol Ther* 2009;124(1):86-95.
- 35 7. Essilfie AT, Simpson JL, Dunkley ML, et al. Combined Haemophilus influenzae respiratory infection and allergic airways disease drives chronic infection and features of neutrophilic asthma. *Thorax* 2012;67(7):588-99.
- 36 8. Kirsty H, Rahul S, Richard R, et al. Defining Inflammatory Groups Within a COPD Cohort. B43 COPD: PHENOTYPES AND CLINICAL OUTCOMES: American Thoracic Society 2016:A3514-A14.
- 37 9. McDonald VM, Higgins I, Wood LG, et al. Multidimensional assessment and tailored interventions for COPD: respiratory utopia or common sense? *Thorax* 2013;68(7):691-4.
- 38 10. Dente FL, Bilotta M, Bartoli ML, et al. Neutrophilic Bronchial Inflammation Correlates with Clinical and Functional Findings in Patients with Noncystic Fibrosis Bronchiectasis. *Mediat Inflamm* 2015;2015:642503.

11. Reddel HK, Bateman ED, Becker A, et al. A summary of the new GINA strategy: a roadmap to asthma control. *Eur Respir J* 2015;46(3):622-39.
12. Bathoorn E, Kerstjens H, Postma D, et al. Airways inflammation and treatment during acute exacerbations of COPD. *International Journal of Chronic Obstructive Pulmonary Disease* 2008;3(2):217-29.
13. Chang AB, Bell SC, Byrnes CA, et al. Chronic suppurative lung disease and bronchiectasis in children and adults in Australia and New Zealand. *Med J Aust* 2010;193(6):356-65.
14. Simpson JL, Scott R, Boyle MJ, et al. Inflammatory subtypes in asthma: assessment and identification using induced sputum. *Respirology* 2006;11(1):54-61.
15. Beeh KM, Beier J. Handle with care: targeting neutrophils in chronic obstructive pulmonary disease and severe asthma? *Clin Exp Allergy* 2006;36(2):142-57.
16. Mardh CK, Root J, Uddin M, et al. Targets of Neutrophil Influx and Weaponry: Therapeutic Opportunities for Chronic Obstructive Airway Disease. *J Immunol Res* 2017;2017:5273201.
17. Shaw DE, Berry MA, Hargadon B, et al. Association between neutrophilic airway inflammation and airflow limitation in adults with asthma. *Chest* 2007;132(6):1871-5.
18. Pillay J, Kamp VM, van Hoffen E, et al. A subset of neutrophils in human systemic inflammation inhibits T cell responses through Mac-1. *J Clin Invest* 2012;122(1):327-36.
19. Juss JK, House D, Amour A, et al. Acute Respiratory Distress Syndrome Neutrophils Have a Distinct Phenotype and Are Resistant to Phosphoinositide 3-Kinase Inhibition. *Am J Respir Crit Care Med* 2016;194(8):961-73.
20. Cortjens B, Ingelse SA, Calis JC, et al. Neutrophil subset responses in infants with severe viral respiratory infection. *Clin Immunol* 2017;176:100-06.
21. Tak T, Wijten P, Heeres M, et al. Human CD62L(dim) neutrophils identified as a separate subset by proteome profiling and in vivo pulse-chase labeling. *Blood* 2017;129(26):3476-85.
22. Koshak EA. Classification of asthma according to revised 2006 GINA: Evolution from severity to control. *Annals of Thoracic Medicine* 2007;2(2):45-46.
23. Yusen RD. Evolution of the GOLD Documents for the Diagnosis, Management, and Prevention of Chronic Obstructive Pulmonary Disease. Controversies and Questions. *American Journal of Respiratory and Critical Care Medicine* 2013;188(1):4-5.
24. Chalmers JD, Goeminne P, Aliberti S, et al. The bronchiectasis severity index. An international derivation and validation study. *Am J Respir Crit Care Med* 2014;189(5):576-85.
25. Silvestre-Roig C, Hidalgo A, Soehnlein O. Neutrophil heterogeneity: implications for homeostasis and pathogenesis. *Blood* 2016;127(18):2173-81.
26. Kolaczowska E, Kubes P. Neutrophil recruitment and function in health and inflammation. *Nat Rev Immunol* 2013;13(3):159-75.
27. Taneja R, Sharma AP, Hallett MB, et al. Immature circulating neutrophils in sepsis have impaired phagocytosis and calcium signaling. *Shock* 2008;30(6):618-22.
28. Uddin M, Nong G, Ward J, et al. Prosurvival activity for airway neutrophils in severe asthma. *Thorax* 2010;65(8):684-9.
29. Pillay J, Tak T, Kamp VM, et al. Immune suppression by neutrophils and granulocytic myeloid-derived suppressor cells: similarities and differences. *Cell Mol Life Sci* 2013;70(20):3813-27.
30. Kamp VM, Pillay J, Lammers JW, et al. Human suppressive neutrophils CD16bright/CD62Ldim exhibit decreased adhesion. *Journal of leukocyte biology* 2012;92(5):1011-20.
31. Gabelloni ML, Trevani AS, Sabatté J, et al. Mechanisms regulating neutrophil survival and cell death. *Seminars in Immunopathology* 2013;35(4):423-37.
32. Kettritz R, Gaido ML, Haller H, et al. Interleukin-8 delays spontaneous and tumor necrosis factor-alpha-mediated apoptosis of human neutrophils. *Kidney Int* 1998;53(1):84-91.



- 1  
2  
3 33. Kebir DE, Jozsef L, Khreiss T, et al. Serum amyloid A (SAA) prevents mitochondrial dysfunction and delays  
4 constitutive neutrophil apoptosis. *The FASEB Journal* 2007;21(5):A13.  
5 34. Simpson JL, Grissell TV, Douwes J, et al. Innate immune activation in neutrophilic asthma and  
6 bronchiectasis. *Thorax* 2007;62(3):211-8.  
7 35. Baines KJ, Simpson JL, Gibson PG. Innate Immune Responses Are Increased in Chronic Obstructive  
8 Pulmonary Disease. *PLoS ONE* 2011;6(3):e18426.  
9 36. Bozinovski S, Uddin M, Vlahos R, et al. Serum amyloid A opposes lipoxin A(4) to mediate glucocorticoid  
10 refractory lung inflammation in chronic obstructive pulmonary disease. *Proc Natl Acad Sci U S A*  
11 2012;109(3):935-40.  
12 37. Esnault S, Malter JS. GM-CSF regulation in eosinophils. *Arch Immunol Ther Exp (Warsz)* 2002;50(2):121-  
13 30.  
14 38. Saffar AS, Ashdown H, Gounni AS. The Molecular Mechanisms of Glucocorticoids-Mediated Neutrophil  
15 Survival. *Current Drug Targets* 2011;12(4):556-62.  
16 39. Whitmore LC, Weems MN, Allen LH. Cutting Edge: Helicobacter pylori Induces Nuclear  
17 Hypersegmentation and Subtype Differentiation of Human Neutrophils In Vitro. *J Immunol*  
18 2017;198(5):1793-97.  
19 40. Simpson JL, Gibson PG, Yang IA, et al. Impaired macrophage phagocytosis in non-eosinophilic asthma.  
20 *Clin Exp Allergy* 2013;43(1):29-35.  
21 41. Kim S, Nadel JA. Role of neutrophils in mucus hypersecretion in COPD and implications for therapy. *Treat*  
22 *Respir Med* 2004;3(3):147-59.  
23 42. Vestbo J, Prescott E, Lange P. Association of chronic mucus hypersecretion with FEV1 decline and chronic  
24 obstructive pulmonary disease morbidity. Copenhagen City Heart Study Group. *Am J Respir Crit Care*  
25 *Med* 1996;153(5):1530-5.  
26  
27  
28  
29  
30  
31  
32  
33  
34  
35  
36  
37  
38  
39  
40  
41  
42  
43  
44  
45  
46  
47  
48  
49  
50  
51  
52  
53  
54  
55  
56  
57  
58  
59  
60



**FIGURES LEGENDS:**

**Figure 1:** Subsets of neutrophils characterized as per number of lobes in their nucleus. (A) A representative pictomicrograph of BL cytospin of obstructive airway disease participants (X 100 original magnification, MGG stain) consist of (B) Banded neutrophil, (c) Normal neutrophil, and (D) Hypersegmented neutrophil.

**Figure 2:** Neutrophil subset number (A-C) and neutrophil subset proportion (D-F) in BL of participants with bronchiectasis, COPD, asthma, and healthy controls. The line in dot plots of each group represents the median.  $\wedge p < 0.0125$  compared with healthy controls, \*  $p < 0.0125$  compared with asthma and #  $p < 0.0125$  compared with COPD, as per Kruskal-Wallis test.

**Figure 3:** Scatterplot of hypersegmented neutrophil proportion vs  $FEV_1\%$  predicted (A) and  $FEV_1/FVC$  (B) in BL of obstructive airway disease participant's.

**Figure 4:** (A) Scatterplot of hypersegmented neutrophils proportion vs eosinophils proportion, (B) viability of total cells in BL of COPD participants.

**Figure 5:** Neutrophil subsets proportion (A-C) and neutrophil subsets number (D-F) in bronchial lavage of eosinophilic (E-COPD) and non-eosinophilic COPD (NE-COPD) participants. The line in dot plots of each group represents the median and the p value in each graph is an outcome of Wilcoxon rank-sum test.



Figure 1: Subtypes of neutrophils characterized as per number of lobes in their nucleus. (A) A representative pictomicrograph of BL cytospin of obstructive airway disease participants( X 100 original magnification, MGG stain) consist of (B) Banded neutrophil, (c) Normal neutrophil, and (D) Hypersegmented neutrophil.

153x146mm (300 x 300 DPI)

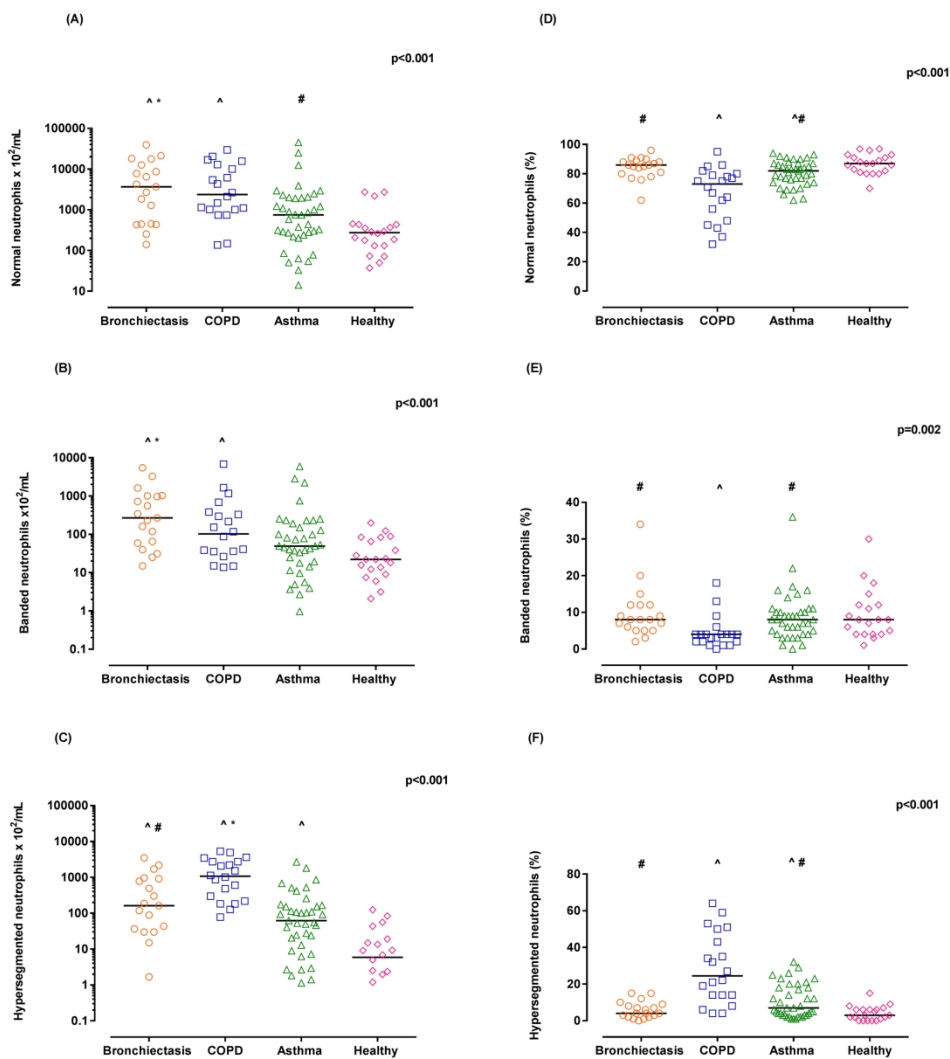

Figure 2: Neutrophil subset number (A-C) and neutrophil subset proportion (D-F) in BL of participants with bronchiectasis, COPD, asthma, and healthy controls. The line in dot plots of each group represents the median. ^p < 0.0125 compared with healthy controls, \* p < 0.0125 compared with asthma and # p < 0.0125 compared with COPD, as per Kruskal-Wallis test.

217x237mm (300 x 300 DPI)

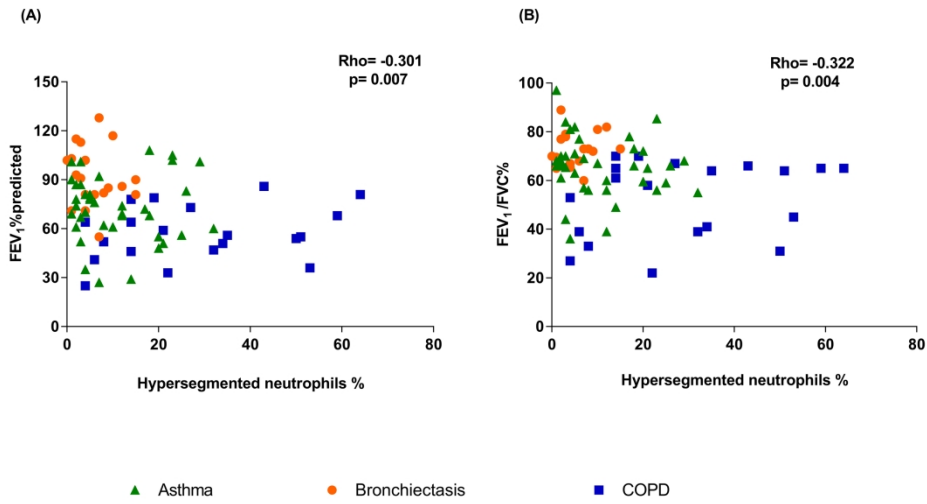

Figure 3: Scatterplot of hypersegmented neutrophil proportion vs FEV<sub>1</sub>% predicted (A) and FEV<sub>1</sub>/FVC (B) in BL of obstructive airway disease participant's.

248x134mm (300 x 300 DPI)

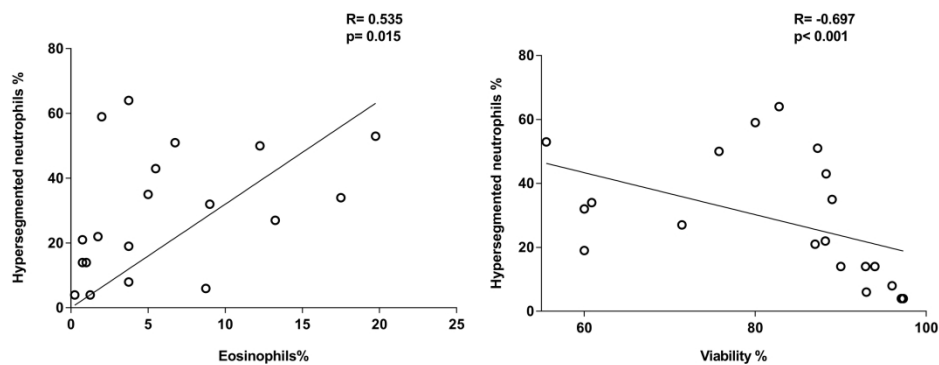

Figure 4: (A) Scatterplot of hypersegmented neutrophils proportion vs eosinophils proportion, (B) viability of total cells in BL of COPD participants.

268x108mm (300 x 300 DPI)

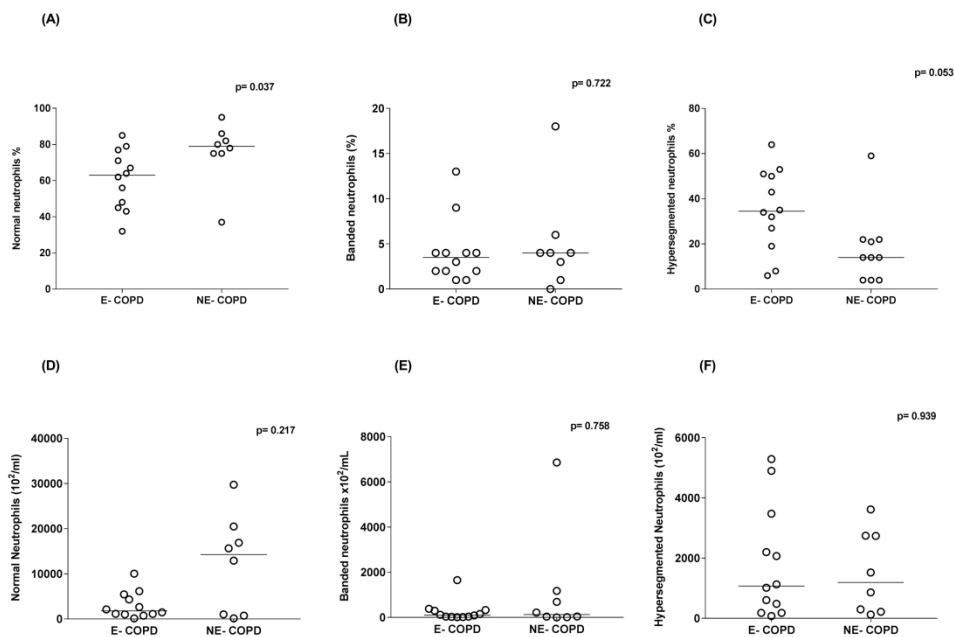

Figure 5: Neutrophil subsets proportion (A-C) and neutrophil subsets number (D-F) in bronchial lavage of eosinophilic (E-COPD) and non-eosinophilic COPD (NE-COPD) participants. The line in dot plots of each group represents the median and the p value in each graph is an outcome of Wilcoxon rank-sum test.

280x185mm (300 x 300 DPI)

**Supplementary data:***Table S1: Possible causes of bronchiectasis in bronchiectasis group (n=18).*

| <b>Causes of Bronchiectasis</b> | <b>Number of participants (n), (%)</b> |
|---------------------------------|----------------------------------------|
| Idiopathic                      | 10 (55.55)                             |
| Post-infection                  | 6 (33.33)                              |
| Immune deficient                | 1 (5.56)                               |
| Ciliary dyskinesia              | 0 (0)                                  |
| COPD                            | 0 (0)                                  |
| Asthma                          | 0 (0)                                  |
| Others                          | 1 (5.56)                               |

# Reporting checklist for cross sectional study.

Based on the STROBE cross sectional guidelines.

## Instructions to authors

Complete this checklist by entering the page numbers from your manuscript where readers will find each of the items listed below.

Your article may not currently address all the items on the checklist. Please modify your text to include the missing information. If you are certain that an item does not apply, please write "n/a" and provide a short explanation.

Upload your completed checklist as an extra file when you submit to a journal.

In your methods section, say that you used the STROBE cross sectional reporting guidelines, and cite them as:

von Elm E, Altman DG, Egger M, Pocock SJ, Gøtzsche PC, Vandenbroucke JP. The Strengthening the Reporting of Observational Studies in Epidemiology (STROBE) Statement: guidelines for reporting observational studies.

|                        |                     | Reporting Item                                                                                                                           | Page Number |
|------------------------|---------------------|------------------------------------------------------------------------------------------------------------------------------------------|-------------|
| Title                  | <a href="#">#1a</a> | Indicate the study's design with a commonly used term in the title or the abstract                                                       | 3           |
| Abstract               | <a href="#">#1b</a> | Provide in the abstract an informative and balanced summary of what was done and what was found                                          | 3           |
| Background / rationale | <a href="#">#2</a>  | Explain the scientific background and rationale for the investigation being reported                                                     | 5           |
| Objectives             | <a href="#">#3</a>  | State specific objectives, including any prespecified hypotheses                                                                         | 6           |
| Study design           | <a href="#">#4</a>  | Present key elements of study design early in the paper                                                                                  | 6           |
| Setting                | <a href="#">#5</a>  | Describe the setting, locations, and relevant dates, including periods of recruitment, exposure, follow-up, and data collection          | 6-7         |
| Eligibility criteria   | <a href="#">#6a</a> | Give the eligibility criteria, and the sources and methods of selection of participants.                                                 | 6-7         |
|                        | <a href="#">#7</a>  | Clearly define all outcomes, exposures, predictors, potential confounders, and effect modifiers. Give diagnostic criteria, if applicable | 6-7         |



|    |                |                      |                                                                   |                                              |
|----|----------------|----------------------|-------------------------------------------------------------------|----------------------------------------------|
| 1  | Data sources / | <a href="#">#8</a>   | For each variable of interest give sources of data and details of | 6-7                                          |
| 2  | measurement    |                      | methods of assessment (measurement). Describe                     |                                              |
| 3  |                |                      | comparability of assessment methods if there is more than one     |                                              |
| 4  |                |                      | group. Give information separately for for exposed and            |                                              |
| 5  |                |                      | unexposed groups if applicable.                                   |                                              |
| 6  |                |                      |                                                                   |                                              |
| 7  |                |                      |                                                                   |                                              |
| 8  |                |                      |                                                                   |                                              |
| 9  | Bias           | <a href="#">#9</a>   | Describe any efforts to address potential sources of bias         | 6-7, study utilized standard guidelines to   |
| 10 |                |                      |                                                                   | formulate exclusion and inclusion criteria   |
| 11 |                |                      |                                                                   | for every group to limit the selection bias. |
| 12 |                |                      |                                                                   |                                              |
| 13 |                |                      |                                                                   |                                              |
| 14 |                |                      |                                                                   |                                              |
| 15 | Study size     | <a href="#">#10</a>  | Explain how the study size was arrived at                         | 6, (described in study group section")       |
| 16 |                |                      |                                                                   |                                              |
| 17 | Quantitative   | <a href="#">#11</a>  | Explain how quantitative variables were handled in the            | 8                                            |
| 18 | variables      |                      | analyses. If applicable, describe which groupings were chosen,    |                                              |
| 19 |                |                      | and why                                                           |                                              |
| 20 |                |                      |                                                                   |                                              |
| 21 |                |                      |                                                                   |                                              |
| 22 | Statistical    | <a href="#">#12a</a> | Describe all statistical methods, including those used to         | 8                                            |
| 23 | methods        |                      | control for confounding                                           |                                              |
| 24 |                |                      |                                                                   |                                              |
| 25 |                |                      |                                                                   |                                              |
| 26 |                | <a href="#">#12b</a> | Describe any methods used to examine subgroups and                | n/a...we examined COPD subgroups             |
| 27 |                |                      | interactions                                                      | (Eosinophilic and Non-Eosinophilic)          |
| 28 |                |                      |                                                                   | based on pre-defined cut off values on       |
| 29 |                |                      |                                                                   | page 12-14.                                  |
| 30 |                |                      |                                                                   |                                              |
| 31 |                |                      |                                                                   |                                              |
| 32 |                |                      |                                                                   |                                              |
| 33 |                | <a href="#">#12c</a> | Explain how missing data were addressed                           | Missing data were excluded from              |
| 34 |                |                      |                                                                   | analysis.                                    |
| 35 |                |                      |                                                                   |                                              |
| 36 |                |                      |                                                                   |                                              |
| 37 |                | <a href="#">#12d</a> | If applicable, describe analytical methods taking account of      | n/a. The study did not use any analytical    |
| 38 |                |                      | sampling strategy                                                 | method.                                      |
| 39 |                |                      |                                                                   |                                              |
| 40 |                |                      |                                                                   |                                              |
| 41 |                | <a href="#">#12e</a> | Describe any sensitivity analyses                                 | n/a. No sensitive analysis were performed    |
| 42 |                |                      |                                                                   | in this study.                               |
| 43 |                |                      |                                                                   |                                              |
| 44 |                |                      |                                                                   |                                              |
| 45 | Participants   | <a href="#">#13a</a> | Report numbers of individuals at each stage of study—eg           | n/a...Since it was just a one visit study,   |
| 46 |                |                      | numbers potentially eligible, examined for eligibility,           | the participant only included if they met    |
| 47 |                |                      | confirmed eligible, included in the study, completing follow-     | the inclusion criteria and hence             |
| 48 |                |                      | up, and analysed. Give information separately for for exposed     | participant number were same throughout      |
| 49 |                |                      | and unexposed groups if applicable.                               | the study.                                   |
| 50 |                |                      |                                                                   |                                              |
| 51 |                |                      |                                                                   |                                              |
| 52 |                |                      |                                                                   |                                              |
| 53 |                |                      |                                                                   |                                              |
| 54 |                | <a href="#">#13b</a> | Give reasons for non-participation at each stage                  | n/a... No non-participation to report for    |
| 55 |                |                      |                                                                   | this study.                                  |
| 56 |                |                      |                                                                   |                                              |
| 57 |                |                      |                                                                   |                                              |
| 58 |                | <a href="#">#13c</a> | Consider use of a flow diagram                                    | n/a                                          |
| 59 |                |                      |                                                                   |                                              |
| 60 |                |                      |                                                                   |                                              |

|    |                  |                      |                                                                                                                                                                                                                   |                                                                            |
|----|------------------|----------------------|-------------------------------------------------------------------------------------------------------------------------------------------------------------------------------------------------------------------|----------------------------------------------------------------------------|
| 1  | Descriptive data | <a href="#">#14a</a> | Give characteristics of study participants (eg demographic, clinical, social) and information on exposures and potential confounders. Give information separately for exposed and unexposed groups if applicable. | 10                                                                         |
| 2  |                  |                      |                                                                                                                                                                                                                   |                                                                            |
| 3  |                  |                      |                                                                                                                                                                                                                   |                                                                            |
| 4  |                  |                      |                                                                                                                                                                                                                   |                                                                            |
| 5  |                  |                      |                                                                                                                                                                                                                   |                                                                            |
| 6  |                  |                      |                                                                                                                                                                                                                   |                                                                            |
| 7  |                  |                      |                                                                                                                                                                                                                   |                                                                            |
| 8  |                  | <a href="#">#14b</a> | Indicate number of participants with missing data for each variable of interest                                                                                                                                   | 10 (Table 1...spirometry data for only 19 healthy participants out of 20). |
| 9  |                  |                      |                                                                                                                                                                                                                   |                                                                            |
| 10 |                  |                      |                                                                                                                                                                                                                   |                                                                            |
| 11 | Outcome data     | <a href="#">#15</a>  | Report numbers of outcome events or summary measures. Give information separately for exposed and unexposed groups if applicable.                                                                                 | 8                                                                          |
| 12 |                  |                      |                                                                                                                                                                                                                   |                                                                            |
| 13 |                  |                      |                                                                                                                                                                                                                   |                                                                            |
| 14 |                  |                      |                                                                                                                                                                                                                   |                                                                            |
| 15 |                  |                      |                                                                                                                                                                                                                   |                                                                            |
| 16 | Main results     | <a href="#">#16a</a> | Give unadjusted estimates and, if applicable, confounder-adjusted estimates and their precision (eg, 95% confidence interval). Make clear which confounders were adjusted for and why they were included          | 7-14                                                                       |
| 17 |                  |                      |                                                                                                                                                                                                                   |                                                                            |
| 18 |                  |                      |                                                                                                                                                                                                                   |                                                                            |
| 19 |                  |                      |                                                                                                                                                                                                                   |                                                                            |
| 20 |                  | <a href="#">#16b</a> | Report category boundaries when continuous variables were categorized                                                                                                                                             | 14                                                                         |
| 21 |                  |                      |                                                                                                                                                                                                                   |                                                                            |
| 22 |                  |                      |                                                                                                                                                                                                                   |                                                                            |
| 23 |                  |                      |                                                                                                                                                                                                                   |                                                                            |
| 24 |                  | <a href="#">#16c</a> | If relevant, consider translating estimates of relative risk into absolute risk for a meaningful time period                                                                                                      | n/a...was not relevant in this study.                                      |
| 25 |                  |                      |                                                                                                                                                                                                                   |                                                                            |
| 26 |                  |                      |                                                                                                                                                                                                                   |                                                                            |
| 27 |                  |                      |                                                                                                                                                                                                                   |                                                                            |
| 28 | Other analyses   | <a href="#">#17</a>  | Report other analyses done—e.g., analyses of subgroups and interactions, and sensitivity analyses                                                                                                                 | 12-14                                                                      |
| 29 |                  |                      |                                                                                                                                                                                                                   |                                                                            |
| 30 |                  |                      |                                                                                                                                                                                                                   |                                                                            |
| 31 |                  |                      |                                                                                                                                                                                                                   |                                                                            |
| 32 | Key results      | <a href="#">#18</a>  | Summarise key results with reference to study objectives                                                                                                                                                          | 15                                                                         |
| 33 |                  |                      |                                                                                                                                                                                                                   |                                                                            |
| 34 |                  |                      |                                                                                                                                                                                                                   |                                                                            |
| 35 |                  |                      |                                                                                                                                                                                                                   |                                                                            |
| 36 | Limitations      | <a href="#">#19</a>  | Discuss limitations of the study, taking into account sources of potential bias or imprecision. Discuss both direction and magnitude of any potential bias.                                                       | 17                                                                         |
| 37 |                  |                      |                                                                                                                                                                                                                   |                                                                            |
| 38 |                  |                      |                                                                                                                                                                                                                   |                                                                            |
| 39 |                  |                      |                                                                                                                                                                                                                   |                                                                            |
| 40 |                  |                      |                                                                                                                                                                                                                   |                                                                            |
| 41 |                  |                      |                                                                                                                                                                                                                   |                                                                            |
| 42 |                  |                      |                                                                                                                                                                                                                   |                                                                            |
| 43 | Interpretation   | <a href="#">#20</a>  | Give a cautious overall interpretation considering objectives, limitations, multiplicity of analyses, results from similar studies, and other relevant evidence.                                                  | 15-17                                                                      |
| 44 |                  |                      |                                                                                                                                                                                                                   |                                                                            |
| 45 |                  |                      |                                                                                                                                                                                                                   |                                                                            |
| 46 |                  |                      |                                                                                                                                                                                                                   |                                                                            |
| 47 |                  |                      |                                                                                                                                                                                                                   |                                                                            |
| 48 |                  |                      |                                                                                                                                                                                                                   |                                                                            |
| 49 | Generalisability | <a href="#">#21</a>  | Discuss the generalisability (external validity) of the study results                                                                                                                                             | n/a                                                                        |
| 50 |                  |                      |                                                                                                                                                                                                                   |                                                                            |
| 51 |                  |                      |                                                                                                                                                                                                                   |                                                                            |
| 52 |                  |                      |                                                                                                                                                                                                                   |                                                                            |
| 53 | Funding          | <a href="#">#22</a>  | Give the source of funding and the role of the funders for the present study and, if applicable, for the original study on which the present article is based                                                     | 2                                                                          |
| 54 |                  |                      |                                                                                                                                                                                                                   |                                                                            |
| 55 |                  |                      |                                                                                                                                                                                                                   |                                                                            |
| 56 |                  |                      |                                                                                                                                                                                                                   |                                                                            |
| 57 |                  |                      |                                                                                                                                                                                                                   |                                                                            |
| 58 |                  |                      |                                                                                                                                                                                                                   |                                                                            |
| 59 |                  |                      |                                                                                                                                                                                                                   |                                                                            |
| 60 |                  |                      |                                                                                                                                                                                                                   |                                                                            |

1 The STROBE checklist is distributed under the terms of the Creative Commons Attribution License CC-BY. This checklist can be  
2 completed online using <https://www.goodreports.org/>, a tool made by the [EQUATOR Network](#) in collaboration with [Penelope.ai](#)  
3  
4  
5  
6  
7  
8  
9  
10  
11  
12  
13  
14  
15  
16  
17  
18  
19  
20  
21  
22  
23  
24  
25  
26  
27  
28  
29  
30  
31  
32  
33  
34  
35  
36  
37  
38  
39  
40  
41  
42  
43  
44  
45  
46  
47  
48  
49  
50  
51  
52  
53  
54  
55  
56  
57  
58  
59  
60

For peer review only

# BMJ Open

## Hypersegmented airway neutrophils and its association with reduced lung function in adults with obstructive airway disease: An exploratory study.

|                                 |                                                                                                                                                                                                                                                                                                                                                                                                                                                                                                                                                         |
|---------------------------------|---------------------------------------------------------------------------------------------------------------------------------------------------------------------------------------------------------------------------------------------------------------------------------------------------------------------------------------------------------------------------------------------------------------------------------------------------------------------------------------------------------------------------------------------------------|
| Journal:                        | <i>BMJ Open</i>                                                                                                                                                                                                                                                                                                                                                                                                                                                                                                                                         |
| Manuscript ID                   | bmjopen-2018-024330.R2                                                                                                                                                                                                                                                                                                                                                                                                                                                                                                                                  |
| Article Type:                   | Research                                                                                                                                                                                                                                                                                                                                                                                                                                                                                                                                                |
| Date Submitted by the Author:   | 29-Nov-2018                                                                                                                                                                                                                                                                                                                                                                                                                                                                                                                                             |
| Complete List of Authors:       | Lokwani, Ravi; University of Newcastle School of Medicine and Public Health, Priority Research Centre for Healthy Lungs, Faculty of Health and Medicine,<br>Wark, Peter; Centre for Asthma and Respiratory Disease University of Newcastle, Respiratory and Sleep Medicine<br>Baines, Katherine; University of Newcastle, Respiratory and Sleep Medicine<br>Barker, Daniel; University of Newcastle School of Medicine and Public Health, Faculty of Health and Medicine<br>Simpson, Jodie; The University of Newcastle, Respiratory and Sleep Medicine |
| <b>Primary Subject Heading</b>: | Respiratory medicine                                                                                                                                                                                                                                                                                                                                                                                                                                                                                                                                    |
| Secondary Subject Heading:      | Immunology (including allergy)                                                                                                                                                                                                                                                                                                                                                                                                                                                                                                                          |
| Keywords:                       | Immunology < THORACIC MEDICINE, Bronchoscopy < THORACIC MEDICINE, Chronic airways disease < THORACIC MEDICINE                                                                                                                                                                                                                                                                                                                                                                                                                                           |
|                                 |                                                                                                                                                                                                                                                                                                                                                                                                                                                                                                                                                         |

SCHOLARONE™  
Manuscripts

1  
2  
3 **Hypersegmented airway neutrophils and its association with reduced lung function in**  
4 **adults with obstructive airway disease: An exploratory study.**  
5  
6

7  
8 **Authors:** Ravi Lokwani <sup>1,3</sup>, Peter AB Wark <sup>1-3</sup>, Katherine J Baines <sup>1,3</sup>, Daniel Barker <sup>3</sup>, Jodie L  
9  
10 Simpson <sup>1-3</sup>  
11

12  
13 **Affiliations:**  
14

15  
16 **1:** Priority Research Centre for Healthy Lungs, Faculty of Health and Medicine, Hunter Medical  
17  
18 Research Institute, University of Newcastle, Callaghan NSW 2308, Australia.  
19

20  
21 **2:** Department of Respiratory and Sleep Medicine, John Hunter Hospital, New Lambton Heights,  
22  
23 NSW, 2305, Australia.  
24

25  
26 **3:** School of Medicine and Public Health, Faculty of Health and Medicine, University of  
27  
28 Newcastle, Callaghan NSW 2308, Australia.  
29  
30

31  
32 **Corresponding Author:**  
33

34  
35 Professor Jodie L Simpson  
36

37  
38 Level 2, East Wing, Hunter Medical Research Institute,  
39

40  
41 Locked Bag 1000, New Lambton, NSW 2305, Australia.  
42

43  
44 Email: jodie.simpson@newcastle.edu.au  
45

46  
47 Phone: 61 2 40420148 Fax: 61 2 49855850  
48  
49

50 **Key words:** Immunology, Chronic airways disease, Bronchoscopy.  
51  
52

53  
54  
55 **Word**

**count:**

3230

1  
2  
3 **1 ABSTRACT:**  
4

5  
6 **2 Objectives:** The significance of neutrophilic inflammation in obstructive airway disease remains  
7  
8 **3** controversial. Recent studies have demonstrated presence of an active neutrophil population in systemic  
9  
10 **4** circulation, featuring hypersegmented morphology, with high oxidative burst and functional plasticity in  
11  
12 **5** inflammatory conditions. The aim of this study was to characterize neutrophil subsets in bronchial lavage  
13  
14 **6** (BL) of obstructive airway disease participants (asthma, COPD and bronchiectasis) and healthy controls  
15  
16 **7** on the basis of nuclear morphology and to assess the association between neutrophil subsets and the  
17  
18 **8** clinical parameters of the obstructive airway disease participants.  
19

20  
21 **9 Design:** A cross-sectional exploratory study.  
22

23  
24 **10 Setting:** John Hunter Hospital and Hunter Medical Research Institute, Australia.  
25

26  
27 **11 Participants:** Seventy-eight adults with obstructive airway disease comprised of those with stable asthma  
28  
29 **12** (n=39) COPD (n=20), and bronchiectasis (n=19) and 20 healthy controls.  
30

31  
32 **13 Material and Methods:** Cytospins were prepared and neutrophil subsets were classified based on  
33  
34 **14** nuclear morphology into hypersegmented (>4 lobes), normal (2-4 lobes) and banded (1 lobe) neutrophils  
35  
36 **15** and enumerated.  
37

38  
39 **16 Results:** Neutrophils from each subset were identified in all participants. Numbers of hypersegmented  
40  
41 **17** neutrophils were elevated in participants with airway disease compared with healthy controls ( $p < 0.001$ ).  
42  
43 **18** Both the number and proportion of hypersegmented neutrophils were highest in COPD participants  
44  
45 **19** (median (q1-q3) of 1073.6 (258.8-2742)  $\times 10^2/\text{mL}$  and 24.5 (14.0-46.5) %, respectively). An increased  
46  
47 **20** proportion of hypersegmented neutrophils in airway disease participants was significantly associated with  
48  
49 **21** lower FEV<sub>1</sub>/FVC % (spearman's Rho= -0.322,  $p = 0.004$ ).  
50

51  
52 **22 Conclusion:** Neutrophil heterogeneity is common in bronchial lavage and is associated with more severe  
53  
54 **23** airflow obstruction in adults with airways disease. Further work is required to elucidate the functional  
55  
56 **24** consequences of hypersegmented neutrophils in the pathogenesis of disease.  
57

58  
59 **25 Word count:** 266  
60

## 26 STRENGTHS AND LIMITATION OF STUDY

- 27 ➤ This is the first exploratory study to characterize three morphologically different subsets  
28 of neutrophils in bronchial lavage of adults with obstructive airway disease and healthy  
29 controls.  
30 ➤ The study investigated clinical association of neutrophils subset with airway obstruction.  
31 ➤ The cross-sectional nature of study is a limitation in properly understanding the reason  
32 behind neutrophil heterogeneity in airways.

## 47 INTRODUCTION:

48 Neutrophils are phagocytic innate immune cells which patrol the blood vessels and become  
49 activated in response to inflammatory triggers<sup>1</sup>. Activation results in neutrophil migration to the  
50 site of infection, where pathogens can be eliminated by phagocytosis or NETosis<sup>2</sup>. Similarly,  
51 infection or injury can result in the initiation of an innate immune response following the  
52 engagement of PAMPs (pathogen associated molecular patterns) and DAMPs (damage  
53 associated molecular patterns) with pattern recognition receptors of airways. This facilitates the  
54 release of chemotactic stimuli such as CXCL8, IL-1 $\beta$ , and TNF- $\alpha$ , resulting in neutrophil  
55 recruitment to the airways<sup>3</sup>, which is important for the resolution of infection and inflammation  
56<sup>4</sup>. In contrast, a disproportionate or dysregulated influx or efflux of neutrophils can result in  
57 persistent neutrophilic airway inflammation and tissue damage<sup>5</sup>.

58 Inflammation characterised by airway neutrophilia is reported in many cases of chronic  
59 obstructive airway disease<sup>6</sup>. This includes 20-30% cases of asthma<sup>7</sup>, more than 40% cases of  
60 chronic obstructive pulmonary disease (COPD)<sup>8,9</sup>, and 70% cases of non-cystic fibrosis (CF)  
61 bronchiectasis<sup>10</sup>. Current therapeutic and management strategies for asthma and COPD focus  
62 on bronchodilation to overcome airflow limitation, or inhaled corticosteroids based therapies for  
63 the modification of eosinophilic airway inflammation.<sup>11,12</sup> In non-CF bronchiectasis, treatment  
64 relies on antibiotics to control the infective nature of the disease<sup>13</sup>. While inhaled corticosteroids  
65 are highly effective in modifying eosinophilic inflammation in the airways<sup>14</sup>, there are no  
66 treatments that have been shown to influence neutrophil mediated inflammation. One of the  
67 primary reasons behind this is our lack of understanding about neutrophils<sup>15,16</sup>.

68 Despite the fact that previous studies have shown an association between elevated neutrophils in  
69 airways with lower FEV<sub>1</sub> in obstructive airway disease<sup>17</sup>, little is known about variations within  
70 the population of neutrophils in the airways. Recent studies have identified heterogeneity within



1  
2  
3 71 circulating neutrophils. Pillay, *et al*<sup>18</sup> identified three subsets of neutrophils (normal, banded and  
4  
5 72 hypersegmented) in the circulation following an inflammatory challenge. Each subset had a  
6  
7 73 distinct nuclear morphology and pattern of surface adhesion molecule expression, with  
8  
9  
10 74 hypersegmented neutrophils showing increased capacity for oxidative burst along with a unique  
11  
12 75 ability to suppress T lymphocytes activation. The same morphologically distinct subsets have  
13  
14 76 been identified in both bronchial lavage (BL) and blood from patients with acute respiratory  
15  
16 77 distress syndrome<sup>19</sup> and in infants with severe viral respiratory infection<sup>20</sup>.

17  
18  
19  
20 78 The presence and characteristics of neutrophil subsets in obstructive airways disease is unknown.  
21  
22 79 In this exploratory study, we have characterised and estimated neutrophil subsets in BL fluid  
23  
24 80 from adults with asthma, COPD, non-CF bronchiectasis and healthy controls. In addition we  
25  
26 81 have explored the association of these subsets with the clinical characteristics of obstructive  
27  
28 82 airway disease participants.  
29  
30

## 31 32 83 33 34 35 84 **MATERIAL AND METHODS:**

36  
37  
38 85 **Patient and Public Involvement (PPI):** Patients and or the public were not involved in the  
39  
40 86 development of the research question and outcome measures of this study. The research  
41  
42 87 question was developed by authors (JLS and PABW). Patients were recruited if they were  
43  
44 88 undergoing a bronchoscopy as explained in "participants" section. The results will be  
45  
46 89 disseminated through publication and presentation at local, national and international research  
47  
48 90 meetings.  
49  
50

51  
52 91 **Participants:** Adults who were undergoing bronchoscopy either for medical purposes or were  
53  
54 92 undergoing a surgical procedure that involved endotracheal intubation and had spirometry  
55  
56 93 results, were recruited for this study from the outpatient clinic of John Hunter Hospital. The study  
57  
58  
59  
60

1  
2  
3 94 was approved by Hunter New England Human Research Ethics Committee (Reference No  
4  
5 95 05/08/10/3.09) and all participants provided written informed consent.  
6  
7

8 96 **Study design:** A cross sectional exploratory study was conducted in which BL samples were  
9  
10 97 obtained after an assessment of clinical history including respiratory symptoms, smoking status  
11  
12  
13 98 and medication. Spirometry and bronchoscopy were performed as outlined below.  
14  
15

16 99 **Study group:** Adults (>18 years) with no history of a clinical chest or upper respiratory tract  
17  
18 100 infection in the previous 6 weeks were studied. Healthy non-smokers (n=20) had normal lung  
19  
20 101 function assessed by spirometry, and had no previous history of respiratory disease. Adults with  
21  
22 102 asthma (n=39) had a physician's diagnosis of asthma with objective evidence of airflow  
23  
24 103 variability or bronchial hyperactivity on provocation challenge. Bronchiectasis (n=19) was  
25  
26 104 defined as evidence of a permanent dilation of airway segment on high resolution computed  
27  
28 105 tomography scan while those with COPD (n=20) had evidence of respiratory symptoms in  
29  
30 106 combination with a post bronchodilator FEV<sub>1</sub> of less than 80% of predicted value and/or a post  
31  
32 107 bronchodilator FEV<sub>1</sub>/FVC less than 70%. Current smokers were excluded. Since this was an  
33  
34 108 exploratory study in a completely new setting, the number of participants in each group were  
35  
36 109 decided on the basis of previous exploratory studies in this area<sup>18 19 21</sup>.  
37  
38  
39  
40  
41

42 110 **Spirometry:** Spirometry was performed (Easy One Spirometer, ndd Medical Technologies,  
43  
44 111 Massachusetts, USA) at John Hunter Hospital. Variable obstruction defined as a post  
45  
46 112 bronchodilator change in FEV<sub>1</sub> of 12% or 200mL after 400 mcg of salbutamol and the bronchial  
47  
48 113 hyper-responsiveness defined as at least 15% decline in FEV<sub>1</sub> after inducing bronchial  
49  
50 114 provocation with 4.5% saline solution.  
51  
52  
53

54 115 **Bronchoscopy:** Flexible bronchoscopy was performed at John Hunter Hospital, bronchial wash  
55  
56 116 was taken by wedging the bronchoscope into the right middle lobe and washing with 40 mL of  
57  
58  
59  
60

1  
2  
3 117 sterile saline solution. A fraction of BL was sent for microbial detection while the rest was  
4  
5 118 processed as described below.  
6  
7

8 119 **BL processing:** BL was filtered and total cell count (TCC) and viability was assessed by using  
9  
10 120 trypan blue exclusion method, within one hour of collection at Hunter Medical Research  
11  
12 121 Institute. The BL was centrifuged and the cell pellet was re-suspended in PBS to the  
13  
14 122 concentration of  $1 \times 10^6/\text{mL}$  and cellular cytopspins were prepared. The cytopspins were stained  
15  
16 123 with May-Grünwald Giemsa (Beckman Coulter, Brea, CA, USA) and a differential cell count of  
17  
18 124 400 non squamous cells was performed.  
19  
20  
21  
22

23 125 **Neutrophil subtype assessment:** Stained cytopspins were examined under oil immersion and 100  
24  
25 126 neutrophils were enumerated into banded, normal and hypersegmented neutrophils. Banded  
26  
27 127 neutrophils had a single banded lobe without any visible division; normal neutrophils had two to  
28  
29 128 four lobes with every lobe having a properly visible outer boundary; and hypersegmented  
30  
31 129 neutrophils had more than four lobes with every lobe having a properly visible outer boundary  
32  
33 130 as shown in Figure 1.  
34  
35  
36

37 131 **Statistical Analysis:** Data were analysed using Stata software version 11 (StataCorp, College  
38  
39 132 Station, TX, USA). Results are reported as mean (SD) or median (interquartile range), unless  
40  
41 133 otherwise stated. Continuous measures were analysed using the two-sample Wilcoxon's rank  
42  
43 134 sum test or t-test and Kruskal-Wallis test or one way analysis of variance (ANOVA) as  
44  
45 135 appropriate. Categorical data were analysed using Fisher's exact test. Spearman correlation  
46  
47 136 coefficients were calculated for the association between neutrophil subsets and clinical  
48  
49 137 characteristics.  
50  
51  
52  
53

54 138

## 57 139 **RESULTS**

### 60 140 **Clinical characteristics**

1  
2  
3 141 Participants with COPD were more likely to be ex-smoking males with more severe airflow  
4  
5 142 obstruction (Table 1). Fewer participants with COPD were prescribed ICS compared with the  
6  
7  
8 143 asthma group, however, the mean daily dose of ICS was significantly higher in COPD  
9  
10 144 participants. The number of participants with severe asthma were higher than the number with  
11  
12 145 severe COPD (Table 1) according to GINA<sup>22</sup> and GOLD<sup>23</sup> severity classification, respectively.  
13  
14  
15 146 Bronchiectasis participants were generally of mild severity according to their bronchiectasis  
16  
17 147 severity index<sup>24</sup> (Table 1). The causes of bronchiectasis is mainly idiopathic and post-infection  
18  
19 148 (Table S1, supplementary data).

### 22 149 **Inflammatory cell counts**

23  
24  
25 150 BL inflammatory cell counts for the participants are detailed in Table 2. Participants with  
26  
27 151 bronchiectasis and COPD had an increased TCC (Table 2). The proportion and number of  
28  
29  
30 152 neutrophils was significantly higher in the bronchiectasis and COPD group compared with  
31  
32 153 healthy controls, while the proportion of neutrophils in asthma were significantly lower in  
33  
34 154 comparison with COPD. The asthma group also had a significantly lower number of  
35  
36  
37 155 neutrophils in comparison with bronchiectasis and COPD. The proportion of eosinophils was  
38  
39 156 significantly higher in COPD and asthma compared with healthy controls, while the number of  
40  
41 157 eosinophils was significantly higher in all three obstructive airways diseases compared with  
42  
43  
44 158 healthy controls.

45  
46 159

### 49 160 **Neutrophil subsets**

50  
51  
52 161 All three neutrophil subsets were identified in the BL of all participants. The numbers of normal  
53  
54 162 neutrophils were significantly higher in bronchiectasis and COPD group in comparison to healthy  
55  
56 163 and asthma (Figure 2A). Numbers of banded neutrophils were highest in those participants with  
57  
58  
59 164 bronchiectasis compared with both healthy and asthma groups, while in COPD banded  
60

1  
2  
3 165 neutrophils numbers were higher in comparison with healthy participants only (Figure 2B).  
4

5 166 Hypersegmented neutrophil numbers were significantly increased in all the obstructive airway  
6  
7  
8 167 disease groups compared with healthy controls and increased in participants with COPD  
9  
10 168 compared with asthma and bronchiectasis (Figure 2C).  
11  
12

13 169 When considering the relative distribution of neutrophil subsets by proportion (shown in Figure  
14  
15 170 2 D-F), participants with COPD had a significantly reduced proportion of normal and banded  
16  
17  
18 171 neutrophils and subsequently a significantly increased proportion of hypersegmented  
19  
20 172 neutrophils.  
21  
22  
23  
24  
25  
26  
27  
28  
29  
30  
31  
32  
33  
34  
35  
36  
37  
38  
39  
40  
41  
42  
43  
44  
45  
46  
47  
48  
49  
50  
51  
52  
53  
54  
55  
56  
57  
58  
59  
60

Table 1: Clinical characteristics of participants with bronchiectasis, asthma, COPD, and healthy controls.

|                                                   | Bronchiectasis                | COPD                           | Asthma                                              | Healthy                              | p value |
|---------------------------------------------------|-------------------------------|--------------------------------|-----------------------------------------------------|--------------------------------------|---------|
| n                                                 | 19                            | 20                             | 39                                                  | 20                                   |         |
| Age                                               | 67.8 (7.1)                    | 68.8 (10.2)                    | 64.8 (7.3)                                          | 61.3 (9.7)                           | 0.024   |
| Males, n (%)                                      | 7 (36.8)                      | 14 (70.0)                      | 18 (46.2)                                           | 9 (45.0)                             | 0.184   |
| Ex-smoker, n (%)                                  | 0 (0.0)                       | 20 (100.0) <sup>^</sup> $\phi$ | 15 (38.5) <sup><math>\phi</math></sup> <sup>#</sup> | 2 (10.0)                             | <0.001  |
| Smoking (pack years)                              | --                            | 35.0 (20.0-55.0)               | 10.0 (4.0-30.0) <sup>#</sup>                        | (5.0,5.0)                            | 0.007   |
| FEV <sub>1</sub> % predicted                      | 91.9 (18.3) <sup>#</sup>      | 57.4 (16.9) <sup>^</sup>       | 72.3 (20.1) <sup>^</sup> $\phi$                     | 98.6 (12.1), n=19                    | <0.001  |
| FEV <sub>1</sub> /FVC (%)                         | 73.0 (67.0-78.0) <sup>#</sup> | 59.5 (39.0- 65.0)              | 66.0 (59.0-72.0) <sup>^</sup> <sup>#</sup>          | 75.0 (72.0-80.0) <sup>#</sup> , n=19 | <0.001  |
| Taking ICS, n (%)                                 | 0 (0.0)                       | 8 (40.0)                       | 37 (94.9) <sup>#</sup>                              | 0 (0.0)                              | <0.001  |
| BDP equivalent ICS dose $\mu$ g day <sup>-1</sup> | --                            | 1700.00 (555.49)               | 978.37 (398.70) <sup>#</sup>                        | --                                   | <0.001  |
| Bacterial pathogen, n (%)                         | 8 (42.1) <sup>^</sup>         | 8 (40.0) <sup>^</sup>          | 12 (30.8) <sup>^</sup>                              | 0 (0)                                | 0.003   |
| Bronchiectasis severity index                     | 4 (2.0-7.0), n=18             | --                             | --                                                  | --                                   | --      |
| GINA stages of asthma severity, n (%)             |                               |                                |                                                     |                                      |         |
| Intermittent                                      |                               |                                | 1 (2.6)                                             |                                      |         |
| Mild persistent                                   |                               |                                | 6 (15.8)                                            |                                      |         |
| Moderate persistent                               |                               |                                | 9 (23.7)                                            |                                      |         |

|                                     |  |           |           |  |  |
|-------------------------------------|--|-----------|-----------|--|--|
| Severe persistent                   |  |           | 22 (56.4) |  |  |
| GOLD stages of COPD severity, n (%) |  |           |           |  |  |
| GOLD stage 1 (mild)                 |  | 2 (10.0)  |           |  |  |
| GOLD stage 2 (moderate)             |  | 11 (55.0) |           |  |  |
| GOLD stage 3 (severe)               |  | 6 (30.0)  |           |  |  |
| GOLD stage 4 (very severe)          |  | 1 (5.0)   |           |  |  |

Data are presented as mean ± SD or median (interquartile range; q1- q3) unless otherwise stated. FEV<sub>1</sub>: force expiratory volume in 1s; FVC: Forced vital capacity; ICS: Inhaled corticosteroids; BDP equivalent: ICS dose is calculated as beclomethasone dipropionate equivalent, where 1µg of beclomethasone = 1µg budesonide = 0.5µg fluticasone. ^p<0.0125 compared with healthy controls, φ p<0.0125 compared with bronchiectasis and # p<0.0125 compared with COPD.

Table 2: Inflammatory cell count of participants with bronchiectasis, asthma, COPD, and healthy controls.

|                                                 | Bronchiectasis                   | COPD                              | Asthma                           | Healthy             | p value* |
|-------------------------------------------------|----------------------------------|-----------------------------------|----------------------------------|---------------------|----------|
| Total cells x 10 <sup>6</sup> / mL              | 0.62 (0.19-1.74) <sup>^</sup>    | 0.83 (0.16-1.88) <sup>^</sup>     | 0.16 (0.09-0.34) <sup># φ</sup>  | 0.08 (0.05- 0.21)   | <0.001   |
| Viability, %                                    | 82.26 (75.00-91.67) <sup>^</sup> | 87.75 (73.60-92.95) <sup>^</sup>  | 77.78 (62.30-88.00)              | 72.22 (50.00-75.00) | 0.005    |
| Neutrophils, %                                  | 67.50 (41.00-84.25) <sup>^</sup> | 77.25 (73.00-85.13) <sup>^</sup>  | 58.00 (24.50-72.50) <sup>#</sup> | 28.25 (14.75-63.50) | <0.001   |
| Neutrophils x 10 <sup>4</sup> /mL               | 43.20 (5.21-164.43) <sup>^</sup> | 60.35 (13.31-149.70) <sup>^</sup> | 8.24 (3.12-25.01) <sup>φ#</sup>  | 3.18 (1.51-5.03)    | <0.001   |
| Eosinophils, %                                  | 1.00 (0.50-6.50)                 | 3.75 (1.13-8.88) <sup>^</sup>     | 2.25 (1.00-11.75) <sup>^</sup>   | 1.00 (0.75-1.25)    | 0.016    |
| Eosinophils x 10 <sup>4</sup> /mL               | 0.75 (0.40-2.76) <sup>^</sup>    | 1.89 (1.03-4.03) <sup>^</sup>     | 0.63 (0.14-3.07) <sup>^</sup>    | 0.09 (0.05-0.23)    | <0.001   |
| Macrophages,%                                   | 18.75 (11.00-34.75)              | 15.50 (8.50-20.03) <sup>^</sup>   | 25.00 (9.25-39.25)               | 29.25 (17.00-63.12) | 0.025    |
| Macrophages x 10 <sup>4</sup> /mL               | 12.40 (5.94-24.42) <sup>^</sup>  | 9.66 (2.91-18.24)                 | 4.24 (2.00-7.77) <sup>φ</sup>    | 2.10 (1.42-6.43)    | 0.002    |
| Lymphocytes, %                                  | 0.75 (0.00-1.50)                 | 0.38 (0.00-1.25)                  | 0.50 (0.00-1.50)                 | 1.5 (0.25-5.13)     | 0.058    |
| Lymphocytes x 10 <sup>4</sup> cells/mL          | 0.30 (0.00-1.02)                 | 0.18 (0.00-0.89)                  | 0.09 (0.00-0.37)                 | 0.18 (0.05-0.42)    | 0.459    |
| Columnar epithelial cells, %                    | 1.75 (0.75-10.50)                | 0.25 (0.00-2.50) <sup>^</sup>     | 4.50 (1.50-10.75) <sup>#</sup>   | 9.50 (4.88-23.63)   | <0.001   |
| Columnar epithelial cells x 10 <sup>4</sup> /mL | 1.99 (0.48-2.67) <sup>#</sup>    | 0.28 (0.00-0.59) <sup>^</sup>     | 1.00 (0.35-1.98) <sup>#</sup>    | 0.88 (0.38-2.38)    | <0.001   |

Data are presented as median (interquartile range; q1- q3) unless otherwise stated.

\* Kruskal-Wallis test, <sup>^</sup> p<0.0125 compared with healthy, <sup>φ</sup> p<0.0125 compared with bronchiectasis, and <sup>#</sup> p<0.0125 compared with COPD.



1  
2  
3 173 **Association of neutrophil subsets with clinical characteristics in obstructive airway**  
4  
5 174 **disease**

6  
7 175 There was a significant negative correlation between the proportion of hypersegmented  
8  
9 176 neutrophils with both FEV<sub>1</sub>% predicted (spearman's Rho -0.301, p=0.007) and FEV<sub>1</sub>/FVC% (Rho=  
10  
11 -0.322, p=0.004, Figure 3) in participants with obstructive airway disease (n=78). While the same  
12  
13 177 -0.322, p=0.004, Figure 3) in participants with obstructive airway disease (n=78). While the same  
14  
15 178 was not observed for banded neutrophils [FEV<sub>1</sub>% predicted (Rho= 0.181, p=0.114), FEV<sub>1</sub>/FVC%  
16  
17 179 (Rho= 0.213, p=0.061)] and normal neutrophils [FEV<sub>1</sub>% predicted (Rho= 0.189, p=0.097),  
18  
19 180 FEV<sub>1</sub>/FVC% (Rho= 0.213, p=0.062)]. There was no association between the total number of  
20  
21 181 hypersegmented neutrophils (x 10<sup>2</sup> cells/mL) with both FEV<sub>1</sub>% predicted (Rho= -0.152, p=0.185)  
22  
23 182 and FEV<sub>1</sub>/FVC% (Rho= -0.173, p=0.131). Similarly, no association was observed between total  
24  
25 183 neutrophil proportion and number with either FEV<sub>1</sub>% predicted [Rho= -0.143, p=0.212 and Rho=-  
26  
27 184 0.036, p=0.758, respectively] or with FEV<sub>1</sub>/FVC% [Rho= -0.142, p=0.214 and Rho=-0.043,  
28  
29 185 p=0.707, respectively].

30  
31  
32 186 In participants with COPD, the proportion of hypersegmented neutrophils was positively  
33  
34 187 associated with proportion of eosinophils (Rho=0.535, p=0.015) (Figure 4A) and negatively  
35  
36 188 associated with cell viability (Rho= -0.697, p<0.001) (Figure 4B). This association was not  
37  
38 189 observed in any other clinical group or in the overall population (data not shown).  
39  
40

41  
42 190  
43  
44 191 To explore the correlation between the proportions of eosinophils and hypersegmented  
45  
46 192 neutrophils further, we decided to examine the COPD participants according to their  
47  
48 193 inflammatory subtype categorised as eosinophilic COPD (E-COPD) ( $\geq 3\%$  eosinophils) and non-  
49  
50 194 eosinophilic COPD (NE-COPD) ( $< 3\%$  eosinophils).  
51  
52

53  
54 195

55  
56  
57 196 **Eosinophilic and non-eosinophilic COPD**  
58  
59  
60

1  
2  
3 197 Twelve participants were characterized as eosinophilic COPD (E-COPD) and eight participants  
4  
5 198 were characterized as non-eosinophilic COPD (NE-COPD). The NE-COPD group had a  
6  
7 199 significantly elevated total cell count [NE-COPD, 1.71 (1.47)  $\times 10^6/\text{mL}$ ; E-COPD, 0.67 (0.55)  
8  
9 200  $\times 10^6/\text{mL}$ ,  $p=0.037$ ] and cell viability [NE-COPD, 90.82 (5.80)% ; E-COPD, 76.67 (14.64)%,  
10  
11 201  $p=0.019$ ] along with a significantly elevated neutrophil proportion [NE-COPD, 85.50 (77.00-  
12  
13 202 92.38)%; E-COPD, 75.75 (69.88-77.75)% ,  $p=0.037$ ] and neutrophil number [NE-COPD, 148.37  
14  
15 203 (132.16)  $\times 10^4/\text{mL}$ ; E-COPD, 50.93 (42.95)  $\times 10^4/\text{mL}$ ,  $p=0.028$ ] in comparison with E-COPD.  
16  
17 204 The number and proportion of eosinophils were significantly higher in E-COPD i.e. [NE-COPD,  
18  
19 205 1.14 (1.05)  $\times 10^4/\text{mL}$ ; E-COPD, 4.71 (4.09)  $\times 10^4/\text{mL}$ ,  $p=0.040$ ] and [NE-COPD, 1.09 (0.57)%;  
20  
21 206 E-COPD, 9.08 (5.50)% ,  $p<0.001$ ], respectively. Besides this, no significant differences were  
22  
23 207 observed between these groups for any other clinical parameters.  
24  
25  
26  
27  
28  
29  
30  
31

208

### 209 **Neutrophil subsets in eosinophilic and non-eosinophilic COPD**

32  
33  
34  
35 210 The proportion of normal neutrophils were significantly reduced while the proportion of  
36  
37 211 hypersegmented neutrophils were elevated (Figure 5 A & C, respectively) in E-COPD compared  
38  
39 212 with NE-COPD. While no significant differences were observed for the number of any individual  
40  
41 213 subset (Figure 5 D-F) between E-COPD and NE-COPD.  
42  
43  
44  
45  
46  
47  
48  
49  
50  
51  
52

214

215

216

## 217 **DISCUSSION**

53  
54  
55 218 The study identified three morphologically distinct subsets of neutrophils i.e. banded, normal, and  
56  
57 219 hypersegmented in the BL of participants with chronic obstructive airways disease and healthy  
58  
59  
60

1  
2  
3 220 controls. There were a significantly higher number of hypersegmented neutrophils in those with  
4  
5 221 obstructive airway disease compared with healthy controls. The proportion of hypersegmented  
6  
7 222 neutrophils was associated with lower FEV<sub>1</sub> and more severe airflow obstruction (FEV<sub>1</sub>/FVC %) in  
8  
9  
10 223 obstructive airway disease participants and with the presence of eosinophilic airway inflammation  
11  
12 224 in COPD.

13  
14  
15 225 The concept of morphological heterogeneity in neutrophil population has recently emerged<sup>25</sup>. We  
16  
17 226 have examined neutrophil heterogeneity in the bronchial lavage of obstructive airway disease  
18  
19 227 participants and healthy controls. The reason for neutrophil heterogeneity is unclear but may be  
20  
21 228 attributable to the different stages of cell maturation in the bone marrow before transition to the  
22  
23 229 tissue, or alternatively, neutrophils might change their morphology during the course of  
24  
25 230 inflammation to adjust with the stressors in inflamed airways<sup>5 26</sup>.

26  
27  
28  
29  
30 231 Banded neutrophils are also known as immature neutrophils and are deemed incompetent in anti-  
31  
32 232 microbial immune functions as reported in the systemic circulation of sepsis patients<sup>27</sup>. The  
33  
34 233 emergence of banded neutrophils in the airway can occur after depletion of mature neutrophils in  
35  
36 234 bone marrow following excessive demand during acute inflammation<sup>20</sup>.

37  
38  
39  
40 235 The presence of hypersegmented neutrophils in airways could be an attribute of inflammation as the  
41  
42 236 hypersegmented neutrophils have also been reported in other inflammatory conditions such as  
43  
44 237 trauma<sup>18</sup> and in chronic inflammatory lung diseases such as ARDS<sup>19</sup>.

45  
46  
47 238 The hypersegmented morphology of the neutrophil implies increased maturation compared with  
48  
49 239 banded and normal neutrophils<sup>18</sup>. Maturation is thought to occur in inflamed airways due to the  
50  
51 240 presence of a cytokine rich environment consisting of pro-survival mediators<sup>28</sup>. The mechanism  
52  
53 241 behind formation of hypersegmented neutrophils are known to be linked with the life cycle of the  
54  
55 242 neutrophils. The increase in survival cause the nucleus of neutrophil to develop more indentation and  
56  
57 243 segmentation, and hence the hypersegmented neutrophils are also called as “old neutrophils”<sup>29</sup>.

1  
2  
3 244 The ability of a chemoattractant rich milieu to change the phenotype of neutrophils was recently  
4  
5 245 shown when neutrophils from the blood of healthy volunteers were incubated with the  
6  
7 246 broncoalveolar lavage from a patient with ARDS. These neutrophils altered their phenotype, with  
8  
9 247 an increase in those with a hypersegmented morphology<sup>19</sup>. It may be possible that a similar process  
10  
11 248 is occurring chronically in the airways of obstructive airway disease participants, who generally  
12  
13 249 have higher levels of pro-inflammatory cytokines and inflammatory mediators. Previous studies  
14  
15 250 have demonstrated that hypersegmented neutrophils in the circulation demonstrate low expression  
16  
17 251 of L-selectins, which may reduce their anchoring ability on endothelial cells and hence reduce their  
18  
19 252 chances to egress into inflamed airways<sup>30</sup>. Thus, it is possible that the hypersegmented neutrophils  
20  
21 253 we observed in our study have not directly come from circulation and instead may have become  
22  
23 254 hypersegmented in the airways under the influence of pro-survival mediators.

24  
25  
26  
27  
28  
29 255 Mediators that promote neutrophil survival and can be present in the airways include; GM-CSF,  
30  
31 256 chemokines like CXCL-8 and lipid mediators such as serum amyloid A<sup>26</sup>. GM-CSF and CXCL-8  
32  
33 257 are known to enhance neutrophil survival by promoting the expression of anti-apoptotic proteins like  
34  
35 258 survivins and by preventing TNF- $\alpha$  mediated apoptosis<sup>31 32</sup>. While serum amyloid A is known to  
36  
37 259 prolong neutrophil longevity by preventing mitochondrial damage and decreasing caspase-3  
38  
39 260 (apoptotic protein) activity<sup>33</sup>. Our past studies have reported elevated levels of CXCL-8 in sputum  
40  
41 261 samples of neutrophilic asthma, bronchiectasis<sup>34</sup>, and COPD patients<sup>35</sup>. Beside this, we have also  
42  
43 262 reported that elevated levels of serum amyloid A in COPD was associated with neutrophilic  
44  
45 263 inflammation in airways and this was refractory to corticosteroids<sup>36</sup>. This suggests that the elevated  
46  
47 264 presence of these markers might have played some role in enhancing the survival of neutrophils in  
48  
49 265 airways and promoting the presence of hypersegmented neutrophils.

50  
51  
52  
53  
54  
55 266 In this study, we also reported a positive correlation between eosinophils and hypersegmented  
56  
57 267 neutrophils proportion in COPD participants along with elevated proportion of hypersegmented  
58  
59 268 neutrophils in E-COPD participants. The presence of eosinophils in airways can further elevate the

1  
2  
3 269 level of GM-CSF due to their own production of this cytokine<sup>37</sup>, which can further promote  
4  
5 270 maturation of neutrophils. Beside this, the use of ICS to control eosinophilic inflammation may  
6  
7 271 enhance neutrophil survival in the inflamed airways by increasing the activity of anti-apoptotic  
8  
9 272 proteins such as Mcl-1 (induced myeloid leukaemia cell differentiation protein) and IAPs (inhibitor  
10  
11 273 of apoptosis proteins) in neutrophils<sup>38</sup>. This increased maturity and prevention of death may result in  
12  
13  
14 274 an increased proportion of hypersegmented neutrophils.

15  
16  
17 275 There is also a debate about whether all hypersegmented neutrophils have same functional  
18  
19 276 characteristics. Pillay *et al*<sup>18</sup> observed that hypersegmented neutrophils obtained after inducing  
20  
21 277 acute systemic inflammation were exhibiting immunosuppressive effect on T lymphocyte in an *in*  
22  
23 278 *vitro* co-culture. While in another study by Whitmore *et al*<sup>39</sup>, observed that neutrophils changed into  
24  
25 279 a hypersegmented phenotype following incubation with *H .Pylori*, which could then exhibit  
26  
27 280 cytotoxic activity on stomach epithelial cells. But interestingly in both these studies,  
28  
29 281 hypersegmented neutrophils exhibited their respective response by same mechanism i.e. by  
30  
31 282 administering high amount of ROS (reactive oxygen species) in respective cells, and also had similar  
32  
33 283 pattern of adhesion molecules expression on their surface.

34  
35  
36 284 The significant association between the proportion of hypersegmented neutrophils with FEV<sub>1</sub> and  
37  
38 285 severe airflow obstruction in our study suggests that where hypersegmented neutrophils are  
39  
40 286 common, airway obstruction is most severe. This could be a result of high oxidative burst produced  
41  
42 287 by hypersegmented neutrophils as observed in previous studies, in which hypersegmented  
43  
44 288 neutrophil exhibited high oxidative burst after ex-vivo stimulation<sup>18 19</sup>. The generation of high  
45  
46 289 oxidative burst by neutrophils may also impair their timely clearance from the airway<sup>40</sup> and can  
47  
48 290 trigger a vicious cycle of neutrophils influx into the airways<sup>6</sup>. The impairment of neutrophil  
49  
50 291 clearance in airway may cause necrosis of neutrophils which can spill its cytotoxic content such as  
51  
52 292 reactive oxygen species and proteolytic enzymes like neutrophil elastase in the lumen of airways<sup>41</sup>.  
53  
54 293 This can further damage airway wall and promote mucus hypersecretion which may result in

1  
2  
3 294 significant decline in FEV<sub>1</sub> as earlier reported in COPD<sup>42</sup>. Interestingly, we did not observe this  
4  
5 295 correlation with other neutrophil subsets or with total neutrophil proportion or number. Further  
6  
7  
8 296 research is needed to understand if hypersegmented neutrophils are common as a result of more  
9  
10 297 severe disease or conversely if they influence disease severity.

11  
12  
13 298 The cross-sectional nature of study is a limitation in properly establishing the cause and effect of  
14  
15 299 relationship of neutrophil heterogeneity in airways. Besides that, small sample sizes is another  
16  
17 300 limitation of this study. Hence, further confirmatory studies are needed with large sample sizes to  
18  
19 301 validate the finding of this study. Additionally, a detailed ex-vivo study of influence of pathogen,  
20  
21 302 pro-survival mediators, and current medications like ICS on neutrophil subsets morphology, surface  
22  
23 303 expressions, and functional behaviour is also needed to provide a better understanding of the  
24  
25 304 formation of hypersegmented neutrophils in the airways and subsequently in developing a more  
26  
27 305 comprehensive strategy for assessment and management of airway neutrophilia.

## 31 306 **CONCLUSION**

32  
33  
34  
35 307 We have shown the presence of three morphologically different subsets of neutrophils in the airways  
36  
37 308 of healthy and obstructive airway disease participants i.e. asthma, COPD, and bronchiectasis. The  
38  
39 309 increased proportion of hypersegmented neutrophils in the airways of obstructive airway disease  
40  
41 310 participants was associated with reduced lung function of these participants. The proportion of  
42  
43 311 hypersegmented neutrophils was highest in COPD participants in comparison with all other groups.

44  
45  
46  
47 312

## 48 313 **ACKNOWLEDGEMENTS**

49  
50  
51  
52  
53 314 We acknowledge technical support from Andrew Reid, Michelle Gleeson, Kellie Fakes and  
54  
55 315 Bridgette Donati and clinical support from Lorissa Hopkins and Douglas Dorahy of The Priority  
56  
57 316 Research Centre for Healthy Lungs.

1  
2  
3 317  
4  
5

6 318 **CONTRIBUTORS:** JLS developed the idea and designed the study. JLS also supervised and  
7  
8 319 coordinated the study throughout. RL performed the subtype counting and wrote the manuscript  
9  
10 320 which was further refined and edited by JLS, PABW, KB and DB. PABW performed the  
11  
12 321 bronchoscopy, KB supervised the bronchial lavage processing and cytospin preparation and DB  
13  
14  
15 322 supervised the statistical analysis.  
16  
17  
18  
19  
20  
21  
22  
23  
24  
25  
26  
27  
28  
29  
30  
31  
32  
33  
34  
35  
36  
37  
38  
39  
40  
41  
42  
43  
44  
45  
46  
47  
48  
49  
50  
51  
52  
53  
54  
55  
56  
57  
58  
59  
60

For peer review only

1  
2  
3  
4  
5  
6 **COMPETING INTERESTS:** None.  
7  
8  
9

10  
11  
12 **FUNDING:** This research received no specific grant from any funding agency in the public,  
13 commercial or not for profit sector.  
14  
15  
16

17  
18  
19  
20 **DATA SHARING STATEMENT:** Raw data can be obtained by contacting the corresponding  
21 author.  
22  
23  
24

## 25 26 27 28 29 **REFERENCES**

- 30  
31 1. Wright HL, Moots RJ, Bucknall RC, et al. Neutrophil function in inflammation and inflammatory  
32 diseases. *Rheumatology (Oxford)* 2010;49(9):1618-31.
- 33 2. Amulic B, Cazalet C, Hayes GL, et al. Neutrophil function: from mechanisms to disease. *Annu Rev*  
34 *Immunol* 2012;30:459-89.
- 35 3. Zuo L, Lucas K, Fortuna CA, et al. Molecular Regulation of Toll-like Receptors in Asthma and COPD.  
36 *Front Physiol* 2015;6:312.
- 37 4. Konrad FM, Reutershan J. CXCR2 in acute lung injury. *Mediators Inflamm* 2012;2012:740987.
- 38 5. Bruijnzeel PL, Uddin M, Koenderman L. Targeting neutrophilic inflammation in severe neutrophilic  
39 asthma: can we target the disease-relevant neutrophil phenotype? *J Leukoc Biol*  
40 2015;98(4):549-56.
- 41 6. Simpson JL, Phipps S, Gibson PG. Inflammatory mechanisms and treatment of obstructive airway  
42 diseases with neutrophilic bronchitis. *Pharmacol Ther* 2009;124(1):86-95.
- 43 7. Essilfie AT, Simpson JL, Dunkley ML, et al. Combined Haemophilus influenzae respiratory infection  
44 and allergic airways disease drives chronic infection and features of neutrophilic asthma. *Thorax*  
45 2012;67(7):588-99.
- 46 8. Kirsty H, Rahul S, Richard R, et al. Defining Inflammatory Groups Within a COPD Cohort. B43 COPD:  
47 PHENOTYPES AND CLINICAL OUTCOMES: American Thoracic Society 2016:A3514-A14.
- 48 9. McDonald VM, Higgins I, Wood LG, et al. Multidimensional assessment and tailored interventions for  
49 COPD: respiratory utopia or common sense? *Thorax* 2013;68(7):691-4.
- 50 10. Dente FL, Bilotta M, Bartoli ML, et al. Neutrophilic Bronchial Inflammation Correlates with Clinical  
51 and Functional Findings in Patients with Noncystic Fibrosis Bronchiectasis. *Mediat Inflamm*  
52 2015;2015:642503.
- 53 11. Reddel HK, Bateman ED, Becker A, et al. A summary of the new GINA strategy: a roadmap to asthma  
54 control. *Eur Respir J* 2015;46(3):622-39.  
55  
56  
57  
58  
59  
60



12. Bathoorn E, Kerstjens H, Postma D, et al. Airways inflammation and treatment during acute exacerbations of COPD. *International Journal of Chronic Obstructive Pulmonary Disease* 2008;3(2):217-29.
13. Chang AB, Bell SC, Byrnes CA, et al. Chronic suppurative lung disease and bronchiectasis in children and adults in Australia and New Zealand. *Med J Aust* 2010;193(6):356-65.
14. Simpson JL, Scott R, Boyle MJ, et al. Inflammatory subtypes in asthma: assessment and identification using induced sputum. *Respirology* 2006;11(1):54-61.
15. Beeh KM, Beier J. Handle with care: targeting neutrophils in chronic obstructive pulmonary disease and severe asthma? *Clin Exp Allergy* 2006;36(2):142-57.
16. Mardh CK, Root J, Uddin M, et al. Targets of Neutrophil Influx and Weaponry: Therapeutic Opportunities for Chronic Obstructive Airway Disease. *J Immunol Res* 2017;2017:5273201.
17. Shaw DE, Berry MA, Hargadon B, et al. Association between neutrophilic airway inflammation and airflow limitation in adults with asthma. *Chest* 2007;132(6):1871-5.
18. Pillay J, Kamp VM, van Hoffen E, et al. A subset of neutrophils in human systemic inflammation inhibits T cell responses through Mac-1. *J Clin Invest* 2012;122(1):327-36.
19. Juss JK, House D, Amour A, et al. Acute Respiratory Distress Syndrome Neutrophils Have a Distinct Phenotype and Are Resistant to Phosphoinositide 3-Kinase Inhibition. *Am J Respir Crit Care Med* 2016;194(8):961-73.
20. Cortjens B, Ingelse SA, Calis JC, et al. Neutrophil subset responses in infants with severe viral respiratory infection. *Clin Immunol* 2017;176:100-06.
21. Tak T, Wijten P, Heeres M, et al. Human CD62L(dim) neutrophils identified as a separate subset by proteome profiling and in vivo pulse-chase labeling. *Blood* 2017;129(26):3476-85.
22. Koshak EA. Classification of asthma according to revised 2006 GINA: Evolution from severity to control. *Annals of Thoracic Medicine* 2007;2(2):45-46.
23. Yusef RD. Evolution of the GOLD Documents for the Diagnosis, Management, and Prevention of Chronic Obstructive Pulmonary Disease. Controversies and Questions. *American Journal of Respiratory and Critical Care Medicine* 2013;188(1):4-5.
24. Chalmers JD, Goeminne P, Aliberti S, et al. The bronchiectasis severity index. An international derivation and validation study. *Am J Respir Crit Care Med* 2014;189(5):576-85.
25. Silvestre-Roig C, Hidalgo A, Soehnlein O. Neutrophil heterogeneity: implications for homeostasis and pathogenesis. *Blood* 2016;127(18):2173-81.
26. Kolaczowska E, Kubes P. Neutrophil recruitment and function in health and inflammation. *Nat Rev Immunol* 2013;13(3):159-75.
27. Taneja R, Sharma AP, Hallett MB, et al. Immature circulating neutrophils in sepsis have impaired phagocytosis and calcium signaling. *Shock* 2008;30(6):618-22.
28. Uddin M, Nong G, Ward J, et al. Prosurvival activity for airway neutrophils in severe asthma. *Thorax* 2010;65(8):684-9.
29. Pillay J, Tak T, Kamp VM, et al. Immune suppression by neutrophils and granulocytic myeloid-derived suppressor cells: similarities and differences. *Cell Mol Life Sci* 2013;70(20):3813-27.
30. Kamp VM, Pillay J, Lammers JW, et al. Human suppressive neutrophils CD16bright/CD62Ldim exhibit decreased adhesion. *Journal of leukocyte biology* 2012;92(5):1011-20.
31. Gabelloni ML, Trevani AS, Sabatté J, et al. Mechanisms regulating neutrophil survival and cell death. *Seminars in Immunopathology* 2013;35(4):423-37.
32. Kettritz R, Gaido ML, Haller H, et al. Interleukin-8 delays spontaneous and tumor necrosis factor-alpha-mediated apoptosis of human neutrophils. *Kidney Int* 1998;53(1):84-91.
33. Kebir DE, Jozsef L, Khreiss T, et al. Serum amyloid A (SAA) prevents mitochondrial dysfunction and delays constitutive neutrophil apoptosis. *The FASEB Journal* 2007;21(5):A13.
34. Simpson JL, Grissell TV, Douwes J, et al. Innate immune activation in neutrophilic asthma and bronchiectasis. *Thorax* 2007;62(3):211-8.
35. Baines KJ, Simpson JL, Gibson PG. Innate Immune Responses Are Increased in Chronic Obstructive Pulmonary Disease. *PLoS ONE* 2011;6(3):e18426.

- 1  
2  
3  
4  
5  
6  
7  
8  
9  
10  
11  
12  
13  
14  
15  
16  
17  
18  
19  
20  
21  
22  
23  
24  
25  
26  
27  
28  
29  
30  
31  
32  
33  
34  
35  
36  
37  
38  
39  
40  
41  
42  
43  
44  
45  
46  
47  
48  
49  
50  
51  
52  
53  
54  
55  
56  
57  
58  
59  
60
36. Bozinovski S, Uddin M, Vlahos R, et al. Serum amyloid A opposes lipoxin A(4) to mediate glucocorticoid refractory lung inflammation in chronic obstructive pulmonary disease. *Proc Natl Acad Sci U S A* 2012;109(3):935-40.
  37. Esnault S, Malter JS. GM-CSF regulation in eosinophils. *Arch Immunol Ther Exp (Warsz)* 2002;50(2):121-30.
  38. Saffar AS, Ashdown H, Gounni AS. The Molecular Mechanisms of Glucocorticoids-Mediated Neutrophil Survival. *Current Drug Targets* 2011;12(4):556-62.
  39. Whitmore LC, Weems MN, Allen LH. Cutting Edge: Helicobacter pylori Induces Nuclear Hypersegmentation and Subtype Differentiation of Human Neutrophils In Vitro. *J Immunol* 2017;198(5):1793-97.
  40. Simpson JL, Gibson PG, Yang IA, et al. Impaired macrophage phagocytosis in non-eosinophilic asthma. *Clin Exp Allergy* 2013;43(1):29-35.
  41. Kim S, Nadel JA. Role of neutrophils in mucus hypersecretion in COPD and implications for therapy. *Treat Respir Med* 2004;3(3):147-59.
  42. Vestbo J, Prescott E, Lange P. Association of chronic mucus hypersecretion with FEV1 decline and chronic obstructive pulmonary disease morbidity. Copenhagen City Heart Study Group. *Am J Respir Crit Care Med* 1996;153(5):1530-5.

**FIGURES LEGENDS:**

**Figure 1:** Subsets of neutrophils characterized as per number of lobes in their nucleus. (A) A representative pictomicrograph of BL cytospin of obstructive airway disease participants (X 100 original magnification, MGG stain) consist of (B) Banded neutrophil, (c) Normal neutrophil, and (D) Hypersegmented neutrophil.

**Figure 2:** Neutrophil subset number (A-C) and neutrophil subset proportion (D-F) in BL of participants with bronchiectasis, COPD, asthma, and healthy controls. The line in dot plots of each group represents the median.  $\wedge p < 0.0125$  compared with healthy controls, \*  $p < 0.0125$  compared with asthma and #  $p < 0.0125$  compared with COPD, as per Kruskal-Wallis test.

**Figure 3:** Scatterplot of hypersegmented neutrophil proportion vs FEV<sub>1</sub>% predicted (A) and FEV<sub>1</sub>/FVC (B) in BL of obstructive airway disease participant's.

**Figure 4:** (A) Scatterplot of hypersegmented neutrophils proportion vs eosinophils proportion, (B) viability of total cells in BL of COPD participants.

**Figure 5:** Neutrophil subsets proportion (A-C) and neutrophil subsets number (D-F) in bronchial lavage of eosinophilic (E-COPD) and non-eosinophilic COPD (NE-COPD) participants. The line in dot plots of each group represents the median and the p value in each graph is an outcome of Wilcoxon rank-sum test.

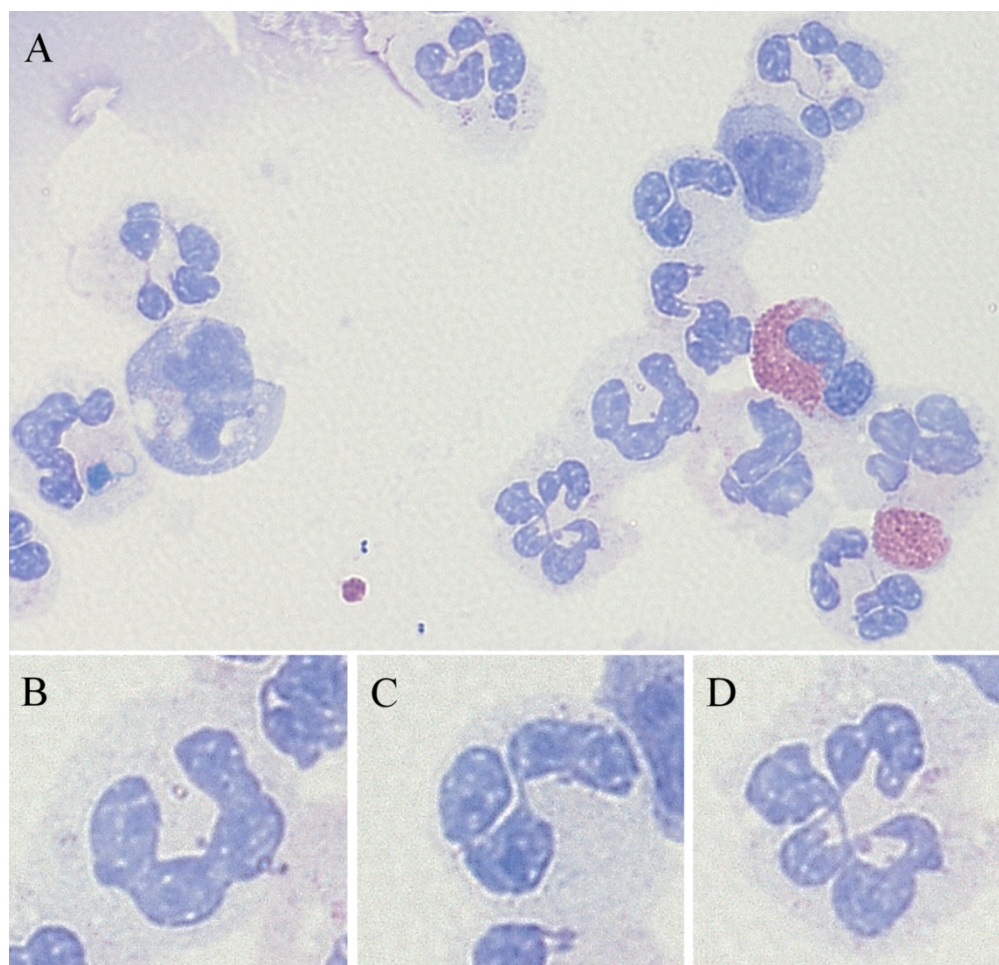

Figure 1: Subtypes of neutrophils characterized as per number of lobes in their nucleus. (A) A representative pictomicrograph of BL cytospin of obstructive airway disease participants( X 100 original magnification, MGG stain) consist of (B) Banded neutrophil, (c) Normal neutrophil, and (D) Hypersegmented neutrophil.

153x146mm (300 x 300 DPI)

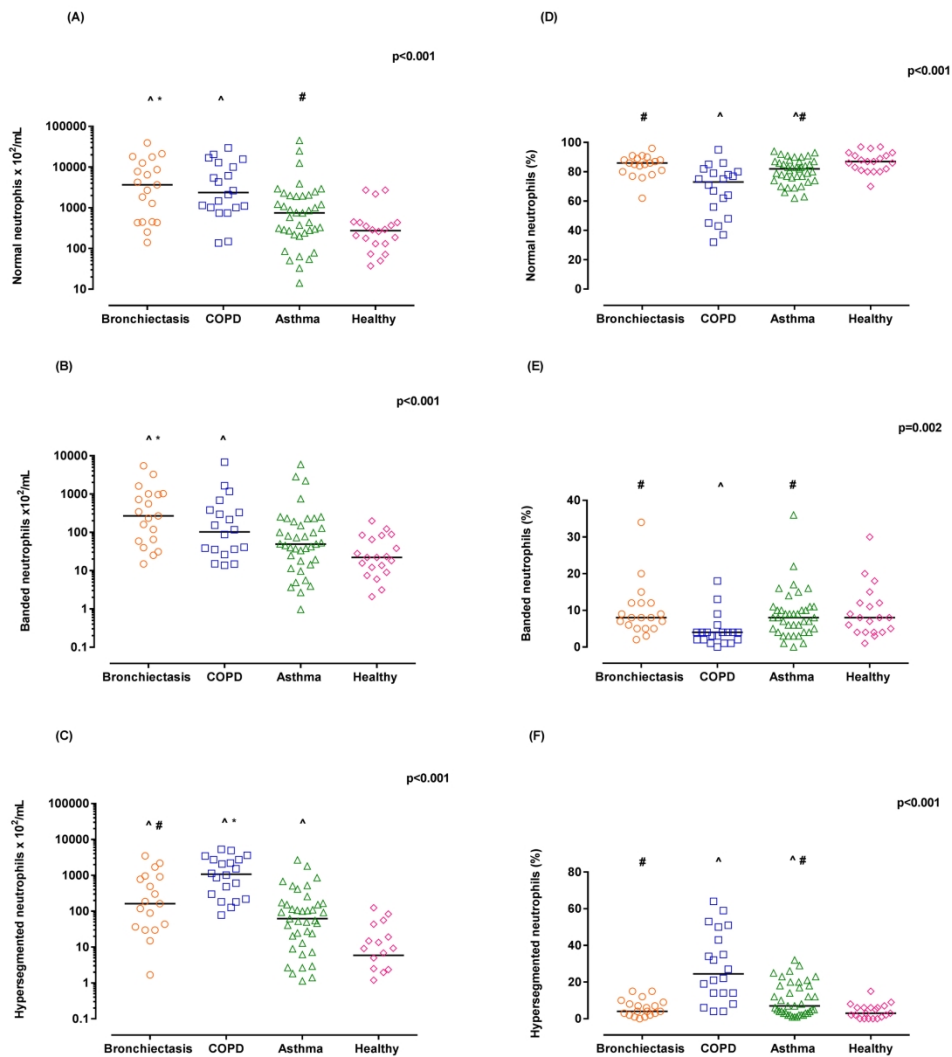

Figure 2: Neutrophil subset number (A-C) and neutrophil subset proportion (D-F) in BL of participants with bronchiectasis, COPD, asthma, and healthy controls. The line in dot plots of each group represents the median. ^p<0.0125 compared with healthy controls, \* p<0.0125 compared with asthma and # p<0.0125 compared with COPD, as per Kruskal-Wallis test.

217x237mm (300 x 300 DPI)

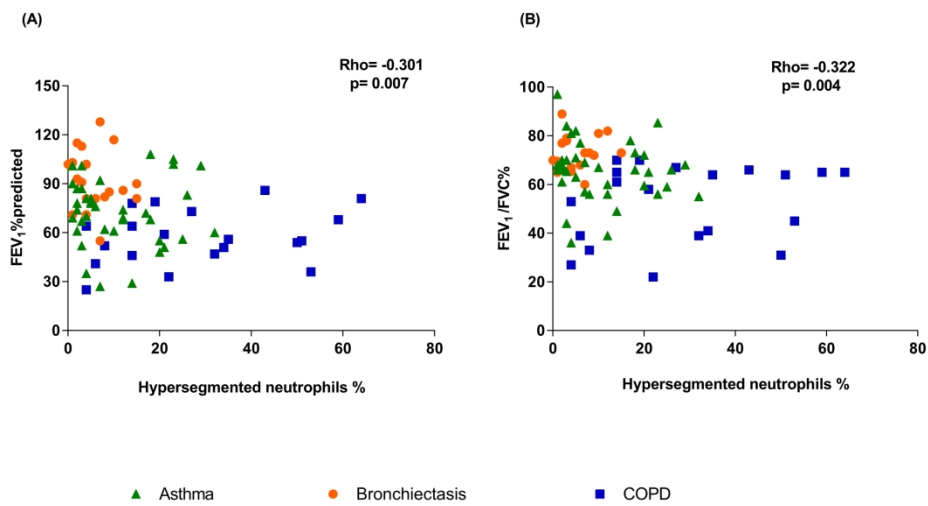

Figure 3: Scatterplot of hypersegmented neutrophil proportion vs FEV<sub>1</sub>% predicted (A) and FEV<sub>1</sub>/FVC (B) in BL of obstructive airway disease participant's.

248x134mm (300 x 300 DPI)

1  
2  
3  
4  
5  
6  
7  
8  
9  
10  
11  
12  
13  
14  
15  
16  
17  
18  
19  
20  
21  
22  
23  
24  
25  
26  
27  
28  
29  
30  
31  
32  
33  
34  
35  
36  
37  
38  
39  
40  
41  
42  
43  
44  
45  
46  
47  
48  
49  
50  
51  
52  
53  
54  
55  
56  
57  
58  
59  
60

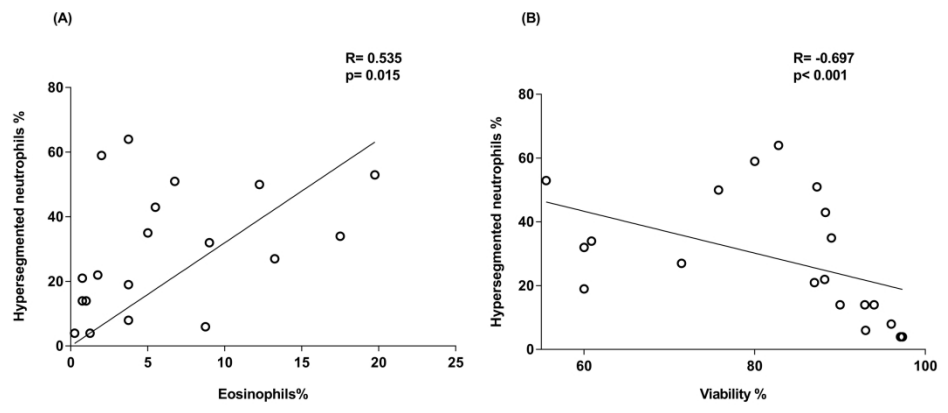

Figure 4: (A) Scatterplot of hypersegmented neutrophils proportion vs eosinophils proportion, (B) viability of total cells in BL of COPD participants.

268x134mm (300 x 300 DPI)

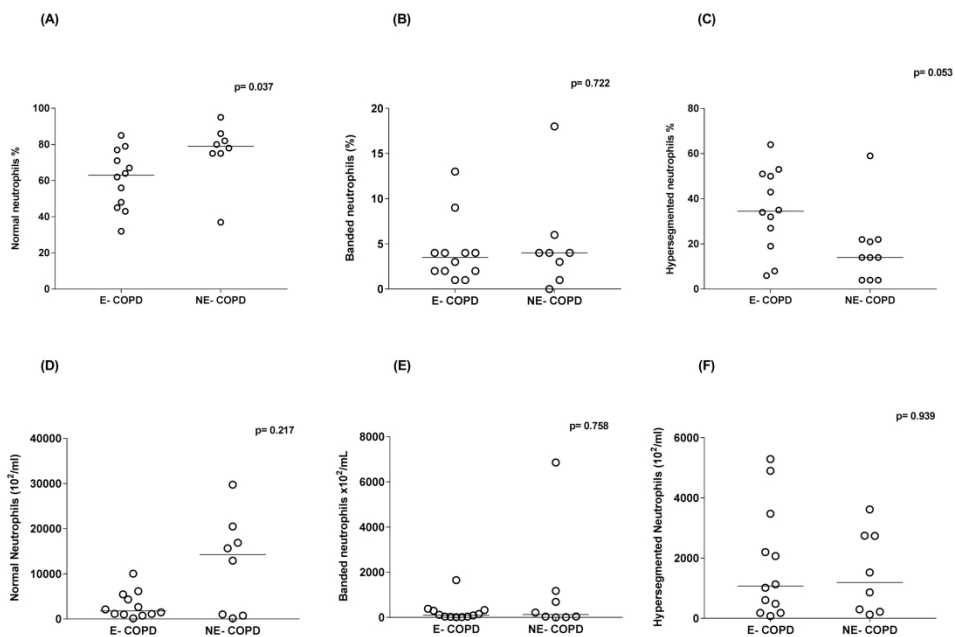

Figure 5: Neutrophil subsets proportion (A-C) and neutrophil subsets number (D-F) in bronchial lavage of eosinophilic (E-COPD) and non-eosinophilic COPD (NE-COPD) participants. The line in dot plots of each group represents the median and the p value in each graph is an outcome of Wilcoxon rank-sum test.

280x185mm (300 x 300 DPI)



**Supplementary data:***Table S1: Possible causes of bronchiectasis in bronchiectasis group (n=18).*

| <b>Causes of Bronchiectasis</b> | <b>Number of participants (n), (%)</b> |
|---------------------------------|----------------------------------------|
| Idiopathic                      | 10 (55.55)                             |
| Post-infection                  | 6 (33.33)                              |
| Immune deficient                | 1 (5.56)                               |
| Ciliary dyskinesia              | 0 (0)                                  |
| COPD                            | 0 (0)                                  |
| Asthma                          | 0 (0)                                  |
| Others                          | 1 (5.56)                               |

# Reporting checklist for cross sectional study.

Based on the STROBE cross sectional guidelines.

## Instructions to authors

Complete this checklist by entering the page numbers from your manuscript where readers will find each of the items listed below.

Your article may not currently address all the items on the checklist. Please modify your text to include the missing information. If you are certain that an item does not apply, please write "n/a" and provide a short explanation.

Upload your completed checklist as an extra file when you submit to a journal.

In your methods section, say that you used the STROBE cross sectional reporting guidelines, and cite them as:

von Elm E, Altman DG, Egger M, Pocock SJ, Gøtzsche PC, Vandenbroucke JP. The Strengthening the Reporting of Observational Studies in Epidemiology (STROBE) Statement: guidelines for reporting observational studies.

|                        |                     | Reporting Item                                                                                                                           | Page Number |
|------------------------|---------------------|------------------------------------------------------------------------------------------------------------------------------------------|-------------|
| Title                  | <a href="#">#1a</a> | Indicate the study's design with a commonly used term in the title or the abstract                                                       | 3           |
| Abstract               | <a href="#">#1b</a> | Provide in the abstract an informative and balanced summary of what was done and what was found                                          | 3           |
| Background / rationale | <a href="#">#2</a>  | Explain the scientific background and rationale for the investigation being reported                                                     | 5           |
| Objectives             | <a href="#">#3</a>  | State specific objectives, including any prespecified hypotheses                                                                         | 6           |
| Study design           | <a href="#">#4</a>  | Present key elements of study design early in the paper                                                                                  | 6           |
| Setting                | <a href="#">#5</a>  | Describe the setting, locations, and relevant dates, including periods of recruitment, exposure, follow-up, and data collection          | 6-7         |
| Eligibility criteria   | <a href="#">#6a</a> | Give the eligibility criteria, and the sources and methods of selection of participants.                                                 | 6-7         |
|                        | <a href="#">#7</a>  | Clearly define all outcomes, exposures, predictors, potential confounders, and effect modifiers. Give diagnostic criteria, if applicable | 6-7         |

|    |                |                      |                                                                   |                                              |
|----|----------------|----------------------|-------------------------------------------------------------------|----------------------------------------------|
| 1  | Data sources / | <a href="#">#8</a>   | For each variable of interest give sources of data and details of | 6-7                                          |
| 2  | measurement    |                      | methods of assessment (measurement). Describe                     |                                              |
| 3  |                |                      | comparability of assessment methods if there is more than one     |                                              |
| 4  |                |                      | group. Give information separately for for exposed and            |                                              |
| 5  |                |                      | unexposed groups if applicable.                                   |                                              |
| 6  |                |                      |                                                                   |                                              |
| 7  |                |                      |                                                                   |                                              |
| 8  |                |                      |                                                                   |                                              |
| 9  | Bias           | <a href="#">#9</a>   | Describe any efforts to address potential sources of bias         | 6-7, study utilized standard guidelines to   |
| 10 |                |                      |                                                                   | formulate exclusion and inclusion criteria   |
| 11 |                |                      |                                                                   | for every group to limit the selection bias. |
| 12 |                |                      |                                                                   |                                              |
| 13 |                |                      |                                                                   |                                              |
| 14 |                |                      |                                                                   |                                              |
| 15 | Study size     | <a href="#">#10</a>  | Explain how the study size was arrived at                         | 6, (described in study group section")       |
| 16 |                |                      |                                                                   |                                              |
| 17 | Quantitative   | <a href="#">#11</a>  | Explain how quantitative variables were handled in the            | 8                                            |
| 18 | variables      |                      | analyses. If applicable, describe which groupings were chosen,    |                                              |
| 19 |                |                      | and why                                                           |                                              |
| 20 |                |                      |                                                                   |                                              |
| 21 |                |                      |                                                                   |                                              |
| 22 | Statistical    | <a href="#">#12a</a> | Describe all statistical methods, including those used to         | 8                                            |
| 23 | methods        |                      | control for confounding                                           |                                              |
| 24 |                |                      |                                                                   |                                              |
| 25 |                |                      |                                                                   |                                              |
| 26 |                | <a href="#">#12b</a> | Describe any methods used to examine subgroups and                | n/a...we examined COPD subgroups             |
| 27 |                |                      | interactions                                                      | (Eosinophilic and Non-Eosinophilic)          |
| 28 |                |                      |                                                                   | based on pre-defined cut off values on       |
| 29 |                |                      |                                                                   | page 12-14.                                  |
| 30 |                |                      |                                                                   |                                              |
| 31 |                |                      |                                                                   |                                              |
| 32 |                |                      |                                                                   |                                              |
| 33 |                | <a href="#">#12c</a> | Explain how missing data were addressed                           | Missing data were excluded from              |
| 34 |                |                      |                                                                   | analysis.                                    |
| 35 |                |                      |                                                                   |                                              |
| 36 |                |                      |                                                                   |                                              |
| 37 |                | <a href="#">#12d</a> | If applicable, describe analytical methods taking account of      | n/a. The study did not use any analytical    |
| 38 |                |                      | sampling strategy                                                 | method.                                      |
| 39 |                |                      |                                                                   |                                              |
| 40 |                |                      |                                                                   |                                              |
| 41 |                | <a href="#">#12e</a> | Describe any sensitivity analyses                                 | n/a. No sensitive analysis were performed    |
| 42 |                |                      |                                                                   | in this study.                               |
| 43 |                |                      |                                                                   |                                              |
| 44 |                |                      |                                                                   |                                              |
| 45 | Participants   | <a href="#">#13a</a> | Report numbers of individuals at each stage of study—eg           | n/a...Since it was just a one visit study,   |
| 46 |                |                      | numbers potentially eligible, examined for eligibility,           | the participant only included if they met    |
| 47 |                |                      | confirmed eligible, included in the study, completing follow-     | the inclusion criteria and hence             |
| 48 |                |                      | up, and analysed. Give information separately for for exposed     | participant number were same throughout      |
| 49 |                |                      | and unexposed groups if applicable.                               | the study.                                   |
| 50 |                |                      |                                                                   |                                              |
| 51 |                |                      |                                                                   |                                              |
| 52 |                |                      |                                                                   |                                              |
| 53 |                |                      |                                                                   |                                              |
| 54 |                | <a href="#">#13b</a> | Give reasons for non-participation at each stage                  | n/a... No non-participation to report for    |
| 55 |                |                      |                                                                   | this study.                                  |
| 56 |                |                      |                                                                   |                                              |
| 57 |                |                      |                                                                   |                                              |
| 58 |                | <a href="#">#13c</a> | Consider use of a flow diagram                                    | n/a                                          |
| 59 |                |                      |                                                                   |                                              |
| 60 |                |                      |                                                                   |                                              |

|    |                  |                      |                                                                                                                                                                                                                   |                                                                            |  |
|----|------------------|----------------------|-------------------------------------------------------------------------------------------------------------------------------------------------------------------------------------------------------------------|----------------------------------------------------------------------------|--|
| 1  | Descriptive data | <a href="#">#14a</a> | Give characteristics of study participants (eg demographic, clinical, social) and information on exposures and potential confounders. Give information separately for exposed and unexposed groups if applicable. | 10                                                                         |  |
| 2  |                  |                      |                                                                                                                                                                                                                   |                                                                            |  |
| 3  |                  |                      |                                                                                                                                                                                                                   |                                                                            |  |
| 4  |                  |                      |                                                                                                                                                                                                                   |                                                                            |  |
| 5  |                  |                      |                                                                                                                                                                                                                   |                                                                            |  |
| 6  |                  |                      |                                                                                                                                                                                                                   |                                                                            |  |
| 7  |                  |                      |                                                                                                                                                                                                                   |                                                                            |  |
| 8  |                  | <a href="#">#14b</a> | Indicate number of participants with missing data for each variable of interest                                                                                                                                   | 10 (Table 1...spirometry data for only 19 healthy participants out of 20). |  |
| 9  |                  |                      |                                                                                                                                                                                                                   |                                                                            |  |
| 10 |                  |                      |                                                                                                                                                                                                                   |                                                                            |  |
| 11 | Outcome data     | <a href="#">#15</a>  | Report numbers of outcome events or summary measures. Give information separately for exposed and unexposed groups if applicable.                                                                                 | 8                                                                          |  |
| 12 |                  |                      |                                                                                                                                                                                                                   |                                                                            |  |
| 13 |                  |                      |                                                                                                                                                                                                                   |                                                                            |  |
| 14 | Main results     | <a href="#">#16a</a> | Give unadjusted estimates and, if applicable, confounder-adjusted estimates and their precision (eg, 95% confidence interval). Make clear which confounders were adjusted for and why they were included          | 7-14                                                                       |  |
| 15 |                  |                      |                                                                                                                                                                                                                   |                                                                            |  |
| 16 |                  |                      |                                                                                                                                                                                                                   |                                                                            |  |
| 17 |                  |                      |                                                                                                                                                                                                                   |                                                                            |  |
| 18 |                  |                      |                                                                                                                                                                                                                   |                                                                            |  |
| 19 |                  |                      |                                                                                                                                                                                                                   |                                                                            |  |
| 20 |                  | <a href="#">#16b</a> | Report category boundaries when continuous variables were categorized                                                                                                                                             | 14                                                                         |  |
| 21 |                  |                      |                                                                                                                                                                                                                   |                                                                            |  |
| 22 |                  |                      |                                                                                                                                                                                                                   |                                                                            |  |
| 23 |                  |                      |                                                                                                                                                                                                                   |                                                                            |  |
| 24 |                  | <a href="#">#16c</a> | If relevant, consider translating estimates of relative risk into absolute risk for a meaningful time period                                                                                                      | n/a...was not relevant in this study.                                      |  |
| 25 |                  |                      |                                                                                                                                                                                                                   |                                                                            |  |
| 26 | Other analyses   | <a href="#">#17</a>  | Report other analyses done—e.g., analyses of subgroups and interactions, and sensitivity analyses                                                                                                                 | 12-14                                                                      |  |
| 27 |                  |                      |                                                                                                                                                                                                                   |                                                                            |  |
| 28 | Key results      | <a href="#">#18</a>  | Summarise key results with reference to study objectives                                                                                                                                                          | 15                                                                         |  |
| 29 | Limitations      | <a href="#">#19</a>  | Discuss limitations of the study, taking into account sources of potential bias or imprecision. Discuss both direction and magnitude of any potential bias.                                                       | 17                                                                         |  |
| 30 |                  |                      |                                                                                                                                                                                                                   |                                                                            |  |
| 31 |                  |                      |                                                                                                                                                                                                                   |                                                                            |  |
| 32 |                  |                      |                                                                                                                                                                                                                   |                                                                            |  |
| 33 | Interpretation   | <a href="#">#20</a>  | Give a cautious overall interpretation considering objectives, limitations, multiplicity of analyses, results from similar studies, and other relevant evidence.                                                  | 15-17                                                                      |  |
| 34 |                  |                      |                                                                                                                                                                                                                   |                                                                            |  |
| 35 |                  |                      |                                                                                                                                                                                                                   |                                                                            |  |
| 36 | Generalisability | <a href="#">#21</a>  | Discuss the generalisability (external validity) of the study results                                                                                                                                             | n/a                                                                        |  |
| 37 |                  |                      |                                                                                                                                                                                                                   |                                                                            |  |
| 38 | Funding          | <a href="#">#22</a>  | Give the source of funding and the role of the funders for the present study and, if applicable, for the original study on which the present article is based                                                     | 2                                                                          |  |
| 39 |                  |                      |                                                                                                                                                                                                                   |                                                                            |  |
| 40 |                  |                      |                                                                                                                                                                                                                   |                                                                            |  |
| 41 |                  |                      |                                                                                                                                                                                                                   |                                                                            |  |

The STROBE checklist is distributed under the terms of the Creative Commons Attribution License CC-BY. This checklist can be completed online using <https://www.goodreports.org/>, a tool made by the [EQUATOR Network](#) in collaboration with [Penelope.ai](#)

1  
2  
3  
4  
5  
6  
7  
8  
9  
10  
11  
12  
13  
14  
15  
16  
17  
18  
19  
20  
21  
22  
23  
24  
25  
26  
27  
28  
29  
30  
31  
32  
33  
34  
35  
36  
37  
38  
39  
40  
41  
42  
43  
44  
45  
46  
47  
48  
49  
50  
51  
52  
53  
54  
55  
56  
57  
58  
59  
60

For peer review only
