# Supplementary material for: Hypersegmented airway neutrophils and its association with reduced lung function in adults with obstructive airway disease: an exploratory study
Source: PubMed Central journal article supplement — BMJ Open. 2019 Jan 28;9(1):e024330. doi: 10.1136/bmjopen-2018-024330 (PMC6352776; doi:10.1136/bmjopen-2018-024330), 2019-01-28
Supplement: bmjopen-2018-024330supp001.pdf [file bmjopen-2018-024330supp001.pdf]

**Supplementary data:**

*Table S1: Possible causes of bronchiectasis in bronchiectasis group (n=18).*

| <b>Causes of Bronchiectasis</b> | <b>Number of participants (n), (%)</b> |
|---------------------------------|----------------------------------------|
| Idiopathic                      | 10 (55.55)                             |
| Post-infection                  | 6 (33.33)                              |
| Immune deficient                | 1 (5.56)                               |
| Ciliary dyskinesia              | 0 (0)                                  |
| COPD                            | 0 (0)                                  |
| Asthma                          | 0 (0)                                  |
| Others                          | 1 (5.56)                               |
